# Supplementary material for: Droughts in the area of Poland in recent centuries
Source: Copernicus journal article supplement (doi:10.5194/cp-2019-64), 2019-06-11
Supplement: Supplementary file [file cp-2019-64-AC3-supplement.pdf]

# Droughts in the area of Poland in recent centuries in the light of multi-proxy data

Rajmund Przybylak<sup>1</sup> ORCID: 0000-0003-4101-6116, Piotr Oliński<sup>2</sup> ORCID: 0000-0003-1428-0800, Marcin Koprowski<sup>3</sup> ORCID: 0000-0002-0583-4165, Janusz Filipiak<sup>4</sup> ORCID: 0000-0002-4491-3886, Aleksandra Pospieszynska<sup>1</sup> ORCID: 0000-0003-2532-7168, Waldemar Chorążyczewski<sup>2</sup> ORCID: 0000-0002-0063-0032, Radosław Puchałka<sup>3</sup> ORCID: 0000-0002-4764-0705, and Henryk P. Dąbrowski<sup>5</sup> ORCID:0000-0002-8846-5042

<sup>1</sup> Department of Meteorology and Climatology, Faculty of Earth Sciences, Nicolaus Copernicus University, Toruń, Poland

<sup>2</sup> Department of Medieval History, Institute of History and Archival Sciences, Faculty of History, Nicolaus Copernicus University in Toruń, Poland

<sup>3</sup> Department of Ecology and Biogeography, Faculty of Biology and Environmental Protection, Nicolaus Copernicus University, Toruń, Poland

<sup>4</sup> Department of Meteorology and Climatology, Institute of Geography, Faculty of Oceanography and Geography, University of Gdansk, Poland

<sup>5</sup> Dendroarchaeological Laboratory, Archaeological Museum in Biskupin, Biskupin, Poland

*Correspondence to:* R. Przybylak ([rp11@umk.pl](mailto:rp11@umk.pl))

**Abstract:** The history of drought occurrence in Poland in the last millennium is poorly known. To improve this knowledge we have conducted a comprehensive analysis using both proxy data (documentary and dendrochronological) and instrumental measurements of precipitation. The paper presents the main features of droughts in Poland in recent centuries, including their frequency of occurrence, coverage, duration and intensity. The reconstructions of droughts based on all the mentioned sources of data covered the period 996–2015. Examples of megadroughts were also chosen using documentary evidence, and some of them were described.

Various documentary sources have been used to identify droughts in the area of Poland in period 1451–1800 and to estimate their intensity, spatial coverage and duration. Twenty-two local chronologies of trees (pine, oak, and fir) from Poland were taken into account for detecting negative pointer years (exceptionally narrow rings). The longest chronology covers the years 996–1986 and was constructed for eastern Pomerania. The delimitation of droughts based on instrumental data (eight long-term precipitation series) was conducted using two independent approaches (Standard Precipitation Index (SPI) calculated for 1-, 3-, and 24-month time scales, and new method proposed by authors). For delimitation of droughts (dry months), the criteria used were those proposed by McKee and modified for the climate conditions of Poland by Łabędzki.

More than one hundred droughts were found in documentary sources in period 1451–1800, including 17 megadroughts. A greater-than-average number of droughts was observed in the second halves of the 17<sup>th</sup> century, and of the 18<sup>th</sup> century in particular. Dendrochronological data confirmed this general tendency in the mentioned period. The clearly greatest number of negative pointer years occurred in the 18<sup>th</sup> century and then in the period 1451–1500. In the period 996–2015, a total of 758 negative pointer years were recorded.

Analysis of SPI (including its lowest values, i.e. droughts) showed that the long-term frequency of droughts in Poland has been stable in the last two or three centuries. Extreme and severe droughts were most frequent in the coastal part of Poland and in Silesia. Most droughts had a duration of two months (about 60–70%), or 3–4 months (10–20%). Frequencies of droughts with a duration of 5 and more months were lower than 10%. The longest droughts had a duration of 7–8 months. The frequency of droughts of all categories in Poland in the instrumental period 1722–2015 was greatest in winter, while in documentary evidence (1451–1800) droughts in this season are rarely mentioned.

The occurrence of negative pointer years (a good proxy for droughts) was compared with droughts delimited based on documentary and instrumental data. A good correspondence was found between the timing of occurrence of droughts identified using all three kinds of data (sources).

1

## 2 **1 Introduction**

3 The increase of rate of global warming that has been observed in recent decades also influences  
4 characteristic changes in the occurrence and intensity of precipitation (IPCC, 2013). Although  
5 precipitation totals are slightly greater from year to year in some regions, frequency of precipitation  
6 is getting lower, while its intensity is increasing. As a result, breaks between precipitation episodes  
7 are getting longer and longer, which significantly favours the occurrence of droughts. The majority  
8 of statistical analyses presenting results of droughts frequency and intensity averaged for the entire  
9 world (Dai and Trenberth, 1998; Dai et al., 2004; Dai, 2011a, b, 2013; IPCC, 2013) and its different  
10 regions (see, e.g., Held et al., 2005; Alexander et al., 2006; Bartholy and Pongracz, 2007;  
11 Łabędzki, 2007; Brázdil et al., 2009; Seneviratne et al., 2012; NAS, 2013; Miles et al., 2015; Osuch  
12 et al., 2016; Bąk and Kubiak-Wójcicka, 2017; Brázdil et al., 2018) usually confirm their rising  
13 tendencies, in particular in more recent decades. On the other hand, some authors document that  
14 this change for the entire globe is not as clear as is presented in some abovementioned publications  
15 and depends among others on the drought metrics used (Sheffield et al., 2012; Greve et al., 2014  
16 and references therein). For example, Sheffield et al. (2012) argue that overestimation of the rate  
17 of change of global droughts is related to the shortcomings (simplifications) of the Palmer Drought  
18 Severity Index (PDSI) used for this purpose. They write: “The simplicity of the PDSI, which is  
19 calculated from a simple water-balance model forced by monthly precipitation and temperature  
20 data, makes it an attractive tool in large-scale drought assessments, but may give biased results in  
21 the context of climate change.” Thus, the reliable estimate of global tendencies in the occurrence  
22 and intensity of droughts still needs more research. Nevertheless, a greater or lesser increase in  
23 frequency of droughts in many regions have been observed in recent decades. Moreover, climatic  
24 models project that this tendency probably will be more common and clear in the future world.  
25 IPCC (2013) report concludes that droughts will be not only more frequent, but also more intense  
26 in many regions, but particularly in areas with dry conditions in today’s climate. For this reason,  
27 the study of drought occurrence and its intensity is very important, in particular when its manifold  
28 negative socio-economic consequences are taken into account. Many aspects dealing with drought  
29 (definition; kinds – meteorological, agricultural, hydrological, socio-economic; quantitative ways  
30 of measurement; socio-economic consequences; etc.) were described recently in many  
31 publications (e.g. Wilhite and Glantz, 1985; Tate and Gustard, 2000; Herweijer et al., 2007; Mishra  
32 and Singh, 2010; Dai 2011a; Brázdil et al., 2013, 2018; IPCC, 2014; Fragoso et al., 2018; White  
33 et al., 2018) and therefore a brief overview is omitted here.

34 To estimate how unprecedented is the scale of climate drying in recent decades, a longer  
35 perspective is needed. Therefore, in recent decades quite a lot of drought reconstructions  
36 encompassing almost the entire millennium, or the shorter historical, pre-industrial period, were

1 constructed for different greater or smaller regions (e.g. Inglot, 1968; Piervitali and Colacino,  
2 2001; Cook et al., 2004, 2010, 2015; Herweijer et al., 2007; Pfister et al., 2006; Brewer et al.,  
3 2007; Domínguez-Castro et al., 2008, 2010; Woodhouse et al., 2010; Brázdil et al., 2013, 2016,  
4 2018 (see references herein); Dobrovolný et al., 2015; Fragoso et al., 2018; Hanel et al., 2018).

5 What is the state of knowledge about droughts occurrence and intensity in Poland – the area  
6 that is the object of our studies in the paper? It must be said that for the instrumental period, and  
7 in particular for the period after World War II, the knowledge is good. Papers have been published  
8 analysing: 1) classification of drought types and the development of drought indices (Bąk and  
9 Łabędzki, 2002; Łabędzki, 2007; Łabędzki and Kanecka-Geszke, 2009; Tokarczyk, 2013;  
10 Łabędzki and Bąk, 2014); 2) tendencies in drought occurrence and intensity (Farat et al., 1998;  
11 Magier et al., 2000; Łabędzki, 2007; Kalbarczyk, 2010; Bartczak et al., 2014; Radzka, 2015;  
12 Wypych et al., 2015; Bąk and Kubiak-Wójcicka, 2017); 3) monitoring of drought conditions  
13 (Łabędzki, 2006; Doroszewski et al., 2008, 2012; Tokarczyk and Szalińska, 2013; IMGW, 2014;  
14 ITP, 2014; Łabędzki and Bąk, 2014); and 4) drought hazard assessment for periods when  
15 observations are available (Łabędzki, 2009; Tokarczyk and Szalińska, 2014). In recent years the  
16 influence of future climate change on the occurrence of droughts in Poland in the 21<sup>st</sup> century has  
17 also been addressed (Liszewska et al., 2012; Osuch et al., 2012, 2016). On the other hand, little is  
18 known about drought occurrence in the pre-instrumental and early instrumental periods in Poland.  
19 Generally, only one attempt of droughts chronology for the 16<sup>th</sup> to mid-19<sup>th</sup> century was proposed  
20 based on documentary evidence (Inglot, 1968).

21 Drought is the one of the most stressful factors for trees (Vitas, 2001; Allen et al., 2010; Sohar  
22 et al., 2013). The measurement of tree ring widths is one of the ways to study the effect of climate  
23 parameters on trees (Zielski et al., 2010). Some factors such as frost or summer drought may have  
24 an immediate effect on ring width, whereas other factors, such as winter drought, may have a  
25 delayed effect on ring widths. This delayed effect occurs because the meristematic tissues are  
26 dormant during the winter months in temperate and cold climates. The effect of different factors  
27 is seen as variations in ring size and structure, which change systematically, or vary slowly  
28 throughout the life of the tree (Fritts, 1976). The effect of drought on tree rings is observed as  
29 narrow rings (Koprowski et al., 2012; Opała, 2015). The relationships are significant enough to  
30 reconstruct drought in temperate climate also in cold regions like Finland (Helama and Lindholm,  
31 2003), Sweden (Seftigen et al., 2013) and Czech Republic (Dobrovolný et al., 2015). Therefore,  
32 we have assumed that information derived from tree rings can complement the existing knowledge  
33 about past droughts in Poland. According to studies by Somorowska (2016) the effect of drought  
34 extends from the south-west towards the center part of the country and, in some cases, to the  
35 north-east of Poland. Another study suggest that in the future some of the highest probability of

1 drought occurrence can be in the central part with the lowest probability in south-eastern Poland  
2 (Diakowska et al., 2018).

3 Although in the last three decades many climate reconstructions for the last millennium have  
4 been conducted for Poland (see Przybylak et al., 2005 or Przybylak, 2016 for a review), droughts  
5 were not analysed. Therefore, to fill this important gap we decided to investigate them in more  
6 detailed manner than was done by the Inglot's team. Moreover, for this purpose we used more  
7 sorts of proxy data (not only documentary but also dendrochronological). The reconstructions of  
8 droughts based on all the mentioned sources of data covered the period 996–2015. Thus, the main  
9 aim of the paper is to present the main features of drought occurrence, duration and intensity in  
10 the area of Poland in this period. Section 2 describes all the kinds of data used and their quality.  
11 Section 3 addresses the methods used in this study, including drought indices. Section 4 presents  
12 the results of three reconstructions of droughts derived from 1) documentary, 2) instrumental, and  
13 3) dendrochronological data. Examples of megadroughts are also analysed here. The results  
14 obtained are discussed in Section 5, and main conclusions in the last section.

## 16 2 Data

### 17 2.1. Documentary data

18 Records on drought for historical reconstruction of climate can be found in many different  
19 historical sources from Poland. Their number has significantly increased since the mid-15<sup>th</sup>  
20 century, which is why the mid-15<sup>th</sup> century was adopted as the initial chronological boundary for  
21 the reconstruction of the number and intensity of droughts in the Polish territory using  
22 documentary evidence. Below we describe the types of historical sources used to reconstruct  
23 droughts in Poland.

24 Records of droughts in the Polish territory are most often found in narrative sources –  
25 chronicles, yearbooks, memoirs, diaries, travel accounts. The information included in these  
26 sources has a varying degree of accuracy. Often only one account concerning drought appeared,  
27 such as, for example, “magna siccitas”. In many of the records, however, more detailed  
28 descriptions of the course of droughts and accompanying phenomena were given. In the ancient  
29 sources droughts were described above all when their manifestations were very clear and when  
30 they had an impact on economic and social life. Another group of sources used by us are daily  
31 records that have the character of meteorological observations. Sometimes, they were prepared by  
32 scholars such as professors of the Jagiellonian University Marcin Biem (ca. 1470–1540) and  
33 Michał of Wiślica (1499–1575), who conducted such observations in Kraków from 1499 to 1531  
34 and from 1534 to 1551 (Limanówka, 2001), or townsmen with scientific ambitions such as  
35 Gottfried Reyger (1704–1788), who began his observations in Gdańsk in 1721 as a 17-year-old  
36 and continued them later, among others as a member of the *Naturforschende Gesellschaft* in

1 Gdańsk until 1786 (Filipiak et al., 2019). Sometimes daily observations were conducted by  
2 amateurs, the best example of which are the records of the Polish nobleman from the eastern  
3 territories of the Polish–Lithuanian Commonwealth, Jan Antoni Chrapowicki, which were  
4 conducted for the years 1656–1685 (Nowosad et al., 2007). Sources of this kind are nonetheless  
5 relatively rare.

6 The correspondence, the manuscript press (“written newspapers”) and printed press were  
7 also used in the reconstruction of droughts. In the case of written newspapers, these are often  
8 records similar to those that appear in chronicles. They were drawn up on a regular basis, which  
9 increases their credibility. They provided news from the region, as well as information coming  
10 from other countries, e.g. from Lviv, from which a newswriter in 1698 wrote: “w tych krajach  
11 chaniebnie [! – emphasis added] susze wielkie, dla których na zimę bardzo mało siano, bo nie  
12 podobna lemiem ukroić ziemię” (ang. *in these countries shamefully there are great droughts,*  
13 *for which reason we sowed very little for the winter, because you cannot cut the land with the*  
14 *ploughshare*”) (Maliszewski, 2018). Other sources that turned out to be useful for the  
15 implementation of our project were official files (e.g. protocols from meetings of the regional  
16 dietines and the Parliament (Sejm), treasury registers, inspection reports) documenting activities  
17 undertaken, e.g. in connection with droughts and fires. They reported requests for financial support  
18 in connection with drought, tax exemption requests, etc. In economic files one can find  
19 explanations for low harvests, which occurred for example due to drought. There are a few sources  
20 concerning religious behaviours in which, for example, the organisation of prayers asking for rain  
21 or describing the end of a drought were described. When such accounts appeared, it can be  
22 assumed that the drought must have been severe for people and the environment.

23 In addition to the above mentioned historical sources collected during the queries in Polish,  
24 Lithuanian, Ukrainian and German archives, the authors used several published collections (of  
25 varied quality) of historical sources concerning the climate research in the period from the 10<sup>th</sup>  
26 century to the end of the 18<sup>th</sup> for Poland, Europe Central or selected regions of Central Europe.  
27 They include: the period from the 10<sup>th</sup> century to the end of the 16<sup>th</sup> (Girguś et al., 1965); the  
28 Middle Ages (Malewicz, 1980); 1450–1586 (Walawender, 1935); the years 1648–1696  
29 (Namaczyńska, 1937); and 1772–1848 (Szewczuk, 1939). In the last 20 years, two databases  
30 containing over ten thousand weather records were made available in universities in Toruń and  
31 Wrocław as part of cooperation between climatologists and historians. They have been used many  
32 times to study Poland's climate in historical times (Wójcik et al., 2000; Przybylak et al., 2001,  
33 2004, 2005, 2010; Przybylak, 2011, 2016); they have also contributed to widening the scope of  
34 this research.

35 To sum up, for the purpose of this research over 200 accounts referring directly to droughts  
36 and prolonged shortages of rainfall were used, along with a few hundred more descriptions from

1 everyday weather observations, the use and critical elaboration of which allowed periods of  
2 drought to be indicated. The state of the preservation of sources for particular periods and for  
3 individual regions is uneven. Most of them describe droughts in Silesia, Pomerania and Lesser  
4 Poland. A large number of entries refers to droughts affecting the whole territory of Poland. In the  
5 case of Silesia, the distribution of sources is fairly even for the whole period; in the case of other  
6 regions their number increases with successive ages. The only exception is the first half of the 17<sup>th</sup>  
7 century, in which the number of preserved records is definitely smaller. To some extent, this was  
8 affected by the losses in the state of preserved sources that occurred during the Swedish invasion  
9 on Polish territories in 1655-1660. Many sources from the first half of the 17<sup>th</sup> century were then  
10 destroyed as a result of military actions.

11 The accuracy scale of the collected information is variable. Some accounts provide quite  
12 precise information concerning the duration of the drought, even to the accuracy of one day, while  
13 others are definitely more general – they only indicate the existence of a drought in a given year.  
14 It very often occurs that one drought is described in several, or sometimes even several dozen,  
15 independent sources, which confirms its high intensity.

16 To assess the credibility of individual records, it was necessary to conduct a critical source  
17 analysis, in which it turned out that sometimes even short accounts provided very important and  
18 reliable information, while other records with a similar structure proved to be wrong due to the  
19 fact that, e.g., the year of the occurrence of the drought was changed (e.g. by one year) when the  
20 information was being copied from another, earlier source. The sources containing daily records,  
21 as in the case of the memoirs of A. Chrapowicki or G. Reyger required a different treatment. It  
22 was possible to count the days with precipitation and without precipitation along with a very  
23 precise indication of the duration of the droughts.

24

## 25 **2.2. Dendrochronological data**

26 We used 22 chronologies (17 oak chronologies, 5 pine chronologies and 1 fir chronology) from  
27 different locations in Poland to detect pointer years (Table 1, Fig. 1). Table 1 presents a list of  
28 them, including also time coverage and sources. As results from this Table, the longest chronology  
29 available to us covers the years 996–1986 and was constructed for western Pomerania (Site 5). For  
30 Upper Silesia (Sites 16 and 18) and Lesser Poland (Sites 21 and 22), the pointer years were detected  
31 by Opała and Mendecki (2014) and Opała (2015) for Upper Silesia, and by Szychowska-Krapiec  
32 (2010) for Lesser Poland (Table 1, Fig. 1).

33

34 Table 1. Basic characteristic of the chronologies used for pointer year analysis. Location  
35 of natural-forest regions (Zielony and Kliczkowska, 2010) and sites is shown in Fig. 1.  
36 EPS- expressed population signal, rbar.tot- the mean of all correlations between different  
37 cores

| Site number                                           | Site name         | Time span   | Number of samples | EPS   | rbar.tot | Species | Source                                                                            |
|-------------------------------------------------------|-------------------|-------------|-------------------|-------|----------|---------|-----------------------------------------------------------------------------------|
| <b>Region I (Baltic Province)</b>                     |                   |             |                   |       |          |         |                                                                                   |
| Site 1                                                | Koszalin          | 1782 – 1987 | 22                | 0.899 | 0.339    | Oak     | <a href="https://www.ncdc.noaa.gov/">https://www.ncdc.noaa.gov/</a> (Ważny, 1990) |
| Site 2                                                | Gdańsk            | 1762 – 1986 | 45                | 0.887 | 0.192    | Oak     | <a href="https://www.ncdc.noaa.gov/">https://www.ncdc.noaa.gov/</a> (Ważny, 1990) |
| Site 3                                                | Wolin             | 1554 – 1987 | 23                | 0.877 | 0.318    | Oak     | <a href="https://www.ncdc.noaa.gov/">https://www.ncdc.noaa.gov/</a> (Ważny, 1990) |
| Site 4                                                | Gdańsk            | 1175 – 1396 | 13                | 0.579 | 0.388    | Oak     | Dąbrowski HP, unpublished                                                         |
| Site 5                                                | western Pomerania | 996–1986    | 205               | 0.907 | 0.250    | Oak     | <a href="https://www.ncdc.noaa.gov/">https://www.ncdc.noaa.gov/</a> (Ważny, 1990) |
| <b>Region II (Masuria-Podlasie Province)</b>          |                   |             |                   |       |          |         |                                                                                   |
| Site 6                                                | Gołdap            | 1871 – 1987 | 22                | 0.941 | 0.472    | Oak     | <a href="https://www.ncdc.noaa.gov/">https://www.ncdc.noaa.gov/</a> (Ważny, 1990) |
| Site 7                                                | Suwałki           | 1861 – 1987 | 19                | 0.872 | 0.303    | Oak     | <a href="https://www.ncdc.noaa.gov/">https://www.ncdc.noaa.gov/</a> (Ważny, 1990) |
| Site 8                                                | Hajnówka          | 1720 – 1985 | 19                | 0.851 | 0.314    | Oak     | <a href="https://www.ncdc.noaa.gov/">https://www.ncdc.noaa.gov/</a> (Ważny, 1990) |
| <b>Region III (Greater Poland-Pomerania Province)</b> |                   |             |                   |       |          |         |                                                                                   |
| Site 9                                                | Poznań            | 1836 – 1987 | 17                | 0.904 | 0.385    | Oak     | <a href="https://www.ncdc.noaa.gov/">https://www.ncdc.noaa.gov/</a> (Ważny, 1990) |
| Site 10                                               | Zielona Góra      | 1774 – 1987 | 19                | 0.876 | 0.330    | Oak     | <a href="https://www.ncdc.noaa.gov/">https://www.ncdc.noaa.gov/</a> (Ważny, 1990) |
| Site 11                                               | Toruń             | 1714 – 2015 | 48                | 0.886 | 0.335    | Oak     | Puchałka et al., 2016 (updated)                                                   |
| Site 12                                               | Tuchola           | 1249 – 1490 | 7                 | 0.054 | 0.347    | Pine    | Dąbrowski HP, unpublished                                                         |
| Site 13                                               | Kuyavia-Pomerania | 1169 – 2015 | 247               | 0.816 | 0.195    | Pine    | Koprowski et al., 2012                                                            |
| Site 14                                               | Chojnice          | 1100 – 1468 | 21                | 0.688 | 0.327    | Oak     | Dąbrowski HP, unpublished                                                         |
| <b>Region IV (Masovia-Podlasie Province)</b>          |                   |             |                   |       |          |         |                                                                                   |

|                                    |               |                   |     |                    |                   |              |                                                                                   |
|------------------------------------|---------------|-------------------|-----|--------------------|-------------------|--------------|-----------------------------------------------------------------------------------|
| Site 15                            | Warszawa      | 1690<br>–<br>1985 | 19  | 0.850              | 0.291             | Oak          | <a href="https://www.ncdc.noaa.gov/">https://www.ncdc.noaa.gov/</a> (Ważny, 1990) |
| Region V (Silesia Province)        |               |                   |     |                    |                   |              |                                                                                   |
| Site 16                            | Upper Silesia | 1770<br>–<br>2010 | 80  | 0.880<br>(average) | correlation 0.530 | Pine and oak | Opała and Mendecki, 2014                                                          |
| Site 17                            | Wrocław       | 1727<br>–<br>1987 | 22  | 0.870              | 0.327             | Oak          | <a href="https://www.ncdc.noaa.gov/">https://www.ncdc.noaa.gov/</a> (Ważny, 1990) |
| Site 18                            | Upper Silesia | 1568<br>–<br>2010 | 178 | 0.850              | correlation 0.510 | Pine         | Opała, 2015                                                                       |
| Region VI (Lesser Poland Province) |               |                   |     |                    |                   |              |                                                                                   |
| Site 19                            | Kraków        | 1792<br>–<br>1986 | 29  | 0.906              | 0.361             | Oak          | <a href="https://www.ncdc.noaa.gov/">https://www.ncdc.noaa.gov/</a> (Ważny, 1990) |
| Site 20                            | Kosobudy      | 1782<br>–<br>1989 | 22  | 0.937              | 0.448             | Oak          | <a href="https://www.ncdc.noaa.gov/">https://www.ncdc.noaa.gov/</a> (Ważny, 1990) |
| Site 21                            | Lesser Poland | 1109<br>–<br>2004 | 238 | No data            | No data           | Pine         | Szychowska-Krapiec, 2010                                                          |
| Site 22                            | Lesser Poland | 1109<br>–<br>2006 | 560 | No data            | No data           | Fir          | Szychowska-Krapiec, 2010                                                          |

1

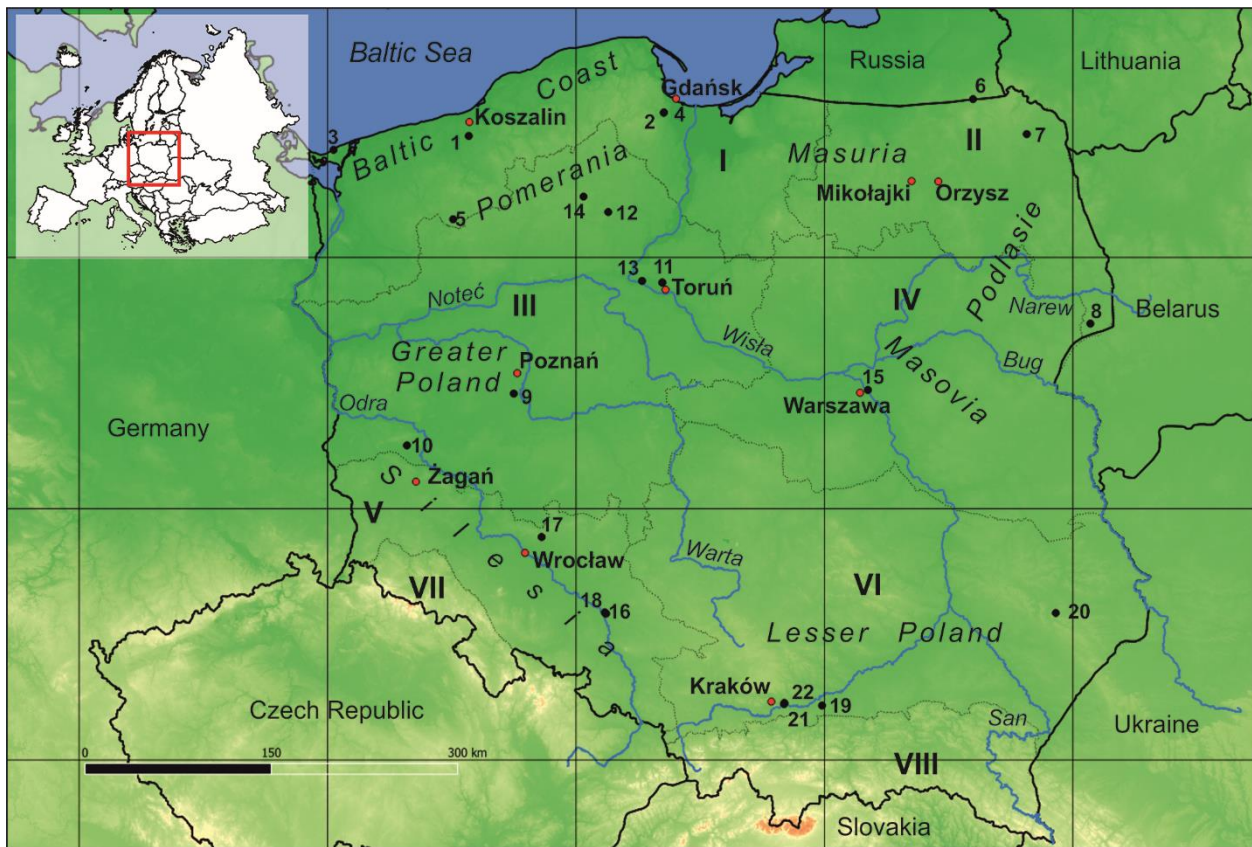

2



1 Fig. 1. Location of dendrochronological sites and natural-forest regions (black dots and black  
2 dotted lines, respectively, for more details see Table 1) as well as meteorological series (red dots)  
3 and geographical regions (for more details see Table 2) used in the study.

4

## 5 **2.3. Instrumental data**

6

### **2.3.1. Isolated series**

7 The number of known precipitation series and whose beginnings date back to earlier than the 20<sup>th</sup>  
8 century is very limited. There are only a dozen of those begun before 1800. Efforts to organise  
9 meteorological measurements in Poland were made relatively early in comparison to other  
10 European countries. The country's complicated history (e.g. many wars and changes of borders)  
11 has resulted in the loss of the majority of sources collected in the archives, in many cases  
12 irretrievably. However, actions to restore the long measurement series based on the discovered  
13 collections have been taken for a few selected locations.

14 The oldest surviving results of instrumental precipitation series in Poland come from  
15 Gdańsk and are dated to the first half of the 18<sup>th</sup> century. In January 1739, Michael Christoph  
16 Hanov, a mathematician and physician, started daily observations of weather phenomena and  
17 measurements of a dozen meteorological elements, including precipitation. The results of his  
18 efforts were published in the newspaper *Danziger Erfahrungen* on a weekly basis. Hanov  
19 presented the complete series in his manuscript *Wetter Beobachtungen in Danzig 1739–1773*.

20 Hanov's instrumental series was accompanied by the notes from a weather chronicle  
21 authored by Gottfried Reyger. He started systematic observations of the weather in Gdańsk in  
22 December 1721 and carried them out until the mid-1786. The results of observations were used  
23 mainly to study how climate affects the development of plants. Reyger published the outcomes of  
24 his studies in *Die Beschaffenheit der Witterung in Danzig vom Jahr 1722 bis 1769 beobachtet*  
25 *nach ihren Veränderungen und Ursachen erwogen* (Reyger, 1770) and in *Die Beschaffenheit der*  
26 *Witterung in Danzig. Zweyter Theil vom Jahr 1770 bis 1786, nebst Zustätzen zur Danziger Flora*  
27 (Reyger, 1788).

28 Reyger usually presented remarks on general weather conditions supplemented by some  
29 additional data. Months were usually described in a qualitative, even aggregate, manner. His notes  
30 were very detailed and even the weather of the particular days or weeks was very often  
31 characterised. Reyger paid special attention to particularly important weather and climate  
32 phenomena (heavy rain, floods, droughts, and heat and cold waves). His notes after 1783 (Hanov's  
33 death) were more accurate. Despite the lack of measured values of precipitation, detailed data on  
34 the monthly number of rainfall and snowfall were presented (for more details including the  
35 reconstruction of the air temperature and precipitation series since 1721 see Filipiak et al., 2019).  
36 Some sources suggest an even earlier date for the beginning of Reyger's instrumental observations

1 (Hellmann, 1883, after Rojecki, 1965). Besides the short description in the mentioned literature no  
2 other proof of such activity is available.

3

### 4 **2.3.2. Long-term continuous series**

5 The series from Wrocław (formerly Breslau) that commenced in 1791 (Bryś and Bryś, 2010) is  
6 the longest continuous Polish precipitation series. For the purpose of the present paper we  
7 prolonged this series until 1781 based on precipitation measurements in Żagań (formerly Sagan)  
8 within the Mannheim network of stations established for Europe and North America by the  
9 Palatine Meteorological Society in 1780 (Przybylak et al., 2014). The cited authors proved that  
10 there exist high correlations between the precipitation series from both places. Source data from  
11 Żagań were taken from the publication *Ephemerides Societatis Meteorologicae Palatinae, 1783–*  
12 *1795*. In addition, we must say that the Wrocław series is the only continuous series to have begun  
13 before 1800 in the area currently belonging to Poland. The best known long-term climatological  
14 series in Poland is the one from Kraków that commenced in 1792. The work on completing the  
15 collections of the Kraków series continue till the present day, the effect of which are  
16 reconstructions of monthly values of precipitation sums since 1863 (Twardosz, 2005, 2007). As  
17 for other Polish cities, Lorenc (2000) performed a homogenisation of series of monthly  
18 precipitation totals of Warszawa (Warsaw) since 1813. Miętus (2002) reconstructed atmospheric  
19 precipitation sums from Koszalin (formerly Köslin) since 1848. In another paper, Kożuchowski  
20 and Miętus (1996) presented series of precipitation totals in Szczecin (formerly Stettin) since 1848.  
21 In 2011 a reconstruction was performed of the precipitation series from Gdańsk in 1880–2008  
22 (further extended to 1851) (Filipiak, 2011). During the CLIMPOL project (Climate of northern  
23 Poland during the last 1000 years: Constraining the future with the past) Filipiak reconstructed the  
24 series of monthly precipitation totals since 1891 for Lake Żabińskie in NE Poland (54°07' N;  
25 21°59' E) (Larocque-Tobler et al., 2015). Further, the series of Orzysz (formerly Arys) and  
26 Mikołajki (formerly Nikolaiken), also in NE Poland, were collected for the years 1830–1904 and  
27 since 1889, respectively. As both stations are located very close to one another (approximately 20  
28 km) these two series have very much in common. The correlation coefficient calculated for the  
29 overlapping periods 1889–1904 and 1981–2015 exceeds 0.85. Thus we decided to combine both  
30 series: data from Orzysz covers the period between 1830 and 1890, the later data comes from  
31 Mikołajki. A couple of series, e.g. Poznań (formerly Posen), Toruń (formerly Thorn), Racibórz  
32 (formerly Ratibor, Silesia), Śnieżka (formerly Schneekoppe, Sudety Mountains), began around the  
33 middle of the 19<sup>th</sup> century and are available in yearbooks that were initially released by the Royal  
34 Prussian Meteorological Institute (Königlich Preussischen Meteorologischen Institut), then since  
35 1918 by the Polish National Meteorological and Hydrological Service (PIM until 1945, further

1 PIHM and finally, after 1972 IMGW). The complete list of instrumental series employed in the  
 2 current research and their sources are presented in Table 2.

3 Table 2. List of sites, their locations and periods covered by series of monthly precipitation totals  
 4 used in the paper

| No.                         | Station   | Geographical region | Observation period | Location (φ, λ, h)                    | Sources of data                                                                                                                                                                                                                                              |
|-----------------------------|-----------|---------------------|--------------------|---------------------------------------|--------------------------------------------------------------------------------------------------------------------------------------------------------------------------------------------------------------------------------------------------------------|
| Isolated series             |           |                     |                    |                                       |                                                                                                                                                                                                                                                              |
| 1a                          | Gdańsk *  | 1                   | 1722–1786          | 54°20'N<br>18°40'E<br>13 m<br>a.s.l.  | Reyger (1770, 1788) and Filipiak et al. (2019) for the periods 1722–1738 and 1773–1786; Hanov (1773) for the period 1739–1773                                                                                                                                |
| Long-term continuous series |           |                     |                    |                                       |                                                                                                                                                                                                                                                              |
| 1b                          | Gdańsk    | 1                   | 1851–2015          | 54°20'N<br>18°40'E<br>13 m<br>a.s.l.  | Filipek (2010 modified 2018) for the whole period                                                                                                                                                                                                            |
| 2                           | Koszalin  | 1                   | 1851–2015          | 54°12'N<br>16°11'E<br>46 m<br>a.s.l.  | Reichsamt für Wetterdienst (1939) for the period 1851–1930 corrected by Miętus (2002); Miętus (2002) for the period 1931–1990; Central Database of Historical Data of IMGW-PIB (Polish National Meteorological and Hydrological Service) for years 1991–2015 |
| 3a                          | Orzysz    | 2                   | 1830–1890          | 53°48'N<br>21°56'E<br>122 m<br>a.s.l. | Dove (1851) for the period 1830–1850; Reichsamt für Wetterdienst (1939) for the years 1851–1904                                                                                                                                                              |
| 3b                          | Mikołajki | 2                   | 1891–2015          | 53°48'N<br>21°34'E<br>116 m<br>a.s.l. | Central Database of Historical Data of IMGW-PIB for the whole period                                                                                                                                                                                         |
| 4                           | Toruń     | 3                   | 1871–2015          | 53°01'N<br>18°36'E<br>60 m<br>a.s.l.  | Pospieszyńska and Przybylak (2013) for the period 1871–2010; Central Database of Historical Data of IMGW-PIB for years 2011–2015                                                                                                                             |
| 5                           | Poznań    | 3                   | 1848–2015          | 52°25'N<br>16°56'E<br>66 m<br>a.s.l.  | Dove (1851) for the period 1848–1850; Central Database of Historical Data of IMGW-PIB for the years 1851–2015                                                                                                                                                |
| 6                           | Warszawa  | 4                   | 1813–2015          | 52°13'N<br>21°01'E<br>97 m<br>a.s.l.  | Lorenc (2000, 2007) for the years 1813–1999; Central Database of Historical Data of IMGW-PIB for the years 2000–2015                                                                                                                                         |
| 7a                          | Żagań     | 5                   | 1781–1790          | 51°37'N<br>15°19'E<br>102 m<br>a.s.l. | <i>Ephemerides Societatis Meteorologicae Palatinae, 1783–1795</i> for the whole period                                                                                                                                                                       |
| 7b                          | Wrocław   | 5                   | 1791–2015          | 51°07'N<br>17°05'E                    | Bryś and Bryś (2010) for the years 1791–2000; Central Database of                                                                                                                                                                                            |

|   |        |   |           |                                       |                                                                                                                                                                           |
|---|--------|---|-----------|---------------------------------------|---------------------------------------------------------------------------------------------------------------------------------------------------------------------------|
|   |        |   |           | 120 m<br>a.s.l.                       | Historical Data of IMGW-PIB for the<br>years 2001–2015                                                                                                                    |
| 8 | Kraków | 6 | 1876–2015 | 50°04'N<br>19°58'E<br>216 m<br>a.s.l. | Kożuchowski (1985) for the period<br>1876–1900, Twardosz (2007) for the<br>years 1901–2000, Central Database of<br>Historical Data of IMGW-PIB for the<br>years 2001–2015 |

1

2 Key: geographical regions: 1 – Baltic Coast – Pomerania, 2 – Masuria – Podlasie, 3 – Great  
3 Poland, 4 – Masovia, 5 – Silesia, 6 – Lesser Poland

4 \*the series for periods 1722–1738 and 1773–1786 were reconstructed based on Reyger's weather  
5 chronicle

6

### 7 **3. Methods**

#### 8 **3.1. Documentary data**

9 The collected historical sources informing about droughts were evaluated according to a three-  
10 level scale, taking into account, first of all, signalled manifestations and consequences of the  
11 drought and its duration. The droughts were divided into “extreme”, “severe” and “moderate”.

12 Extreme droughts (index -3) constituted periods of no rainfall or very scarce rainfall that  
13 were long-lasting – they lasted at least one season (2–3 months and more). The principle was  
14 adopted that extreme droughts should be recorded in sources from two regions or more; even in  
15 view of the absence of sources this allows us to assume that these were droughts of an exceptional  
16 nature, having been noted by many writers. Such an extreme drought of 1473 was described,  
17 among others, in the “Annals” by Jan Długosz and, for example, in the local chronicle of Wrocław  
18 by Nicolaus Pol. When the source information indicated an extreme drought, but at the same time  
19 there appeared information, for example, about the high level of water or floods, which may have  
20 indicated heavier precipitation especially in the summer season, it was concluded that no extreme  
21 drought had taken place. In agricultural terms, extreme droughts contributed to much earlier cereal  
22 harvests; they often seriously threatened the growth and size of yield, as was mentioned in the  
23 sources. Descriptions of extreme droughts usually contain several permanent elements: severe  
24 water shortages, fires, the destruction of crops; sometimes there also appeared records about the  
25 fact that people did not remember a similar drought having occurred in their lifetime. These  
26 droughts caused water reservoirs – ponds and lakes – to dry up completely. Sometimes, and  
27 probably in an exaggerated way, sources reported the drying up of smaller rivers.

28 During extreme droughts, there were frequent records of persistent very low water levels  
29 in the largest rivers – the Odra and the Wisła (Table 3). The result was a lack of water for people  
30 and animals, halting the work of water mills in whole provinces. The consequences of drought  
31 were underlined – particularly a lack of food and high prices. Numerous fires broke out in cities,

1 villages and forests. The sources used such phrases as “*estas ferventissima et siccitas inaudita*”  
 2 [very hot and incredible summer drought], “*sidere solari plus solito effervescente et nullas dante*  
 3 *pluvias*” [extraordinary sun heat and continuous drought], “*unaufhörlich trockene Witterung*”  
 4 [unbelievably dry weather], “*alle Bäche vertrockneten*” [all streams dried up] and the like,  
 5 underlining the extreme nature of the drought. Superlative adjectives were very often used.

6

7 Table 3. Examples of descriptions of extreme droughts in 15<sup>th</sup>–17<sup>th</sup>-century sources

| Year | Description                                                                                                                                                                                                                                                                                                                                                                                                                                                                                    | Translation                                                                                                                                                                                                                                                                                                                                                                                                                                                                                                                                                            | Source                                                                                       |
|------|------------------------------------------------------------------------------------------------------------------------------------------------------------------------------------------------------------------------------------------------------------------------------------------------------------------------------------------------------------------------------------------------------------------------------------------------------------------------------------------------|------------------------------------------------------------------------------------------------------------------------------------------------------------------------------------------------------------------------------------------------------------------------------------------------------------------------------------------------------------------------------------------------------------------------------------------------------------------------------------------------------------------------------------------------------------------------|----------------------------------------------------------------------------------------------|
| 1473 | [...] <i>caumata et penuriam aquarum, adeo ut perennes aquae verterentur in aridam, et flumina Poloniae principalia ubique fuerunt permeabilia, insignis. [...] Fumabant in universis Poloniae regionibus silvae, borrae, arbusta, saltus, irremediabili igne, nec ante rescindi flamma poterat, donec ignis etiam radicem arborum voraret, ex quo ubique fragor ruentium saltuum audiebatur. Apum quoque et alveariorum arbores plurimae deletae, segetes vernaes exterminatae siccitate.</i> | [...] hot weather and a lack of water, to such an extent that the places where there had always been water dried up everywhere, and the main Polish rivers could be crossed everywhere. [...] Forests, woods, thickets and forested hills burnt with fire; there was no way to put it out, and it was impossible to extinguish the flame before the fire even devoured the root of the trees; from here you could hear the clatter of collapsing thickets. Very numerous bee and beekeeping trees were destroyed, and many spring crops were destroyed due to drought. | Długosz, vol. 12, p. 336                                                                     |
| 1540 | [...] <i>fuit in aestate horrenda siccitas adeo, ut silices, montes et valles quasi igne flagrarent, duravit haec siccitas usque ad hyemem.</i>                                                                                                                                                                                                                                                                                                                                                | [...] in the summer there was such a terrible drought that the rocks, mountains and valleys were burned down with fire; this drought lasted until winter                                                                                                                                                                                                                                                                                                                                                                                                               | Archivum vetus et novum ecclesiae archipresbyteralis Heilsbergensis, in: MHW, vol. 8, p. 597 |

|      |                                                                                                                                                                                                                                                                      |                                                                                                                                                                                                                                                              |                                      |
|------|----------------------------------------------------------------------------------------------------------------------------------------------------------------------------------------------------------------------------------------------------------------------|--------------------------------------------------------------------------------------------------------------------------------------------------------------------------------------------------------------------------------------------------------------|--------------------------------------|
| 1590 | <i>Ist ein sehr heisser truckener Sommer gewesen, also, dass auch die Landflüsse, als der Bober, Queiss, Katzbach, Weida, Olau, Lohe, und andere mehr gänzlich ausgetrucknet. Die Oder ist auch so klein worden, dass man sie an allen Orten durchwatten können.</i> | The summer was so hot [and] dry that regional rivers like the Bóbr, the Kwisa, the Kaczawa, the Widawa, the Oława, the Ślęza [Silesia, auth. suppl.] and many others dried up completely. The Odra also became very shallow, so you could cross it anywhere. | Pol, vol. 4, p. 156                  |
|      | <i>38 Wochen regnete es nicht. Die Flüsse trockneten aus.</i>                                                                                                                                                                                                        | It did not rain for 38 weeks. The rivers dried up.                                                                                                                                                                                                           | Reinhold, 1846, p. 143               |
|      | <i>Zacken und andere Flüsse trockneten völlig aus</i>                                                                                                                                                                                                                | The Kamienna and other rivers dried up completely.                                                                                                                                                                                                           | Bergemann, J.G., 1830a, p. 84        |
|      | <i>Der Bober trocknete infolge starker Hitze ganz aus.</i>                                                                                                                                                                                                           | The Bóbr dried up completely due to severe drought.                                                                                                                                                                                                          | Bergemann, J.G. 1830b, vol. 3, p. 85 |

1

2 Severe droughts that lasted almost the whole season but no longer (up to about 2–3 months) were  
3 marked with the -2 index. When they fell in the spring period of plant growth, they influenced the  
4 quality of the harvest. It was frequently reported that crops had dried up in fields on hillslopes  
5 especially exposed to the sun and with less humid soils than in the valleys. Those droughts made  
6 it difficult for people and animals to obtain water; sometimes they prevented the work of some  
7 mills on the rivers, but they did not paralyse grain milling in the entire province. Droughts were  
8 incidentally related to forests and meadows. Efforts were made to focus on those descriptions in  
9 which at least two of the phenomena described above appeared. There was no requirement to  
10 describe such droughts in more sources. Examples of descriptions of severe droughts in different  
11 historical sources are presented in Table 4.

12

13 Table 4. Examples of descriptions of severe droughts in 15<sup>th</sup>–17<sup>th</sup>-century sources

| Year | Description                                                         | Translation                                               | Source            |
|------|---------------------------------------------------------------------|-----------------------------------------------------------|-------------------|
| 1456 | <i>Fuitque anno eodem precipue circa partes nostras, ubi plures</i> | And that year there was an exceptionally great drought in | Catalogus abbatum |

|      |                                                                                                                                                                                                                                                                                                                                                            |                                                                                                                                                                                                                                                                                                                                                                            |                                                                        |
|------|------------------------------------------------------------------------------------------------------------------------------------------------------------------------------------------------------------------------------------------------------------------------------------------------------------------------------------------------------------|----------------------------------------------------------------------------------------------------------------------------------------------------------------------------------------------------------------------------------------------------------------------------------------------------------------------------------------------------------------------------|------------------------------------------------------------------------|
|      | <i>sunt agri sabulosi et argillosi, post festa paschalia siccitas magna et usque ad messem continuata. Messis autem tante humiditatis et instabilitatis,</i>                                                                                                                                                                                               | our area, where there are numerous sandy and loamy soils; it occurred after the Easter holidays and lasted until the harvest. In the harvest period it [the weather] was so wet and unstable [...]                                                                                                                                                                         | Saganensium, in: <i>Scriptores rerum Silesiacarum</i> , vol. I, p. 340 |
| 1532 | <i>Ein dürrer Sommer. Es regnete in sieben Wochen nicht. Das Getreide und die Weide verdorrete auf den Hügeln ganz aus. In etlichen Dörfern war kein gar Wasser. Auf dem Lande konnte man nicht mahlen. Zu 10. 12. 18. Meilen musste man zur Mühle führen. Die Olau trocknete und dorrete auch aus, und hatte kein Wasser bis auf Bartholomei [24.08].</i> | Dry summer. It did not rain for seven weeks. The grain and grass on the hillsides dried up. In some places there was almost no water. In the countryside, it was impossible to grind grain. One needed to go 10, 12, 18 miles to reach mills. The Oława River dried up [Silesia, auth. suppl.] and there was no water in it until the Saint Bartholomew's Day [August 24]. | Pol, vol. 3, p. 72                                                     |
| 1665 | <i>Der Sommer des Jahres 1665 wird als ungemein heiss angegehen, und soll es die ganzen Hundstage [10.07.–20.08.] hindurch auch nicht einmal geregnet haben.</i>                                                                                                                                                                                           | The summer of 1665 was incredibly hot; not even once did it rain – so called “Dog Days”.                                                                                                                                                                                                                                                                                   | Wernicke, <i>Gesch. Thorns.</i> , vol. 2, p. 321                       |

1

2 Moderate droughts – marked with the -1 index – were ones whose appearance was noticeable by  
3 people; however, they lasted for a relatively short period of time and affected crops to a limited  
4 extent. This group also includes records that seem incidental, are not confirmed in other sources,  
5 or may indicate a small range of drought, yet they were significant enough to be recorded in the  
6 sources (Table 5). There is no record of consequences (including economic ones). In the  
7 description of the drought, a superlative adjective is not used. There appear such expressions as  
8 “*dürrer Sommer*” [dry summer]. In other sources, in reference to the same period of time, there  
9 may be records that indicate, for example, rain instead of drought.

10

1 Table 5. Descriptions of moderate droughts in 15<sup>th</sup>–17<sup>th</sup>-century sources

| Year | Description                                                                                                   | Translation                                                                                            | Source                               |
|------|---------------------------------------------------------------------------------------------------------------|--------------------------------------------------------------------------------------------------------|--------------------------------------|
| 1461 | <i>Eodem anno fuit estas calidissima et fluvius Odere valde modicus, similiter et alii fluvii.</i>            | That year the summer was the hottest and the water level of the Odra River fell, as did other rivers.  | Sigismundi Rosiczii chronica, p. 78. |
| 1552 | <i>Den 5 Junii [...] nach der Vesper und grosser Dürre kam ein gewünschter Regen, aber mit grossem Wetter</i> | On June 5 [...] after the evening and after a great drought, came the desired rain with a great storm. | Pol, vol. 3, p. 158.                 |
| 1661 | <i>Es folgte aber ein dürrer Sommer.</i>                                                                      | However, a dry summer came.                                                                            | Happelius, p. 148.                   |

2

3 Therefore, relatively long periods of fifty years were adopted to assess long-term (secular)  
 4 frequencies. It should also be added that most probably in the oldest sources from the 15<sup>th</sup>–17<sup>th</sup>  
 5 centuries, primarily droughts of considerable intensity were recorded (i.e. droughts referred to by  
 6 us as severe and extreme), while those of a smaller scale (moderate) were omitted. This is due to  
 7 the nature of the sources at the time and the relatively modest number of such records. Therefore,  
 8 it can be assumed that droughts of -1, and probably in some part also droughts of -2 may be  
 9 underestimated from the perspective of historical sources. The sources for the 18<sup>th</sup> century are  
 10 definitely more precise. In the 18<sup>th</sup> century, the duration of the drought as well as its territorial  
 11 range can often be very precisely determined, though not always.

12

### 13 3.2 Dendrochronological data

14 We hypothesised that narrow tree rings are linked with drought. The limited access to water during  
 15 the vegetation season leads to a water deficit in trees and as a consequence the cambium activity  
 16 decreases and produces fewer cells, which is positively correlated with tree-ring widths (Liang et  
 17 al., 2013). De-trending of the chronology was done with the dplR software (Bunn 2008) using the  
 18 smoothing spline option, which reflects trends in the chronology better than other options. The  
 19 “n-year spline” was fixed at 2/3 the wavelength of n years (Cook et al. 1990). The residual version  
 20 of the chronology was built by pre-whitening, performed by fitting an autoregressive model to the  
 21 data with AIC model selection (Bunn 2008). At first the relationships between tree growth and  
 22 precipitation was checked. We analysed the effect of climate monthly precipitation and  
 23 temperature on tree-ring widths using the treeclim package (Zang and Biondi, 2015). Analysis of  
 24 climate growth relationships for monthly data for Toruń revealed that precipitation during the



1 vegetation season plays a significant role for both pine and oak. For example a significant positive  
 2 correlation was observed for June and July for pine, while for oak a positive correlation was  
 3 observed for the previous August and current June and a negative correlation for August (Fig. 2).  
 4 For each site the climate growth relationships were tested against monthly precipitation and  
 5 temperature data starting from 1951 and covers maximum time span depending on the length of  
 6 the chronology (Table 6). Because the time span was too short (for example for Site 2 when  
 7 chronology covers the years 1951-1986) for some extended analysis going back to previous  
 8 months, the common period from previous October to current September was taken into account.  
 9 The sum of monthly precipitation was also included, the months were selected dependably on the  
 10 significant correlation of the single months and period selected by daily data analysis.

11 Table 6. Climate growth relationships for analysed sites. Only highest correlation  
 12 coefficient are presented with level of significance,  $p < 0.05$ .  
 13

| Site number                                    | Analysed period | Highest Pearson correlation coefficient | Months with highest correlation coefficient | Meteorological station |
|------------------------------------------------|-----------------|-----------------------------------------|---------------------------------------------|------------------------|
| Region I (Baltic Province)                     |                 |                                         |                                             |                        |
| Site 1                                         | 1951–1987       | 0.378                                   | Sum of precipitation from May to June       | Koszalin               |
| Site 2                                         | 1951–1986       | 0.296 (not significant)                 | Sum of precipitation from June to July      | Gdańsk                 |
| Site 3                                         | 1951–1987       | 0.565                                   | Sum of precipitation from June to August    | Świnoujście            |
| Site 4                                         | 1175–1396       | No climate data                         | No climate data                             | No climate data        |
| Site 5                                         | 1951–1986       | 0.456                                   | Sum of precipitation from June to July      | Koszalin               |
| Region II (Masuria-Podlasie Province)          |                 |                                         |                                             |                        |
| Site 6                                         | 1951–1987       | 0.589                                   | Temperature current May                     | Suwałki                |
| Site 7                                         | 1951–1987       | 0.50                                    | Sum of precipitation from June to July      | Suwałki                |
| Site 8                                         | 1951–1985       | 0.285                                   | Sum of precipitation from July to August    | Białystok              |
| Region III (Greater Poland-Pomerania Province) |                 |                                         |                                             |                        |
| Site 9                                         | 1951–1987       | 0.485                                   | Sum of precipitation from May to July       | Poznan                 |
| Site 10                                        | 1951–1987       | -0.322                                  | Temperature, previous December              | Gorzów Wielkopolski    |

|                                       |           |                                                                                |                                                            |                                       |
|---------------------------------------|-----------|--------------------------------------------------------------------------------|------------------------------------------------------------|---------------------------------------|
| Site 11                               | 1951–2015 | 0.334<br>-0.334                                                                | Sum of precipitation from May to June, temperature in June | Toruń                                 |
| Site 12                               | 1249–1490 | No climate data                                                                | No climate data                                            | No climate data                       |
| Site 13                               | 1951–2015 | 0.443                                                                          | Sum of precipitation from May to July                      | Toruń                                 |
| Site 14                               | 1100–1468 | No climate data                                                                | No climate data                                            | No climate data                       |
| Region IV (Masovia-Podlasie Province) |           |                                                                                |                                                            |                                       |
| Site 15                               | 1951–1985 | -0.316                                                                         | Temperature, previous December                             | Warszawa                              |
| Region V (Silesia Province)           |           |                                                                                |                                                            |                                       |
| Site 16                               | 1886–1984 | >0.4<br>Precipitation data not presented due to lower statistical significance | Temperature of February and March for pine                 | Opole, Wrocław, Katowice and Racibórz |
| Site 17                               | 1951–1987 | 0.376                                                                          | Sum of precipitation from May to June                      | Wrocław                               |
| Site 18                               | 1568–2010 | Only pointer years were analysed                                               |                                                            |                                       |
| Region VI (Lesser Poland Province)    |           |                                                                                |                                                            |                                       |
| Site 19                               | 1915–1986 | 0.324 (not significant)                                                        | Temperature in February                                    | Kraków                                |
| Site 20                               | 1951–1989 | 0.314<br>-0.323                                                                | Sum of precipitation from May to July, temperature in June | Lublin i Radawiec                     |
| Site 21                               | 1881-1999 | >0.4                                                                           | Temperature in March                                       | Kraków                                |
| Site 22                               | 1881-1999 | >0.4                                                                           | Temperature in February                                    | Kraków                                |

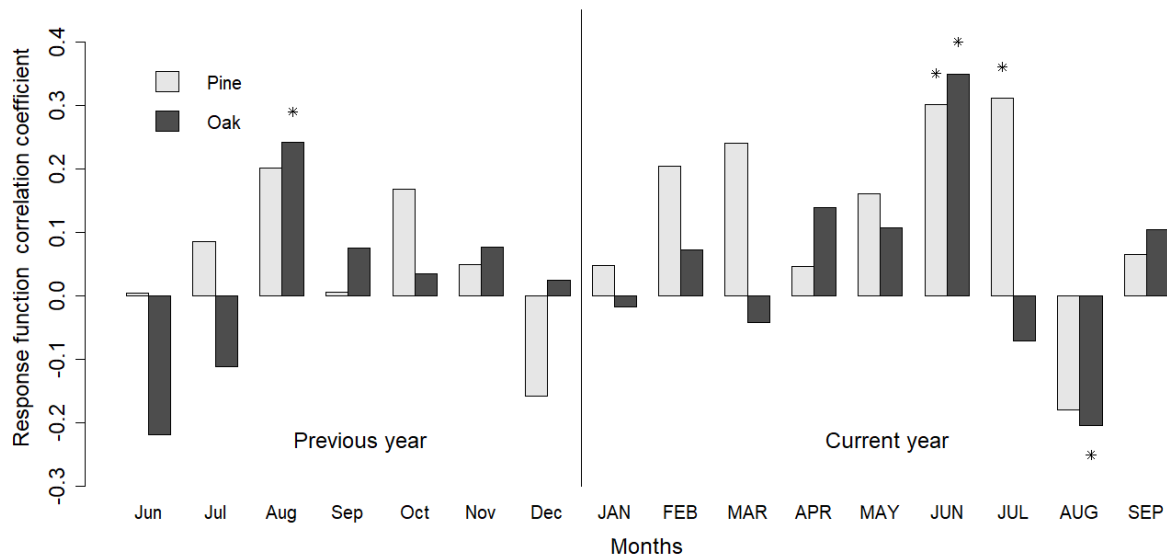

1

2 Fig. 2. Climate growth relationships between tree rings in pine (grey bars) and oak (black bars)  
 3 and monthly totals of precipitation. Key: Asterisks indicate statistically significant correlation  
 4 coefficients at the level of 0.05. Climate data were taken from Toruń Meteorological Station.

5

6 Next we used daily data for Toruń and tree-ring chronologies of pine and oak representing Region  
 7 III. Daily data shows more precisely the period of the year which influences tree growth.  
 8 According to previous findings, the climate growth relationships are comparable at different sites  
 9 in Poland (Zielski et al., 2010), so we used the relationships between daily data and Site 11 and 13  
 10 as a model for the rest of our study sites. The reason for this generalisation was also the limited  
 11 access to daily data. A period of 90 days with the 1-year lag for the years 1947–2015 was used to  
 12 find the significant relationships between the daily precipitation data and indexes of tree rings. For  
 13 this purpose we used the dendroTools package (Jevšenak and Levanič, 2018). The optimal window  
 14 of days was revealed to be from May 6 to August 3 for pine with maximal correlation coefficient  
 15 0.435, and from April 21 to July 19 for oak with maximal correlation coefficient 0.305. The sums  
 16 of daily precipitation for these periods were summed and correlated with indexed growth in years  
 17 of growth reduction (narrow rings) and growth recovery (wide rings). The correlation coefficient  
 18 is 0.79 ( $p < 0.05$ ) for pine, and 0.65 ( $p < 0.05$ ) for oak. Next, the same summed daily precipitations  
 19 for the selected periods were correlated with the remaining tree ring indexes (after exclusion of  
 20 wide and narrow ring indexes). The correlation coefficient is 0.40 for pine and 0.16 for oak.

21 To determine the pointer years we used the dplR package (Bunn, 2008). The minimum  
 22 absolute relative radial growth variation, above which the growth change from year  $t-1$  to  $t$  is  
 23 considered significant, was 10. Any year in which more than 95% of trees per site displayed  
 24 significant relative radial growth variations above 10 was qualified as “extreme reduction”; “great

1 reduction” was determined as between 85–95% of trees; and “moderate reduction” was between  
2 75% and 85%.

3

### 4 **2.3 Instrumental data**

5 As results from Table 2, for the analysis of droughts in the instrumental period, eight long-term  
6 series of monthly totals of precipitation have been used. All these precipitation series were checked  
7 for completeness. The few data gaps in the analysed series were completed using homogenised  
8 precipitation series from the nearest stations. For this purpose, a simple method of constant  
9 quotients was utilised (Pruchnicki, 1987). However, due to the lack of available reference series,  
10 such a procedure was not used to fill data for the period 1880–1884 for Orzysz. Homogenisation  
11 of all the used precipitation series was checked using the AnClim software (Štěpánek et al., 2009).

12 On the basis of the completed series of atmospheric precipitation, the possibility of  
13 obtaining a synthetic precipitation index for the whole country was tested. A similar method was  
14 adopted in Brázdil et al. (2007) to determine drought indices in the Czech Republic for the period  
15 1881–2006. In Poland, Kożuchowski (1985) presented a 100-year series of average areal annual  
16 atmospheric precipitation for 1881–1980 (his Table 3) calculated from data from 12  
17 meteorological stations using precipitation regression equations relative to altitude above sea level.  
18 Miętus (1996), in turn, presented mean areal precipitation for the Coast area. For the analysis, we  
19 took 30-year moving correlation coefficients ( $r$ ) for monthly totals of precipitation counted for the  
20 period 1901–2000. All correlation coefficients were statistically significant ( $p < 0.05$ ) with values  
21 varying from 0.46 to 0.71 (see Table 6, upper part). Only the Kraków series had a significantly  
22 lower value of  $r$  (the highest value of 0.33 described the relationship between Kraków and  
23 Wrocław). For annual precipitation totals in the period 1951–2000, Kożuchowski and Żmudzka  
24 (2003) obtained only slightly higher values of correlation coefficients, varying from 0.6 to 0.8.  
25 Unsatisfactory results of  $r$ , particularly related to the series for Kraków, suggested that we should  
26 not construct monthly precipitation series for the entire Poland. It seems that the number of long-  
27 term precipitation series is probably relatively too small for a country of such area (312,679 km<sup>2</sup>).  
28 Further analysis was thus carried out on regions delimited by a landscape criterion, though this  
29 excludes mountains, whose atmospheric precipitation is spatially and temporally far more variable  
30 (Kożuchowski, 1985).

31

32 Table 76. Correlation coefficients between monthly totals of atmospheric precipitation  
33 (upper part of table) and SPI1 (lower part of table) in area of Poland calculated based on data from  
34 the period 1901–2000

| Station | Toruń                                                                               | Koszalin | Gdańsk | Orzysz-Mikołajki | Poznań | Warszawa | Żagań-Wrocław | Kraków |
|---------|-------------------------------------------------------------------------------------|----------|--------|------------------|--------|----------|---------------|--------|
| Toruń   |  | 0.56     | 0.67   | 0.62             | 0.69   | 0.62     | 0.61          | 0.29   |

|                  |             |             |             |             |             |             |             |             |
|------------------|-------------|-------------|-------------|-------------|-------------|-------------|-------------|-------------|
| Koszalin         | <i>0.56</i> | <del></del> | <i>0.71</i> | <i>0.55</i> | <i>0.55</i> | <i>0.52</i> | <i>0.46</i> | <i>0.20</i> |
| Gdańsk           | <i>0.62</i> | <i>0.69</i> | <del></del> | <i>0.66</i> | <i>0.58</i> | <i>0.61</i> | <i>0.55</i> | <i>0.26</i> |
| Orzysz-Mikołajki | <i>0.55</i> | <i>0.53</i> | <i>0.60</i> | <del></del> | <i>0.55</i> | <i>0.71</i> | <i>0.54</i> | <i>0.31</i> |
| Poznań           | <i>0.66</i> | <i>0.57</i> | <i>0.55</i> | <i>0.49</i> | <del></del> | <i>0.58</i> | <i>0.68</i> | <i>0.25</i> |
| Warszawa         | <i>0.58</i> | <i>0.48</i> | <i>0.52</i> | <i>0.63</i> | <i>0.53</i> | <del></del> | <i>0.61</i> | <i>0.28</i> |
| Żagań-Wrocław    | <i>0.56</i> | <i>0.44</i> | <i>0.47</i> | <i>0.45</i> | <i>0.64</i> | <i>0.53</i> | <del></del> | <i>0.33</i> |
| Kraków           | 0.00        | -0.03       | -0.03       | -0.03       | -0.03       | -0.02       | 0.00        | <del></del> |

*values statistically significant at the level of  $p < 0.05$  are shown in italic*

1

2

3 The aim of analysis of instrumental series was to calculate the number, length and category  
4 of droughts in the area of Poland since 1722, i.e. for almost 300 years. The Standardised  
5 Precipitation Index (SPI, McKee et al., 1993) was calculated from monthly precipitation totals to  
6 explore the occurrence of droughts in the analysed locations (Table 2). This index is one of the  
7 simplest methods used to identify meteorological droughts, since it uses only monthly totals of  
8 precipitation and is therefore widely used in the literature. Osuch et al. (2015) state that the SPI is  
9 used for both research and operational purposes in over 60 countries. The SPI index is also most  
10 popularly used in Poland (e.g. Łabędzki, 2007; Kalbarczyk, 2010; Bąk et al., 2012; Bartczak et al.,  
11 2014; Osuch et al., 2015, 2016; Bąk and Kubiak-Wójcicka, 2017). What is more, the SPI is used  
12 also by two institutes mentioned in Section 1 (IMGW-PIB, and the Institute of Technology and  
13 Life Sciences [ITP]) and also by the Institute of Soil Science and Plant Cultivation, which is  
14 responsible for agricultural drought monitoring in Poland (for more details see Łabędzki and Bąk,  
15 2014). Hence our decision to also use this index in our work.

15

16

17

18

19

20

21

22

23

24

25

26

27

28

29

30

The program SPI Generator (National Drought Mitigation Center, University of Nebraska),  
was used to perform this analysis. SPI was initially calculated for 1-, 3- 6-, 12- and 24-month time  
scales. Further analysis was, however, done using SPI calculated only for 1-, 3- and 24-month time  
scales. All of them represent meteorological droughts, from short-term to long-term, respectively.  
The last two (SPI3 and SPI24) can also be used as a good proxy for agricultural and hydrological  
droughts, respectively. For climate conditions in Poland it was shown that there exists a strong  
spatial relationship of SPI values (Table 6, lower part). Significant empirical relations were also  
found between SPI and pure agricultural and hydrological indices. Łabędzki et al. (2008) found  
high correlation coefficients ( $|r| > 0.7$ ) between SPI and some agricultural indices such as: crop  
drought index (CDI), water deficit (N) and relative duration of soil moisture deficit ( $t_{def}$ ). On the  
other hand, a much weaker relation ( $r < 0.5$ ) was found between SPI24 and hydrological droughts  
estimated based on SWI-24 (24-month standardised water level index) for the Wisła river in Toruń  
by Bąk and Kubiak-Wójcicka (2017). According to them, this relation was reduced by the  
influence of external factors (the hydropower plant in Włocławek located in middle part of the  
river, major groundwater basin), and climate factors appearing in the upper and middle parts of  
the river basin.

1 To identify droughts (dry months), the criterion proposed by McKee (1993) and modified  
2 for Polish climate conditions by Łabędzki (2007) was used. Droughts were divided into three  
3 categories based on SPI values: moderate droughts (-0.50 to -1.49), severe (-1.50 to -1.99), and  
4 extreme ( $\leq -2.00$ ). Methods that identify multi-month droughts using the SPI calculated for  
5 different, rigidly defined numbers of consecutive months (3, 6, 12 or 24) simplify analysis,  
6 especially in terms of drought duration and calculating the cumulative intensity of the whole  
7 phenomenon. Therefore, in this work, we have adopted the following criteria to identify droughts  
8 and determine their duration. Firstly, instances of an SPI1 value within any of the above ranges  
9 for only a single month were considered irrelevant. Secondly, a drought was considered to be at  
10 least two consecutive months during which the SPI1 value was  $\leq -0.50$ . Thus identified, a drought  
11 was determined both in terms of duration and by category. Thirdly, drought category was  
12 determined by the dry month of lowest SPI1 value. A drought was thus considered extreme if the  
13 SPI1 value for at least one of the drought months was  $\leq -2.00$ . If the SPI1 of the driest month within  
14 a particular instance of drought was between -1.50 and -1.99, the drought was determined to be  
15 severe. The remaining droughts were qualified as moderate. Number of droughts was determined  
16 for years and for climatological seasons. A drought's final month determined its season.

17 Drought is a widely occurring phenomenon, but its frequency is extremely limited within  
18 particular long-term periods. For this reason, it was decided to group numbers of droughts into  
19 longer periods. For a fuller comparison of drought occurrence identified on the basis of  
20 dendrochronological data (narrow rings), we used instrumental data to calculate the number and  
21 duration of droughts within ten-year periods, starting from the slightly shorter period 1722–1730,  
22 through full decades, to the five-year period 2011–2015. Next, we also summed the number of  
23 droughts by 50-year period, also determining seasons in this case, just as we did when analysing  
24 the documentary data.

25 For the purpose of comparison of SPI1 values (meteorological droughts) against historical  
26 indices (-1, -2 and -3) the following assumptions were established: the -1 index was attributed to  
27 SPI1 values ranging from -0.50 to -1.49; -2 for the range -1.50 to -1.99; and -3 for SPI1  $\leq -2.00$ .  
28 Frequency of occurrence of meteorological droughts for the instrumental period was calculated  
29 for standard meteorological seasons (Dec–Feb, Mar–May, etc.) as well as for May–July. This  
30 allowed for comparison of the occurrence of droughts against their statistics available in  
31 documentary evidence (seasons) and dendrochronological data (May–July). The last period was  
32 added because for this time a significant influence of precipitation on tree-ring widths in Poland  
33 was found (see Sect. *Methods*). It was revealed that most of the growth reduction (negative pointer  
34 years) was related to the occurrence of drought. Thus, years with extreme, great and moderate tree  
35 growth reductions can roughly, and with a large probability, indicate the occurrence of extreme,

1 severe and moderate droughts, respectively. In the case of documentary data such droughts were  
2 described using indices -3, -2 and -1.

3 As mentioned in Section 3.1, information about droughts in historical times is rather  
4 heavily underestimated, in particular in the case of moderate droughts, and therefore documentary  
5 identified droughts of categories -2 and -3 have frequently been used for the purpose of comparison  
6 against other sources. Such an approach also increases the probability that identified droughts  
7 occurred in large part of Poland. In addition, to be sure that they were caused only by climate, the  
8 assumption of their occurrence in minimum two geographical regions was usually also utilised.  
9 On the other hand, for comparison of droughts delimited using dendrochronological and  
10 instrumental data, all categories of them were used.

11 The number of months  $N_i$  in each class of drought intensity (moderate, severe and extreme)  
12 was computed for the 1- 3-, and 24-month timescales. Then the number of droughts per 100 years  
13 was calculated according to the following formula proposed by Łabędzki (2007):

$$N_{i,100} = \frac{N_i}{i \cdot n} \cdot 100$$

14  
15  
16  
17 where:

18  $N_{i,100}$  – the number of droughts for a timescale  $i$  in 100 years

19  $N_i$  – the number of months with droughts for a timescale  $i$  in the  $n$ -year set

20  $i$  – timescale (1, 3, 24, months)

21  $n$  – the number of years in the particular study data set

22

## 23 **4. Results**

### 24 **4.1 Droughts in Poland based on documentary data**

25 It seems that droughts were not very frequent in Poland. In particular regions (including droughts  
26 presented in sources as nationwide, and therefore also noticeable in individual regions) in total  
27 from 33 to 71 droughts were recorded between 1451 and the end of the 18<sup>th</sup> century (Fig. 3). Most  
28 of those were recorded in Pomerania and Silesia, and the least in Greater Poland, Masuria and  
29 Mazovia (Figs 3 and 4). This is undoubtedly not a reflection of the frequency of droughts in  
30 individual regions, but a consequence of the sources preserved for each region. Without a shadow  
31 of doubt, the richest and most accurate sources come from two regions: Pomerania (especially  
32 from big cities like Gdańsk, Toruń and Elbląg) and Silesia. It very often happens that one drought  
33 is described in many sources from the region; moreover, it is confirmed by records referring to the  
34 entire territory of Poland. A drought described in this way can be analysed more accurately. The  
35 sources from Greater Poland, Mazovia and Masuria are definitely poorer. Consequently, it is

1 probable that the number of droughts in these regions was actually higher, and close to the number  
2 of droughts in Silesia or Pomerania.

3 Information that refers to the same year and comes from different regions confirms a larger  
4 territorial range of drought. This does not mean, however, that in cases where such information  
5 was preserved only for one of the regions, other areas were not affected by drought. This lack of  
6 reports may have resulted from the lack of appropriate sources, and not from the fact that there  
7 was no drought in a given region. These numbers undoubtedly depend on the surviving sources  
8 and reflect part of the actual state of affairs. In order to partially compensate for these source  
9 deficiencies, it was assumed that the records referring to drought in the whole country refer  
10 simultaneously to each of the six identified regions.

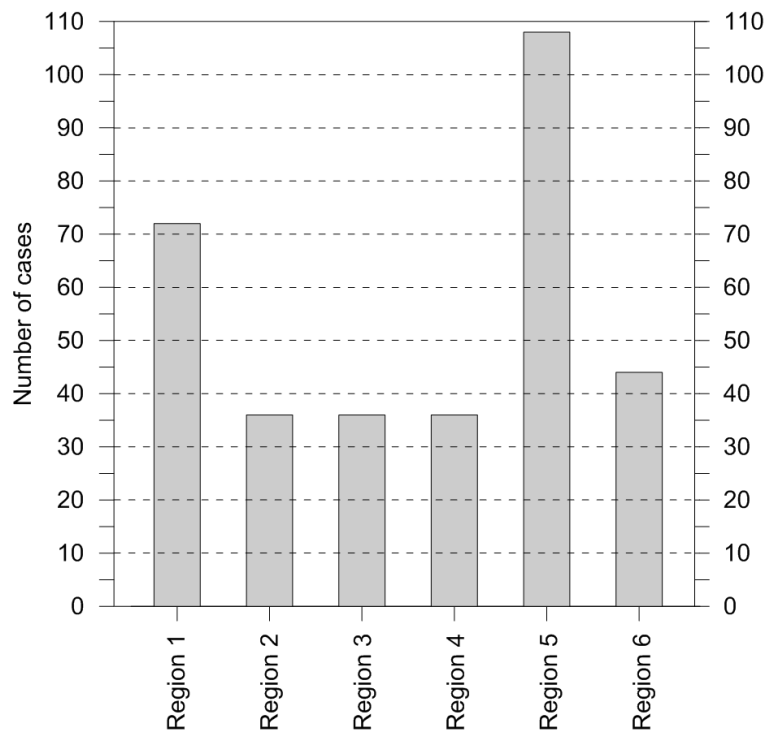

11

12 Fig. 3. Number of years with droughts in six geographical regions of Poland (including information  
13 related to the whole country) 1451–1800. See Table 2 or Fig. 4 for names of regions.



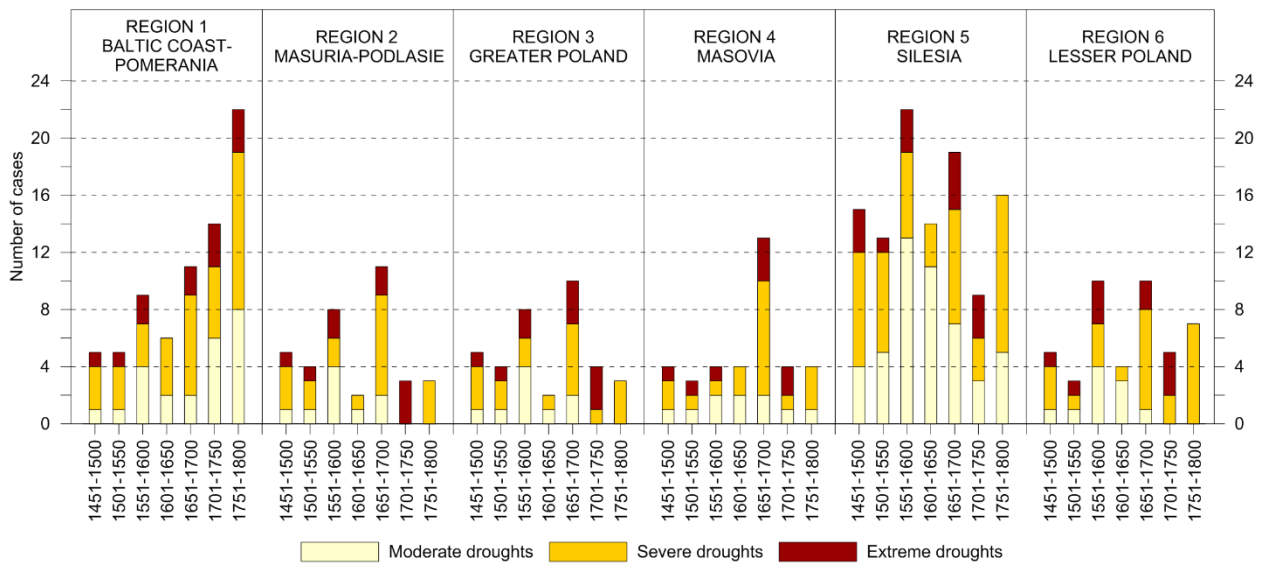

1

2 Fig. 4. Frequency of occurrence of three categories of droughts in six distinguished  
 3 geographical regions in Poland in 50-year periods, 1451–1800

4 We also calculated the frequency of all droughts occurring (Fig. 5). In the chronological  
 5 order in the periods of 50 years, the number of extreme droughts (-3) never exceeded five; in the  
 6 first half of the 16<sup>th</sup> century only the drought of 1540 was recognised as such, while in the first half  
 7 of the 17<sup>th</sup> century, extreme droughts were completely absent (Fig. 5). It seems that extreme  
 8 droughts, whose total number in the period 1451–1800 was 17, were regularly recorded in sources,  
 9 and this information is quite reliable.

10

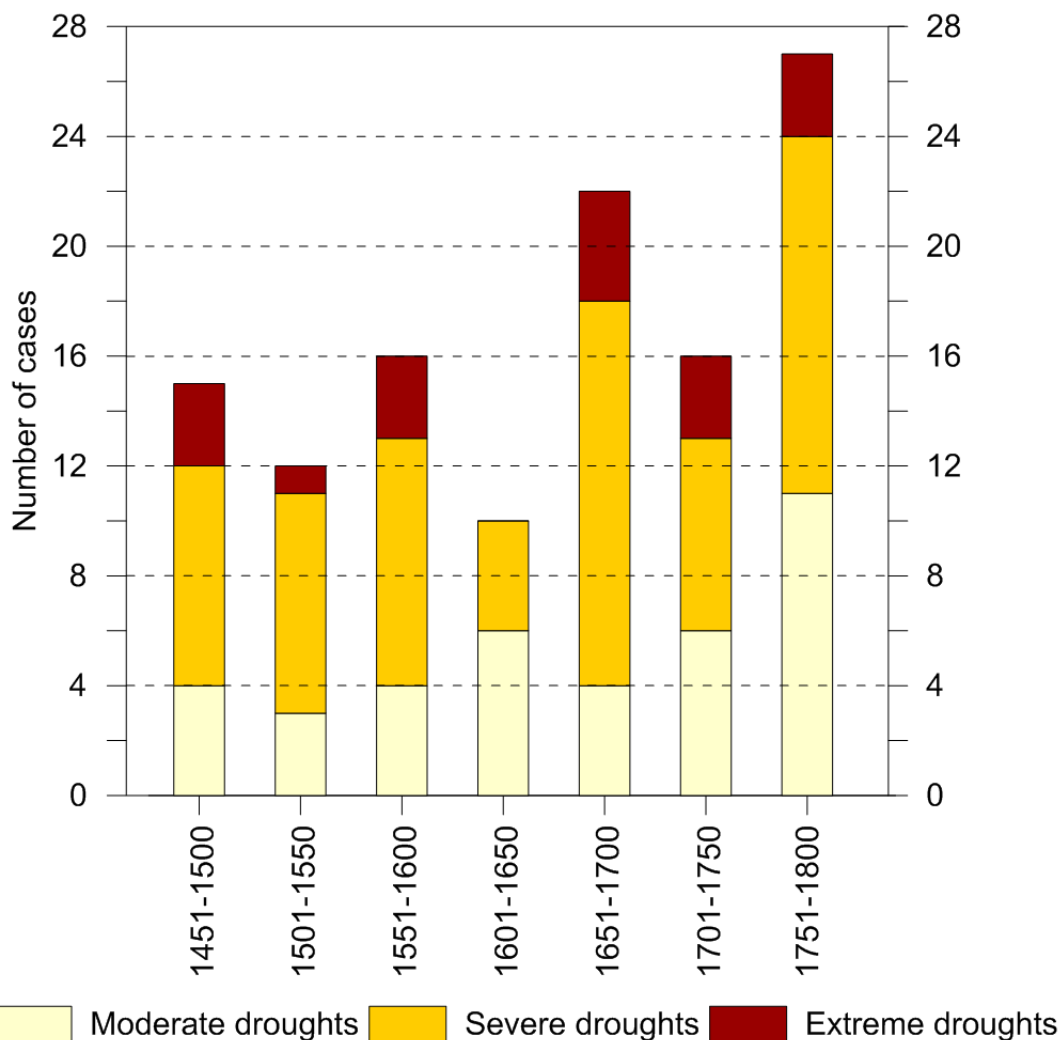

1

2 Fig. 5. Frequency of occurrence of three categories of droughts in Poland in 50-year periods, 1451–  
3 1800

4 The number of severe droughts (-2) was usually between four and nine in particular periods  
5 of fifty years. Many more droughts belonging to this category were recorded in the second half of  
6 the 17<sup>th</sup> century and in the second half of the 18<sup>th</sup> century; their numbers were respectively 14 and  
7 13 (Fig. 5).

8 However, the total frequency of extreme (-3) and severe (-2) droughts amounted to 80 and  
9 ranged from 4 to 12 in particular fifty-year periods, except for the second half of the 17<sup>th</sup> century  
10 and the second half of the 18<sup>th</sup> century, when there occurred as many as 18 and 16 droughts,  
11 respectively (Fig. 5). The increase in the number of identified droughts in the second half of the  
12 17<sup>th</sup> century was certainly due to the availability of detailed weather records from the period 1656–  
13 1685 taken from the memoirs of Jan Antoni Chrapowicki (Nowosad et al., 2007). However, the  
14 minimum number of droughts (only 4) took place in the first half of the 17<sup>th</sup> century (Fig. 5), for  
15 which, in turn, we recorded significant losses in the sources.

16 The number of moderate droughts (-1) varied in all 50-year periods from 3 to 6, except for  
17 the second half of the 18<sup>th</sup> century, when there were recorded as many as 11 droughts belonging

1 to this category (Fig. 5). A larger number of such droughts starting from the beginning of the 18<sup>th</sup>  
2 century undoubtedly results from regional sources being more accurate. In this century, many  
3 historical sources were created; they now allow for a fairly accurate reconstruction of the weather  
4 conditions, including the appearance of smaller droughts and prolonged shortages of rainfall.

5 Spring (31) and summer (37) droughts prevailed among the recorded droughts. Also,  
6 droughts in spring–summer were often mentioned (22), but much less frequently in summer and  
7 autumn (4). Rare were droughts that occurred only in autumn (4). Winter droughts were reported  
8 only in three years. In the case of many reports mentioning “a drought occurring this year” it is  
9 difficult to decide what the time of its occurrence was.

10 Nevertheless, the findings should be treated with some caution. The specificity of the  
11 chronicle’s narrative was that weather phenomena were recorded in the case of their extreme rare  
12 character, or because of their consequences for human existence. Droughts undoubtedly posed a  
13 serious threat to crops during periods of plant growth – above all in spring and summer. In the case  
14 of winters, the lack of snowfall could hardly be perceived as a manifestation of drought.

#### 15 16 **4.2 Droughts in Poland based on dendrochronological data**

17 Twenty-two local chronologies of trees (pine, oak, and fir) from Poland were taken into account  
18 for detecting negative pointer years, showing narrow rings. In a year in which we have narrow  
19 rings at more than 1 site, we count this pointer year as a “multiple observation” year, whereas, in  
20 a year with only one observation, at one site, we call it a year “without multiple observation”. In  
21 total, 758 pointer years with multiple observations were detected and 432 years without multiple  
22 observations. There are 237 multiple observation years of extreme reduction, 122 of great  
23 reduction, 252 of moderate reduction and 147 negative pointer years from the literature (Opała and  
24 Mendecki, 2014; Opała, 2015; Szychowska-Krapiec, 2010) (Fig. 6). The number of pointer years  
25 in selected 50-year periods varies (Fig. 7). At least 30 pointer years were noted within the years  
26 1401–1450 and within each of the 50-year intervals from 1701 to 1950. The evidently smallest  
27 number of negative pointer years occurred in the first 150 years (Fig. 7). In the years 996–1000,  
28 drought did not occur, and therefore this period was omitted in Figures 6 and 7. However the small  
29 number of pointer years from 996 to 1200 may be related to the low number of samples. This  
30 period is called as medieval climate anomaly and reconstruction for northern-central Europe  
31 revealed considerably drier conditions for this years (Scharnweber et al., 2019). This period is  
32 relatively dry in for The number of chronologies varies and depends on region. More chronologies  
33 in the last 300 years result from existing old trees. It also led to the detection of more pointer years.  
34 According to Neuwirth et al. (2007) during extreme climatic conditions trees react in the same  
35 way, but during years of less pronounced weather conditions regional differences in growth

- 1 reactions increase. Narrow rings observed in the same year in trees from different regions suggests
- 2 extreme climatic conditions.

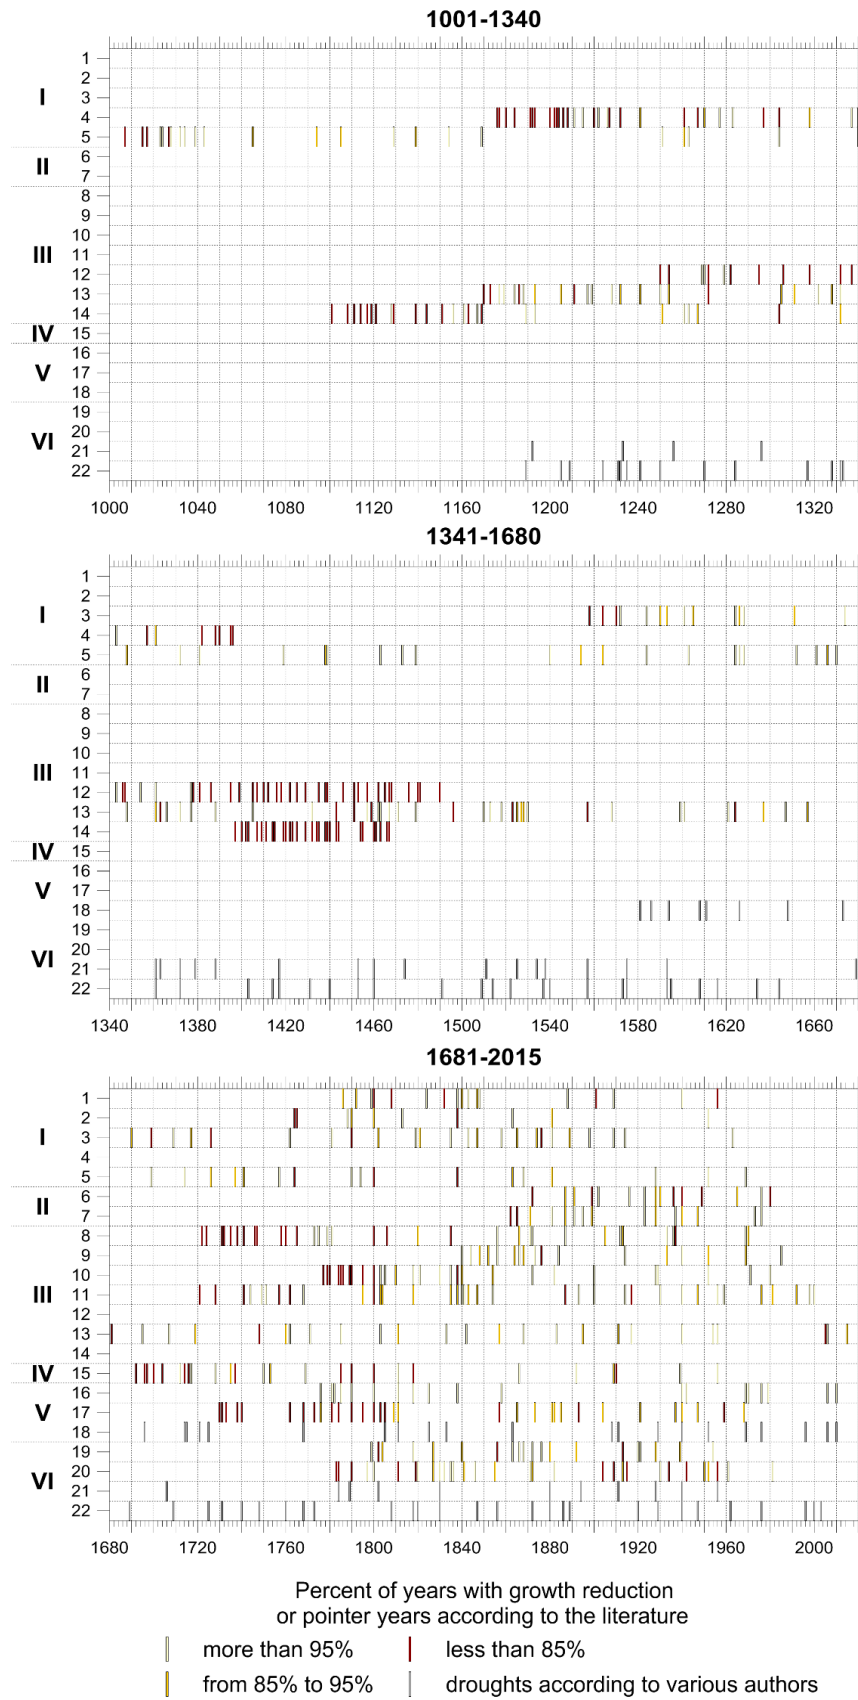

3

4 Fig. 6. Pointer years in Poland, 1001–2015

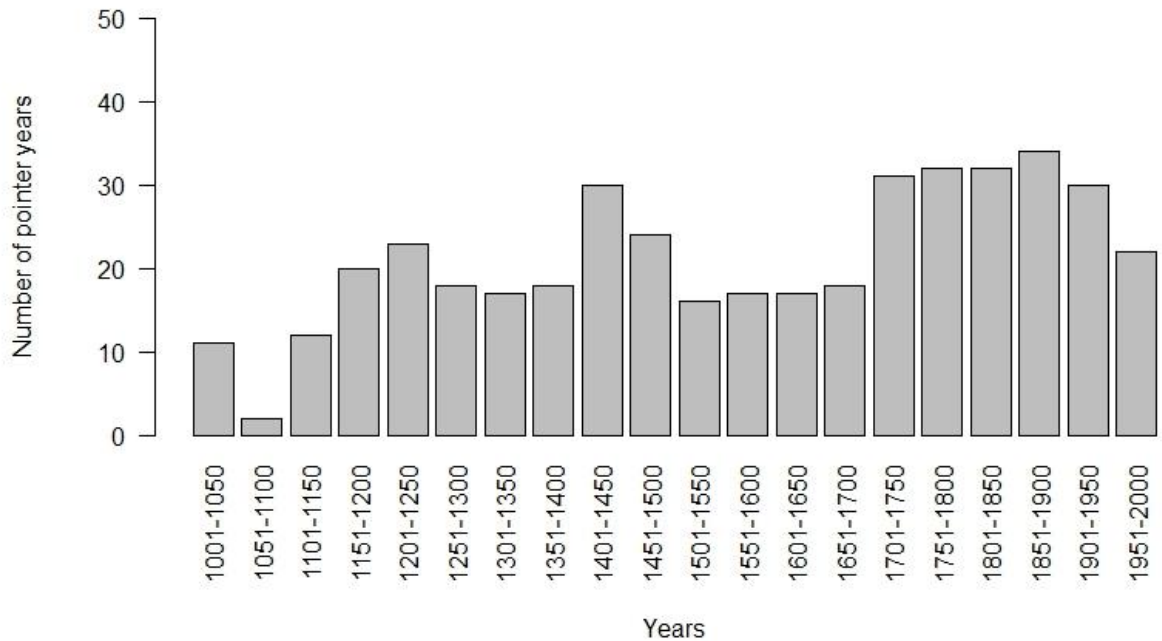

1  
 2 Fig. 7. Number of negative pointer years (without multiply observation – i.e. narrow  
 3 rings in 1976 were observed on six samples but are treated as a one-pointer year) in  
 4 Poland in 50-year periods, 1001–2000.

5  
 6 **4.3 Droughts in Poland based on instrumental data**

7 Instrumental observations of precipitation in Poland are among the longest-standing in the world  
 8 (Filipiak 2007). As results from Table 2, they are available since 1722. In Figure 8 we present the  
 9 SPI calculated for eight sites in Poland for 1-, 3-, and 24-month time scales. The values of SPI3  
 10 and SPI24 were filtered by 10-element and 30-element low-pass Gauss filters, respectively, in  
 11 order to more clearly distinguish long-term dry periods. The analysis of Figure 8 reveals that the  
 12 occurrence of droughts in different areas of Poland shows both similarities and discrepancies. It is  
 13 very clear that in northern and central Poland, a long-term (24 months’ duration, red line) and  
 14 extreme drought occurred at the threshold of the 1850s/60s. Almost one hundred years later (at the  
 15 threshold of the 1940s/50s) such a strong drought was present across the entire area of Poland (Fig.  
 16 8). Except for Kraków, and also Gdańsk in the last few years, severe droughts have not been  
 17 observable at the turn of the 21<sup>st</sup> century. In Silesia, a very dry period occurred for almost the entire  
 18 first half of the 19<sup>th</sup> century, and then significantly less severe droughts occurred here only in the  
 19 1950s and 1990s. For the 18<sup>th</sup> century we have mainly information for Gdańsk. Figure 8 shows  
 20 that dry periods (moderate droughts) occurred here only at the threshold of the 1750s/60s and in  
 21 the mid-1770s. The most extreme droughts in different parts of Poland occurred in different times.  
 22 For example, in Gdańsk at the threshold of the 1910s/20s, in Koszalin and Orzysz-Mikołajki in

- 1 the 1850s, in Toruń in the 1910s, in Poznań in the 1980s, and in Kraków in the 1980s and 1990s
- 2 (Fig. 8).

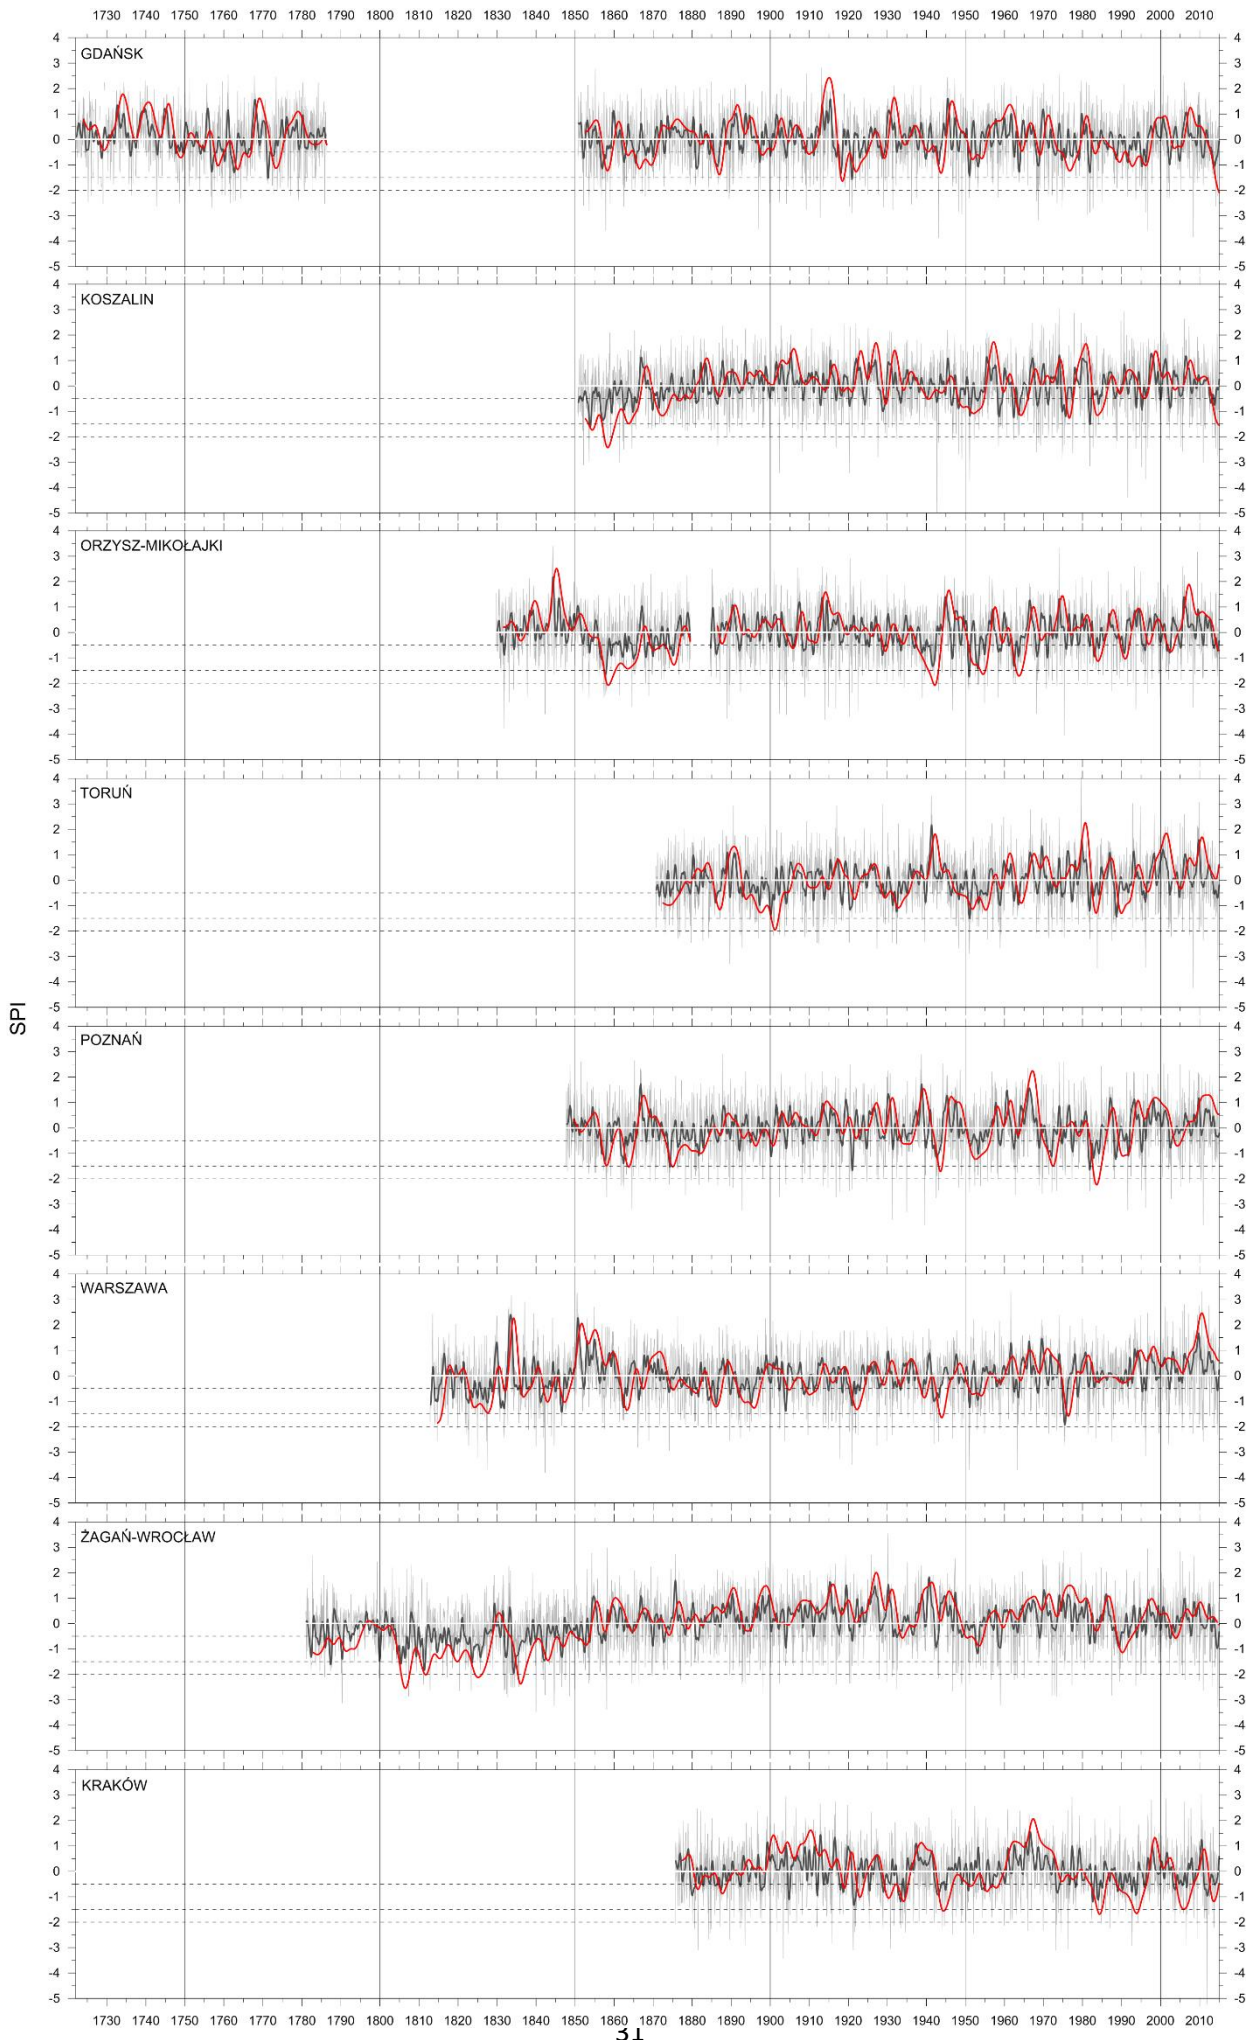

1 Fig. 8. Variability in SPI: 1-month (grey curve), 3-month (black curve) and 24-month (red curve)  
2 calculated from the Polish instrumental series listed in Table 2 (oriented from north to south) in  
3 the period 1722–2015. SPI-3 and SPI-24 were filtered by 10-element and 30-element low-pass  
4 Gauss filters, respectively. Dashed lines indicate thresholds taken for distinguishing droughts  
5 categories (see Section Methods).

6

7 Trend coefficients calculated for three types of SPI (SPI1, SPI3, and SPI24) are very small  
8 and not statistically significant in all study regions. This means that long-term frequency of  
9 droughts in Poland has been stable for the last two or three centuries.

10 The number of moderate, severe, extreme and all-category droughts (see Section *Methods*  
11 for definitions) in ten-year periods calculated from the Polish instrumental series (oriented from  
12 north to south) in the period 1722–2015 is presented in Figure 9. In the period 1876–2015, for  
13 which complete series of SPI are available for all study sites, the number of all-category droughts  
14 (Fig. 9D) varies mainly in the ranges 3–4 and 8–12 per decade. Below the lower threshold of this  
15 range we must mention the occurrence of only two droughts in the decade 2001–2010 in  
16 Warszawa. On the other hand, this range of frequency was exceeded in only three decades. The  
17 greatest 10-year number of all-category droughts (14) in the study period was noted in Gdańsk in  
18 the decade 1881–1890. In another two decades (1951–1960 and 1991–2000) 13 droughts occurred  
19 in Toruń and Kraków, respectively (Fig. 9D). Two decades 1851–1860 and 1861–1870 were very  
20 dry in Poland, in particular in its northern and western parts, and the number of droughts varied  
21 between 6 and 10 per decade. For pre-1850, the information about drought occurrence is  
22 significantly sparser, but it can be stated that in both areas for which data exist (Silesia and  
23 Masovia) the number of droughts in the first half of the 19<sup>th</sup> century (8–14 per decade) was higher  
24 than in the rest of the study period. The contrast is particularly great for Silesia (see also Fig. 8).  
25 The number of droughts occurring in the 18<sup>th</sup> century varied from 4 to 8–9 per decade and was  
26 typical as in the rest of the study period (Fig. 9).



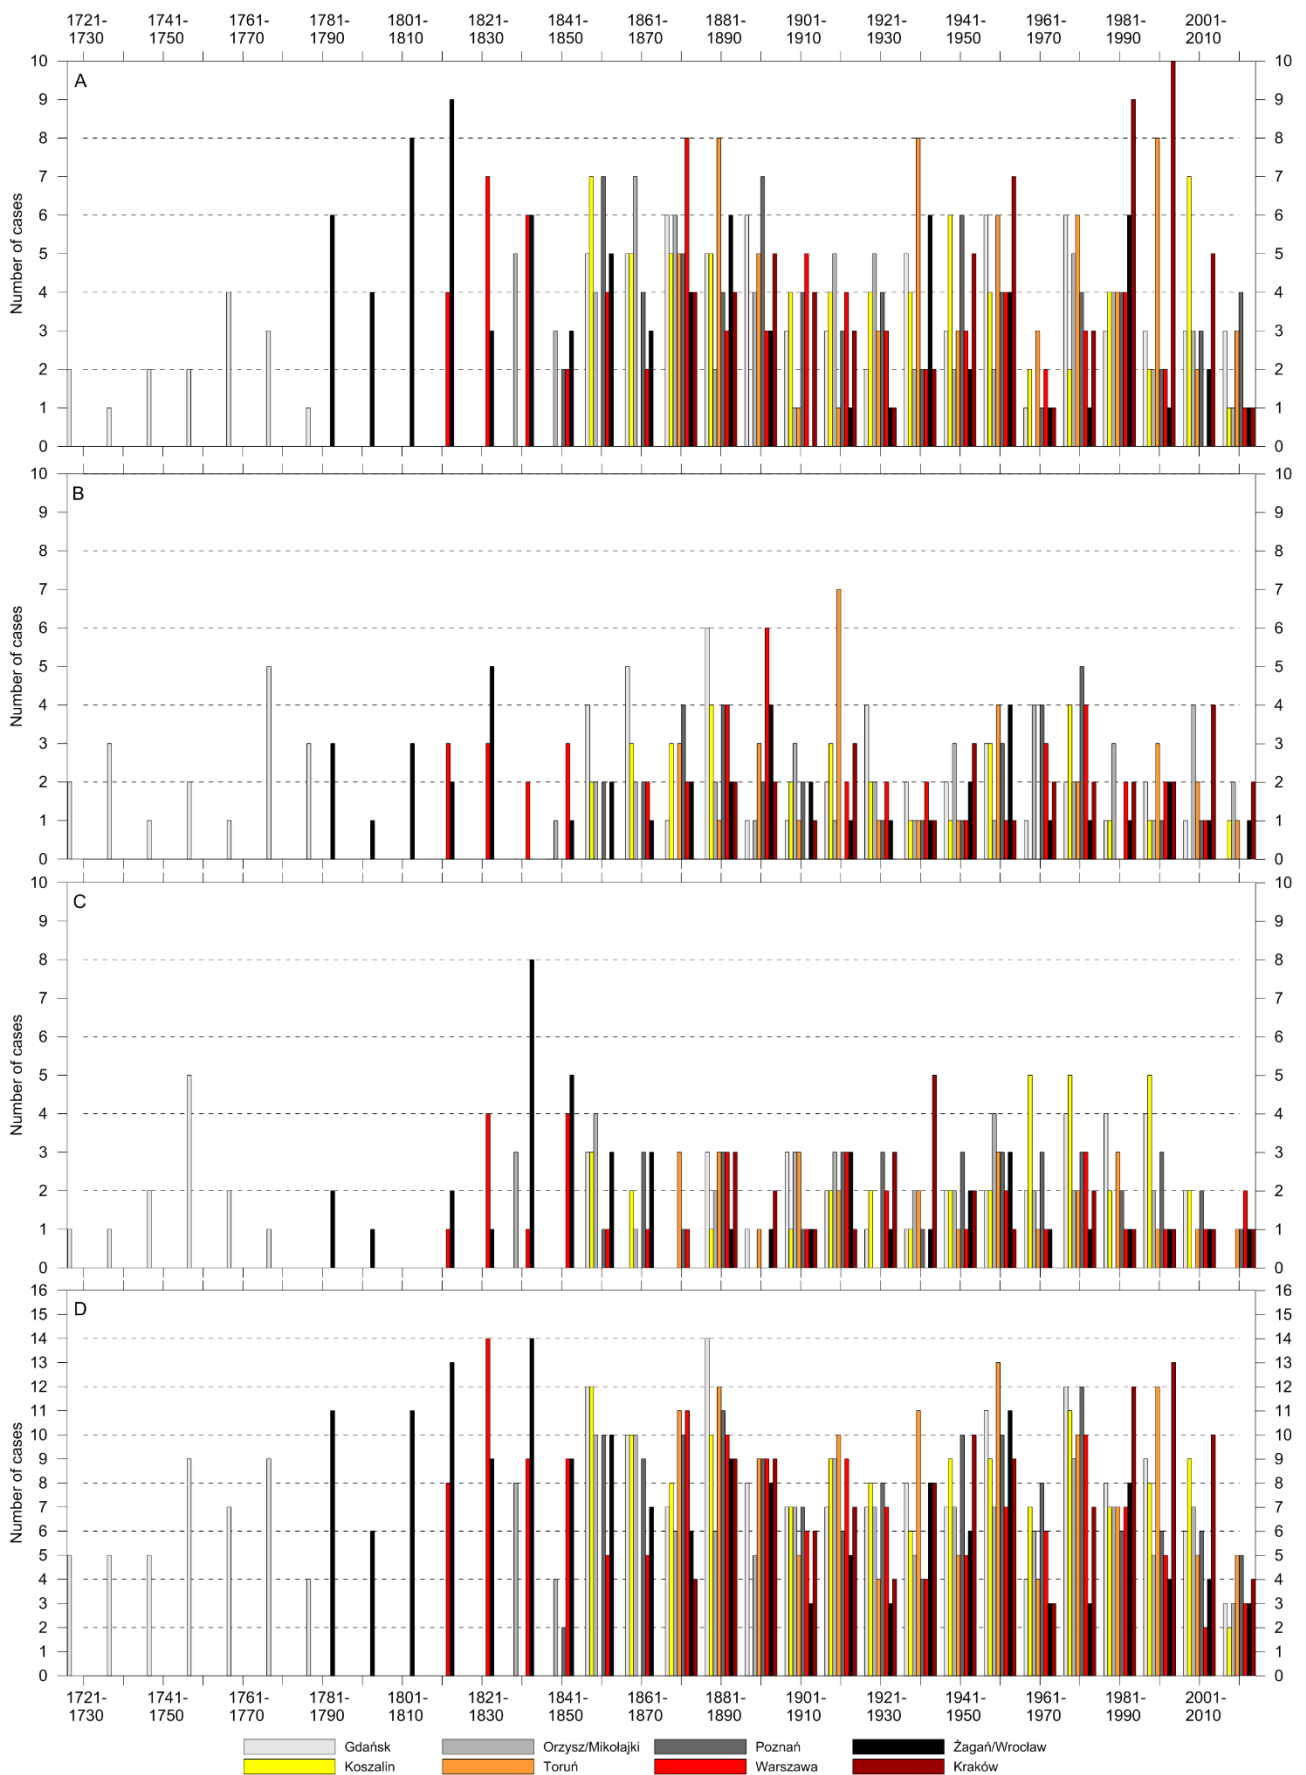

1  
2  
3  
4  
5

Fig. 9. Decadal frequency of droughts in Poland in 1722–2015 identified using SPI1  
Key: A – moderate droughts, B – severe droughts, C – extreme droughts, D – all-category droughts

1 In line with expectations, moderate droughts evidently dominate, usually with a frequency  
2 of 2–8 per decade (Fig. 9A), then severe (Fig. 9b), and extreme (Fig. 9c) with typical frequencies  
3 not being much different, at 1–4 per decade and 1–3 per decade, respectively. In terms of these  
4 drought characteristics (Fig. 9), as with the characteristics described by SPI1, SPI3 and SPI24 (see  
5 Fig. 8), no long-term trends are observable in Poland for the last two or three centuries.

6 For comparison against the number of droughts delimited using documentary evidence, 50-  
7 year frequencies of the three categories of droughts were calculated for climatological seasons  
8 (Fig. 10). It comes as little surprise that the frequency of all-category droughts was greatest in  
9 winter. Other seasons show more-or-less similar frequencies. In winter, droughts evidently  
10 dominated in the study period in the second half of the 19<sup>th</sup> century, this is particularly well seen  
11 in the case of severe droughts, and slightly less so for moderate droughts, which were also quite  
12 frequent in the first half of the 20<sup>th</sup> century. Extreme droughts in winter do not show any significant  
13 changes over time, but it should be emphasised here that they were slightly more frequent in 1951–  
14 2000 than in 1851–1900. In spring, moderate droughts prevailed still in the period 1851–1950  
15 (usually 4–6 cases), with a greater frequency in the first 50-year period. Both severe and extreme  
16 droughts were most frequent (usually 1–3 cases) in 1851–1900, and in particular in 1951–2000  
17 (Fig. 10). In summer there is a clear change in the time pattern of drought occurrence: drought  
18 frequency rises in the 20<sup>th</sup> century (except severe droughts), and in the case of moderate droughts  
19 particularly in its second half. Frequency of extreme droughts is evidently higher in the 20<sup>th</sup> century  
20 compared to pre-1900 period. In autumn, moderate droughts do not show great changes in the last  
21 two centuries, while severe and extreme droughts were most frequent in the 20<sup>th</sup> century-(Fig. 10).

22

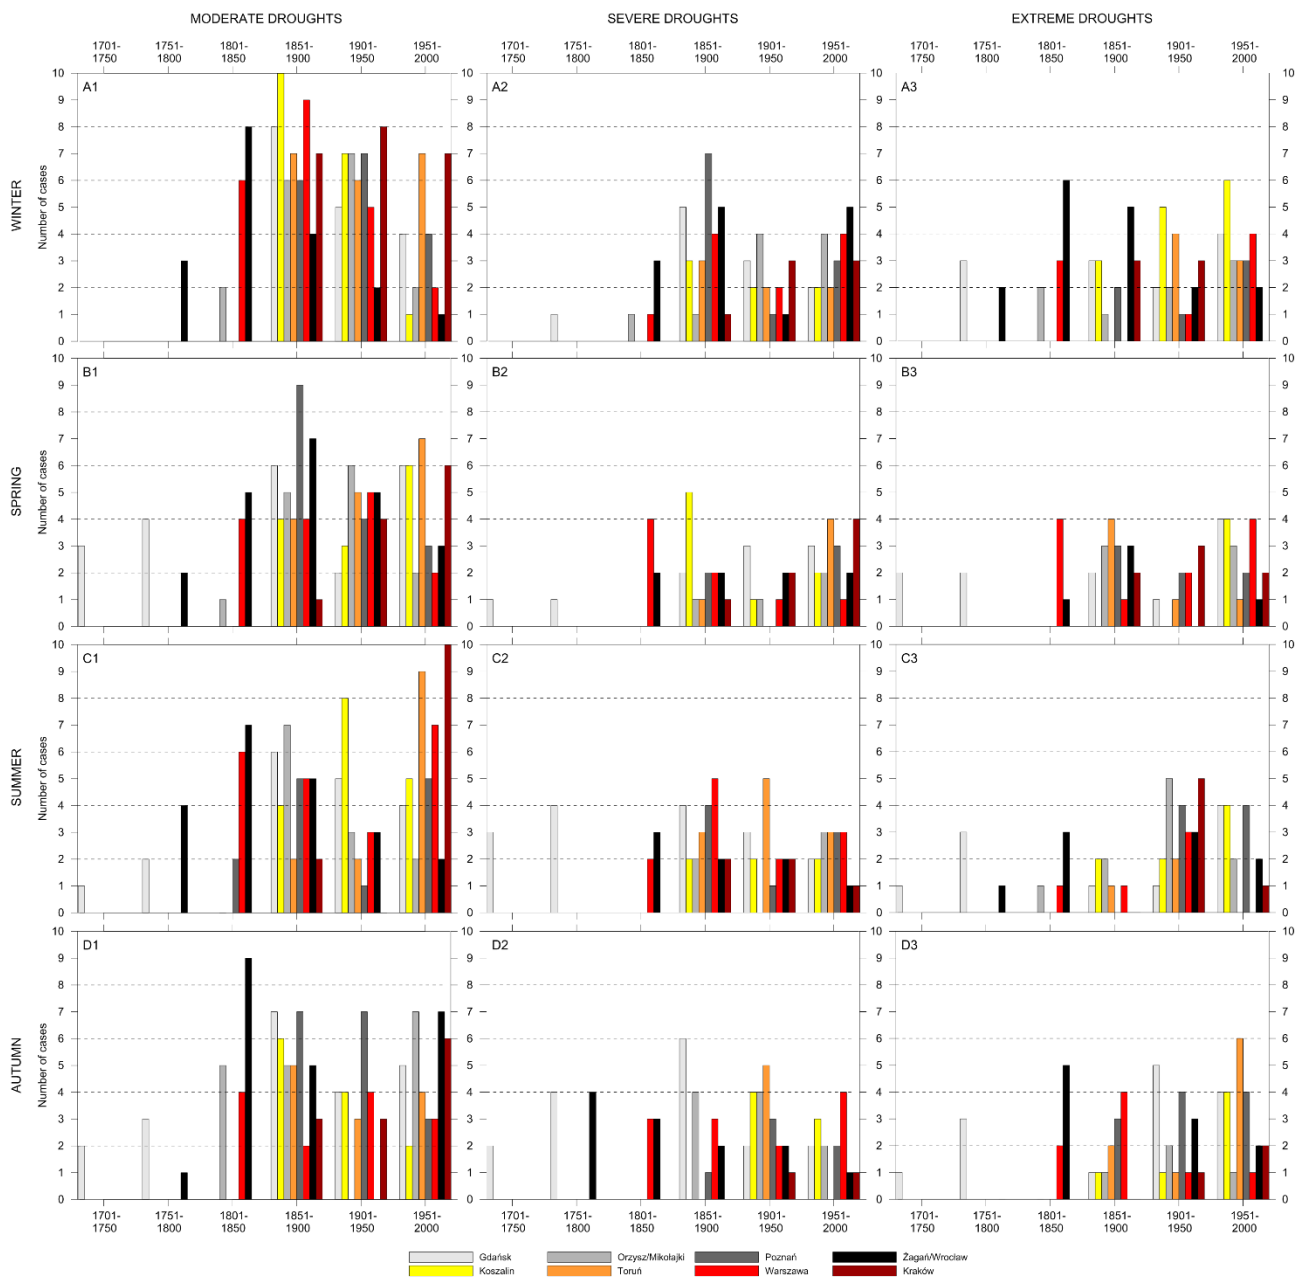

1  
2  
3  
4

Fig. 10. Seasonal 50-year frequency of droughts in Poland in 1722–2015 identified using SPI1

5 The frequencies of droughts per 100 years calculated for different their durations (2  
6 months, 3 months, etc.) are shown in Figure 11. The greatest number of all-category droughts  
7 occurred in Gdańsk (165) and in Żagań/Wrocław (155), while the smallest was in Kraków (104).  
8 In line with expectations, moderate droughts clearly dominate (55–75). The number of severe and  
9 extreme droughts is more-or-less comparable, most often ranging between 25 and 40. Both these  
10 two categories of droughts were most frequent in the coastal part of Poland, and least frequent in  
11 Lesser Poland (Fig. 11). Most droughts lasted two months (about 60–70%), and then 3–4 months  
12 (10–20%). The frequency of droughts of 5-or-more months was less than 10%. The longest  
13 droughts had durations of 7–8 months and occurred in Gdańsk from January to July of 1771, in  
14 Wrocław from March to September of 1805, in Poznań from May to November of 1874, in Toruń

1 from March to September of 1900, and in Wrocław (again) from August 1953 to March of 1954  
 2 (8 months).

3

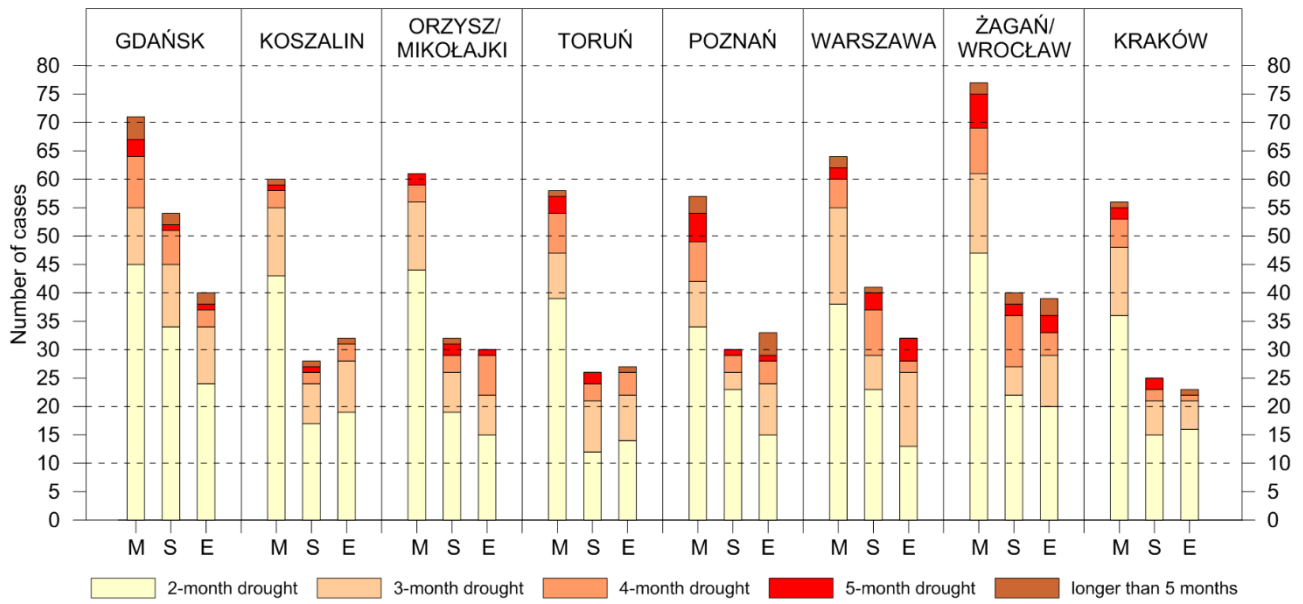

4

5 Fig. 11. Average frequency of three categories of droughts (M – moderate, S – severe, E –  
 6 extreme) in Poland per 100 years stratified by duration, 1722–2015

7

8 Łabędzki (2007) proposed a simple formula to calculate the frequency of occurrence of dry  
 9 months and droughts per 100 years based on SPI values (see methods). Using his formula we  
 10 calculated frequencies of dry months using SPI1, short-term droughts (SPI3) and long-term  
 11 droughts (SPI24), including three categories of them (see Fig. 12). Analysis of this figure shows  
 12 that the number of dry months in Poland usually ranges around 350 per 100 years (from 342 in  
 13 Orzysz/Mikołajki to 366 in Poznań). The number of short-term droughts (SPI3) for Poland as a  
 14 whole is comparable and usually ranges around 120 per 100 years (from 119 in Koszalin to 127 in  
 15 Wrocław and Kraków), while the frequency of long-term droughts (SPI24) is 15–16 per 100 years.  
 16 The short-term droughts distinguished here using SPI3 are most comparable to droughts delimited  
 17 using the method proposed in the paper. Ratios of frequencies between moderate, severe and  
 18 extreme droughts are generally similar in both methods (Figs 11 and 12), although in the Łabędzki  
 19 method there is a greater domination of moderate droughts over the other two categories. Severe  
 20 droughts are also clearly more numerous than extreme droughts (Fig. 12), which is not so clearly  
 21 visible in drought frequencies calculated using our method (Fig. 11).

22

23

24

25

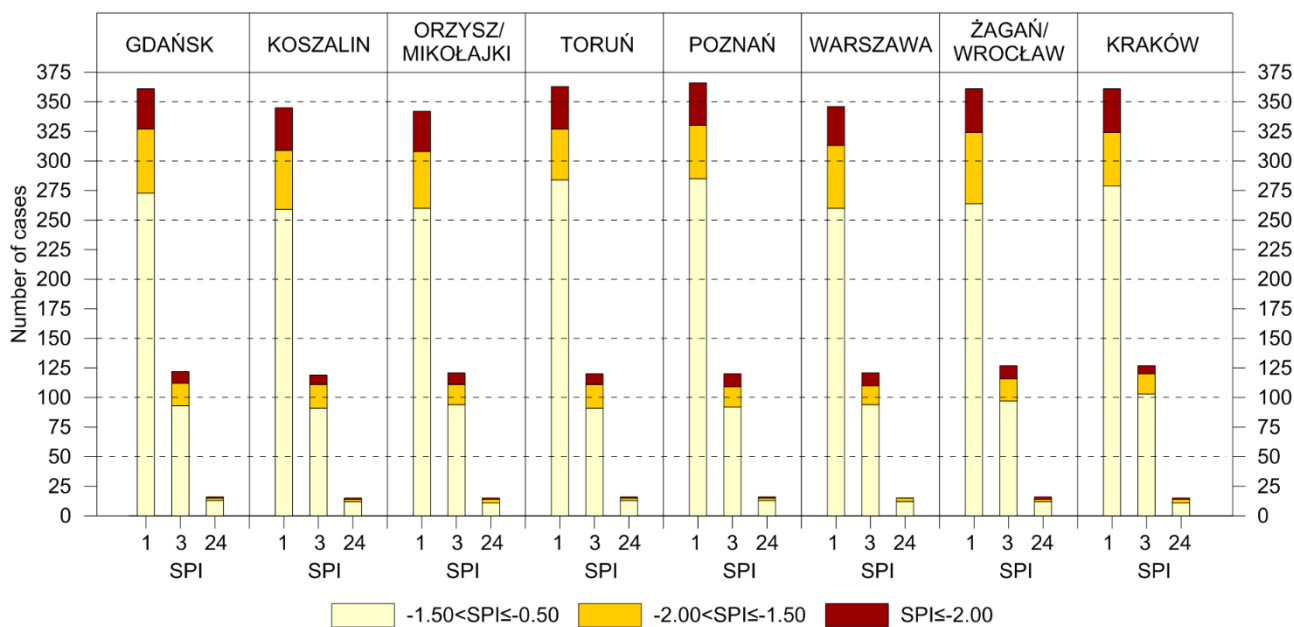

1

2 Fig. 12. Frequencies of dry months (SPI1), short-term droughts (SPI3) and long-term droughts  
 3 (SPI24) in Poland, including three intensity categories calculated using Łabędzki's formula

4

#### 5 4.4 Selected megadroughts in Poland from historical times

6 Based on detailed analysis of all documentary evidence gathered for the period 1451–1800 we  
 7 distinguished 17 megadroughts (also referred to in the paper as “extreme droughts”, index -3) in  
 8 Poland (see Fig. 5). Six of them – the most severe (Fig. 13) – have been chosen for more detailed  
 9 presentation here. The main features of each megadrought are described (e.g. time of occurrence,  
 10 duration, geographical area, consequences for nature, socio-economic impact).

##### 11 4.4.1 The year 1473

12 This drought affected the whole of Europe. In the case of Poland, it was quite well described by  
 13 Jan Długosz in “Annales”, as Długosz himself observed its course. He wrote about extraordinary  
 14 heat and a prolonged lack of rain. He emphasised the extremely low level of water in the Wisła  
 15 River and many other rivers that could be easily waded across. Water reservoirs were completely  
 16 dry. The lack of water was marked throughout the whole country. Fires were another commonplace  
 17 phenomenon. There were forest fires. Długosz also mentioned economic consequences. Fires  
 18 destroyed wild beehives in the forests. Drought destroyed the spring sowing. Animals got sick.  
 19 Fires affected such cities as Kraków, Wieliczka, Konin, Bełz, Chełm, Lubomia, Łęczyca,  
 20 Sandomierz and others (Długosz Ks.) (see Fig. 13). According to the Silesian chronicler Peter  
 21 Eschenloer, the drought lasted from 23 April to 11 November. This chronicler recorded an  
 22 extremely low level of water in the Odra River. Water mills could not operate. There was no water  
 23 in wells. Even wild animals were affected by the lack of water. Similar information was provided  
 24 by another Silesian chronicler, Nicolaus Pol. Meanwhile, the author of *Roczniki głogowskie*,

1 Kaspar Borgeni, reported that the drought lasted only 10 weeks. However, he provided many  
 2 detailed dates in his narrative about the harvest time and their quality; there was no rain from April  
 3 4 to September 22, so it should be considered that the drought lasted almost 6 months.

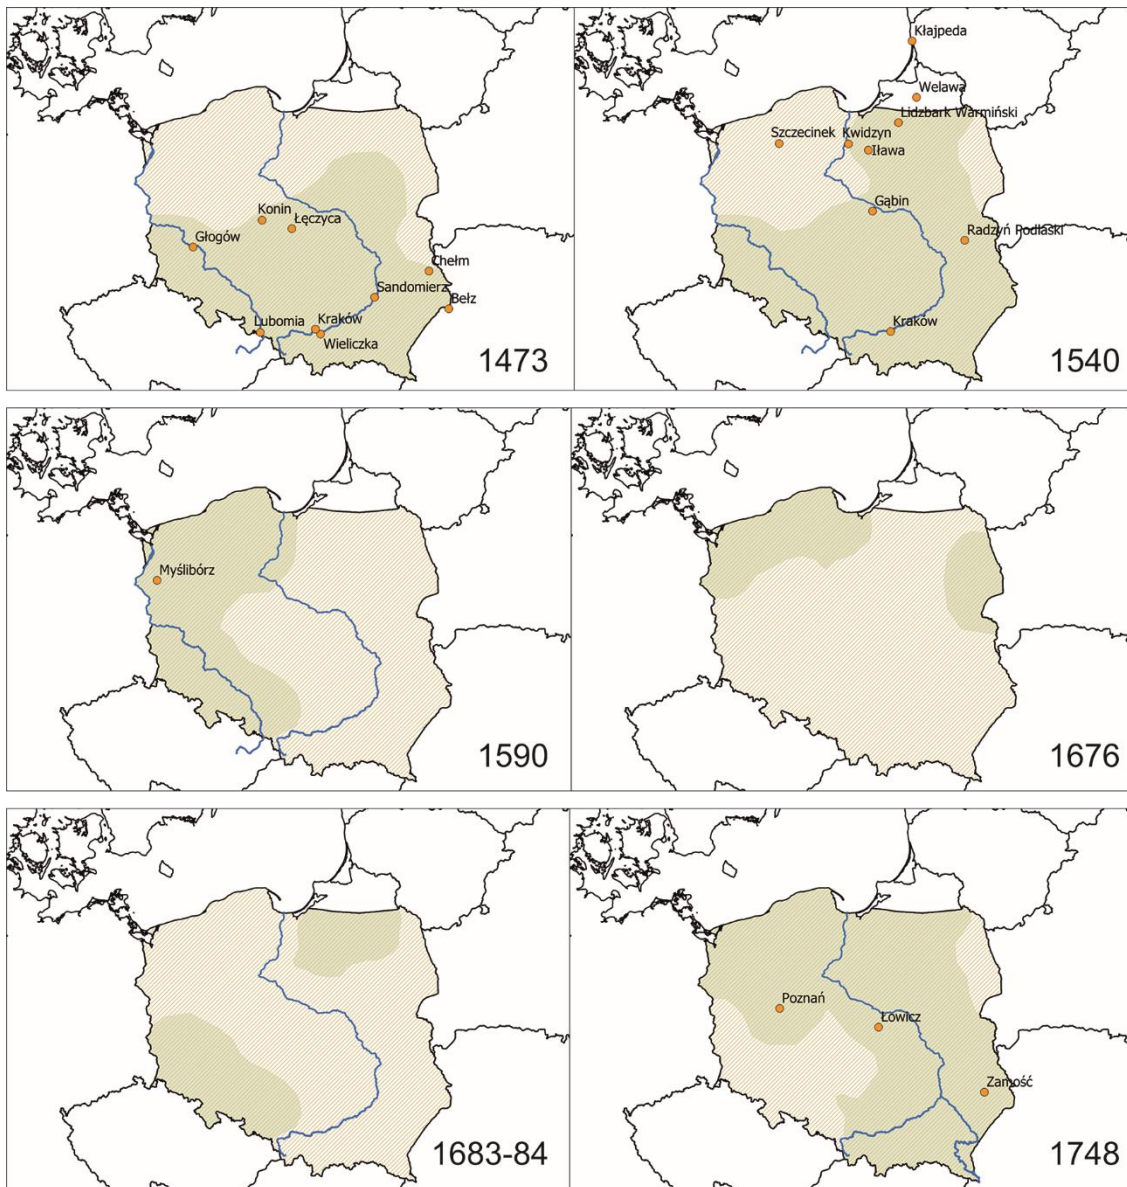

4  
 5 Fig. 13. The most severe megadroughts, with spatial coverage (dark colour). Location of  
 6 sites and rivers mentioned in Section 4.4 and Table 3.

7 4.4.2 The year 1540

8 This drought belongs to one of the best described droughts in old Europe. In Poland, however, the  
 9 year 1540 began with numerous floods in the winter (Poznań) and early spring (Żuławy and  
 10 Gdańsk). Heavy rainfalls also caused floods in Świecie located on the Wisła River in its lower  
 11 part. Polish sources are quite laconic, if unambiguous, about the drought of 1540, considering its  
 12 scale. A parish priest from Lidzbark Warmiński wrote about a terrifying drought. The Silesian  
 13 chronicler Nicolaus Pol wrote about the drying of many waters and the greening of the Odra River,  
 14 probably as a result of the development of algae at high temperatures. It was reported that grass

1 was drying out, cereal harvests were poor, cattle had to go many miles to watering places. The  
2 detailed observations of the Kraków professor Marcin Biem leave no doubt as to the lack of rainfall  
3 and the extreme nature of the drought in the vicinity of Kraków. The drought lasted until October.  
4 There were many fires, including in such cities as Kwidzyn, Welawa, Klaipeda in the Prussian  
5 state, Gąbin in Mazowsze, and Radzyń Podlaski (see Fig. 13). Fires were also reported in Iława  
6 and Szczecinek (Nowosad and Oliński, 2019).

#### 7 4.4.3 The year 1590

8 The winter of 1589/90 was quite harsh, and rivers froze. There must certainly have been spring  
9 thaws. In the literature, mention is made of there having been no rain for 38 weeks. In the vicinity  
10 of Myślibórz on 4<sup>th</sup> May there was a severe frost, followed by a strong heat. There were also heavy  
11 storms. The phenomena resulted in numerous fires. From the end of May there was an  
12 uninterrupted rainless heat that lasted for a very long time. The duration of the heat was determined  
13 to have lasted 38 weeks, which is probably a mistake. Rivers dried up, the river mills stopped  
14 working. Prices rose significantly (Reinhold, 1846, p. 143; Girguś et al., 1965, p. 182). The dry  
15 summer and the drying of many rivers were also mentioned in reference to Silesia and the  
16 Karkonosze Mountains (Bergemann, 1830a, b). The level of the Wisła River was also extremely  
17 low. The drought therefore affected all Polish areas and lasted continuously from the end of May  
18 to the end of autumn. Many of its manifestations (total lack of rainfall, drying of rivers, high  
19 temperatures, consequences for agriculture and nature) indicate its extreme character.

#### 20 4.4.4 The year 1676

21 The drought of 1676 was described independently in several sources. Spring is supposed to have  
22 abounded in storms that caused numerous fires. There was drought in the summer. In Pomerania  
23 (see Fig. 13) it rained only twice in the summer. The whole summer was dry and hot. The drought  
24 caused damage to crops in slightly higher areas. The harvest of fruits and vegetables was also poor  
25 due to the drought. In Podlasie, the beginning of January was exceptionally warm, although frosts  
26 arrived later. According to the records from Antoni Chrapowicki's diary, June and July were very  
27 dry months in Podlasie. Chrapowicki wrote that crops “burned out” in the fields. In August and  
28 September, Chrapowicki stayed in eastern Belarus, which is why his records concerning the late  
29 summer and autumn cannot be taken into account (*Diaryusz Życia JWJmci Pana Jan Antoni*  
30 *Chrapowicki*). The research into the memoirs of Chrapowicki indicates that the precipitation in  
31 1676 was the slightest of all the years covered by his diary (1656–1684) (Przybylak and Marciniak,  
32 2010). In other sources, the high prices that prevailed in the country this year were also underlined  
33 (Namaczyńska, 1937).

#### 34 4.4.5 The years 1683–1684

1 It is known from later record that a great drought was recorded in Masuria in 1683. It caused a  
2 lack of crops and high prices. In Poland in 1684, after a harsh winter, a hot, dry summer came. The  
3 drought resulted in earlier, but thus weaker, harvests of winter grain and the destruction of spring  
4 crops. Water reservoirs dried up. There were not enough watering places for animals  
5 (Namaczyńska, 1937). According to Silesian sources, the drought came on 24<sup>th</sup> June 1684; it  
6 destroyed grain and flax, and burned grass. Cattle died, for a lack of grass and water. Prices were  
7 very high (Gomolcke, 32–33, 54). From various sources it can be established that the drought  
8 began at the end of June and continued until September 1684.

#### 9 4.4.6 The year 1748

10 The winter was quite long. In Gdańsk, on 7<sup>th</sup> April, there was ice-floe on the Motława River. In  
11 the vicinity of Toruń the ice on the Wisła River did not start to melt until the beginning of April.  
12 Near Toruń, the Wisła river flooded adjacent territories. The water level began to fall at the  
13 beginning of May. Beautiful, dry weather came, and it started to arouse farmers' anxiety about the  
14 growth of plants. On 25<sup>th</sup> May, it rained in Toruń, but the intensity of precipitation was  
15 insignificant. The second half of May was considered to be extremely dry. In Gdańsk, heat and  
16 drought prevailed from 8<sup>th</sup> to 23<sup>th</sup> May. In Toruń, on 7<sup>th</sup> June an increase was recorded in the water  
17 level in the Wisła River, which may indicate more significant rainfalls in the south of Poland. In  
18 the vicinity of Toruń, rain fell after a long break, on 11<sup>th</sup> June, causing people to rejoice, but by  
19 22<sup>th</sup> June dry weather was again recorded. In Gdańsk, in June, dry days prevailed, but they were  
20 interspersed with rainy days.

21 On 1<sup>st</sup> July, in Toruń, it was recorded that there had been light rains from time to time, but  
22 above all, a great drought had been felt. No fires had broken out in the vicinity yet, but they had  
23 in many places in Poland and Lithuania: fires were recorded in Poznań and Zamość (see Fig. 13).  
24 In Gdańsk, rainless weather prevailed throughout the first half of July, while in the second half  
25 there were only five days with rain. In mid-July, high prices resulting from the prolonged drought  
26 were reported. Transport on the Wisła River was extremely difficult due to the low water level.  
27 Information about the drought also came from other European countries. In addition, locusts  
28 appeared in Hungary and Transylvania. In Toruń and Gdańsk, rain fell for a few days after the  
29 solar eclipse of 25<sup>th</sup> July. Similar rains fell at that time in Warszawa. At the beginning of August,  
30 however, the drought was reported again. In Toruń, rain fell on 5<sup>th</sup> August, then on 8<sup>th</sup> August.  
31 At that time, the water level in the Wisła River also increased for a short time, but at the same  
32 time, there were reports of fires having destroyed Łowicz. In Toruń, the drought prevailed until  
33 the end of August and the first half of September. In Gdańsk, the whole month of August was  
34 very dry. Rain fell there in early September, but in the following days the drought returned and  
35 did not stop until mid-September. The autumn was very cold. The end of the drought was not



1 seen in Toruń until mid-October, but complaints about the very low water level in the San River  
2 were still being reported (Reyger, Brauer).

## 4 **5 Discussion**

5 Every climate proxy has its own advantages, but also its weaknesses. Therefore, to increase the  
6 probability of correctly dating drought in Poland, we decided to use both documentary evidence  
7 and dendrochronological data for the period before the 19<sup>th</sup> century. A satisfactory number of data  
8 obtained from both kinds of proxies is available for period 1451–1800, allowing for reliable cross-  
9 checking of information about the occurrence and characteristics of droughts. For the most recent  
10 period (1801–2015), the usefulness of tree-ring data in describing dry spells (droughts) was  
11 checked by comparing it against droughts delimited for the area of Poland using SPI calculated for  
12 eight long-term series of monthly precipitation totals.

13 Tree rings in Poland can be a source of information about both hydroclimate phenomena,  
14 such as droughts, and air temperature (Büntgen et al., 2007, 2011; Koprowski et al., 2012; Opała  
15 and Mendecki, 2014; Opała, 2015; Pritzkow et al., 2016; Balanzategui et al., 2017). The key issue  
16 is to isolate which factor strongly influences tree-ring growth. Up till now, tree-ring widths in  
17 Poland have been used only for air temperature reconstructions (e.g. Przybylak et al., 2005;  
18 Szychowska-Krapiec, 2010; Niedźwiedz et al., 2015). In the present paper, this kind of proxy data  
19 is used for the first time to identify drought occurrence in the vegetation period. It was assumed  
20 that the combined information from historical and instrumental sources on the one hand, and  
21 dendrochronological sources on the other, would be crucial in identifying the strength of water  
22 shortage and the occurrence of droughts in Poland in recent centuries.

23 Extreme and severe drought occurrence in spring and summer, as identified by  
24 documentary data, corresponds closely with the occurrence of negative pointer years (droughts).  
25 In the period 1451–1800, 48 severe and extreme droughts in the mentioned seasons have been  
26 determined to have occurred across all of Poland or in at least two geographical regions (see Fig.  
27 1). Dendrochronological data showed significantly smaller rings having formed during 52.1% of  
28 these. Dobrovolný et al. (2015) found very similar results for the Czech Republic based on a set  
29 of 3,194 oak-ring-width samples for the last 1,250 years (761–2010). Negative tree-ring-width  
30 extremes were confirmed in documentary sources in 53% of cases. Analysis of extreme and severe  
31 droughts that occurred in only one geographical region in Poland reveals a better correspondence  
32 between analysed proxies than those described earlier for the greater area of Poland (at least two  
33 regions). In this case negative pointer years in tree rings were noted in as many as 59.1% of  
34 detected droughts by historical sources.

35 Even better agreement between both kinds of proxy data was found when megadroughts  
36 identified by documentary evidence were taken into account. In four (1473, 1540, 1590 and 1748)

1 of the six described here (see Section 4), clear signals in dendrochronological data were detected  
2 (negative pointer years). Using documentary sources, two megadroughts (1540 and 1590) were  
3 also qualified as very outstanding droughts in the Czech Republic (Brázdil et al., 2013). Of those,  
4 however, only the year 1590 had a negative tree-ring width index (TRW) (of -1.818), although this  
5 value was not very high (see Table S1 in Supplement in Dobrovolný et al., 2015). Brázdil et al.  
6 (2013) using documentary evidence also distinguished three other outstanding droughts in the  
7 Czech Lands (1616, 1718 and 1719). All of those also occurred in Poland, but their category using  
8 documentary evidence was estimated by us as -2 (severe). In all those years except 1718, negative  
9 pointer years were also found in one Polish region (see Fig. 6), while in the Czech Republic an  
10 extreme negative TRW index (-2.474) was found only for the year 1616 (see Table S1 in  
11 Supplement in Dobrovolný et al., 2015). Based on the published list of TRW indices for Czech  
12 Republic (oak chronology) by Dobrovolný et al. (2015) we found 33 extreme negative TRW  
13 indices in the period 1451–1800, which suggests favourable conditions for drought occurrence.  
14 We excluded the two last years (1790 and 1800), which were identified for Scots pine tree rings  
15 from Upper Silesia (Opała and Mendecki, 2014). For almost half of this set of years (48.5%), we  
16 confirmed the existence of strong negative pointer years also in Poland’s tree dendrochronologies.  
17 Significantly better agreement (89%), between the occurrence of narrow rings in the Czech  
18 Republic on the one side, and Upper Silesia (Opała and Mendecki, 2014) and southern Poland  
19 (Opała, 2015) on the other, was found by Dobrovolný et al. (2015) for the overlapping period  
20 1770–1932. These quite good correspondence patterns between negative TRW in the Czech  
21 Republic and Poland (in particular its southern part), which are also very clear in analysis of  
22 drought occurrence and areal coverage (which are presented in the Old World Drought Atlas  
23 [OWDA, Cook et al., 2015]), are the result of large positive sea-level-pressure anomalies over the  
24 whole of central Europe (including Poland) in MAM and JJA during the occurrence of negative  
25 extremes in TRW (see Fig. 5 in Dobrovolný et al., 2015). Significantly weaker agreement (about  
26 30%) was found between the timings of droughts in Poland delimited using documentary evidence  
27 and droughts reconstructed for the whole of Europe using tree rings (Cook et al., 2015). This is  
28 caused by the fact that Cook et al. (2015) used significantly fewer dendrochronologies from Poland  
29 (only four – and those mainly from northern Poland, see their Supplementary Materials) than we  
30 used in the present paper (22, see Table 1 for details).

31 The megadrought year of 1473 was detected in the Baltic Province on the basis of an oak  
32 chronology from Eastern Pomerania (Ważny, 1990). Narrow rings were observed in 80 percent of  
33 the samples for this year. The effect of the drought in 1473 can also be shifted and observed in  
34 southern Poland in 1474 (Szychowska-Krapiec, 2010). The drought in 1540 was observed in  
35 different parts of Europe; particularly strong evidence is available in documentary sources (Wetter  
36 et al., 2014; Pfister et al., 2015; Brázdil et al., 2016). Additionally, many dendrochronological data

1 confirm the existence of strong droughts in much of Europe, in particular from France to Latvia,  
2 Belarus and Ukraine and from the southern Scandinavian Peninsula to northern parts of Italy  
3 (OWDA, Cook et al., 2015). Čufar et al. (2008) identified the existence of droughts in Slovenia in  
4 1540 based on tree rings. The scale and intensity of the 1540 megadrought in Europe described by  
5 Wetter et al. (2014) as “an unprecedented 11-month-long Megadrought” (more severe than the  
6 2003 drought in Western Europe and the 2010 drought in Russia) was, however, recently  
7 questioned by Büntgen et al. (2015), who analysed this year in light of 24,303 individual tree-ring-  
8 width measurement series. It is also worth adding here that in different parts of Europe the effect  
9 in tree rings was shifted and observed in 1541 (Büntgen et al., 2011). Analysis of our 22  
10 dendrochronologies reveals the occurrence of narrow rings in trees growing in the Baltic Province  
11 and in the Lesser Poland Province, and thus not in the whole of Poland as shown in the OWDA  
12 (Cook et al., 2015). In 1590, narrow rings were observed in the Baltic Province, but the decidedly  
13 strongest droughts in Europe in view of this proxy were those occurring in France and Germany  
14 (Cook et al., 2015). Narrow rings were also noted in most sites in central and eastern Europe, as  
15 well as in Scandinavia. The year 1748 seems to have a somewhat regional character; narrow rings  
16 were noted in the Greater Poland and Pomerania Province and in the Lesser Poland Province.  
17 There is no information about tree reaction for this drought in selected sites in central Europe  
18 (Büntgen et al., 2011). Looking at OWDA we see the occurrence of droughts in this year mainly  
19 in northern and western parts of Poland (although their severity is not so large). Evidently more  
20 severe droughts in this year in Europe were particularly observed in southern Germany, the whole  
21 of Austria and the western borders of the Czech Republic (Cook et al., 2015).

22 Both documentary evidence and dendrochronological data clearly indicate that in the  
23 period 1451–1800 the greatest frequency of droughts in Poland occurred in the 18<sup>th</sup> century, and  
24 particularly the second half (32 cases). Similar results are also seen in the Czech Republic (see  
25 Fig. 4a in Brázdil et al., 2013). The smallest number of droughts was noted in the 16<sup>th</sup> century  
26 (about 35), and was different than in the Czech Lands, where the evidently smallest number  
27 occurred in the 17<sup>th</sup> century. In the study period, the total number of all-category droughts in  
28 Poland identified reached 148 and 156 – using documentary evidence and dendrochronological  
29 data, respectively. This means that both proxies reconstruct quite a similar frequency of drought  
30 occurrence in time scales from centuries to decades. The overall numbers of droughts identified  
31 using documentary evidence in Poland (present study) and the Czech Lands (Fig. 4a in Brázdil et  
32 al., 2013) in the overlapping period 1501–1800 were very similar and reached 132 and 126 cases,  
33 respectively.

34 All the dendrochronologies and long-term series of precipitation that we gathered and used  
35 for SPI calculation are available only for the common period 1876–1985. Therefore, for this  
36 period, statistics were calculated to compare the timings of dry periods (droughts) in Poland

1 identified using both of these kinds of data. The agreement between droughts occurring at least in  
2 two geographical (SPII<sub>May-Jul</sub> delimited droughts) and two natural-forest regions (significant  
3 negative pointer years) was 25.5%. On the other hand, for a less strict criterion, i.e. the occurrence  
4 of droughts at least in one region, the agreement reached 50.9%. Thus, the latter number is close  
5 to the value of agreement of drought timings identified using documentary evidence and the  
6 occurrence of negative pointer years (59.1%).

7 Having those series for the abovementioned period, we also conducted a correlation  
8 analysis to investigate how spatially coherent the association is between climate (SPII<sub>May-Jul</sub>) and  
9 tree-ring widths in the area of Poland. Coefficients of Pearson's linear correlation were calculated  
10 for 1–2 dendrochronologies representing each natural-forest region, with SPII<sub>May-Jul</sub> values  
11 calculated for long-term series of precipitation taken from meteorological stations in the same  
12 region and closest to the area covered by the dendrochronologies. The closest relationships  
13 between climate and tree-ring growth were obtained for the Greater Poland and Pomerania  
14 Province and the Silesia Province, where the correlation coefficient  $r$  reached: 0.40 (site 9, Poznań  
15 in Table 1), 0.44 (site 11, Kuyavia-Pomerania) and 0.46 (site 17, Wrocław). Such good correlation  
16 ( $r=0.43$ ) was also found by Dobrovolný et al. (2015) for the Czech Republic between 18 variants  
17 of Czech oak chronology and March–June precipitation totals. In three other Polish provinces  
18 (Baltic Coast, Masuria and Masovia, see Fig. 1) correlation coefficients are still statistically  
19 significant, but are clearly smaller: 0.25 (site 3, Wolin in Table 1), 0.14 (site 1, Koszalin), 0.24  
20 (site 7, Suwałki), 0.13 (site 8, Hajnówka) and 0.21 (site 15, Warszawa). A similar correlation value  
21 (about 0.20) between tree-ring width and precipitation in June and July was found by Helama et  
22 al. (2014) for south-western Finland. On the other hand, a significantly better correlation (about  
23 0.4) was calculated by Seftigen et al. (2013) for south-eastern Sweden. The increased strength of  
24 correlation here was probably due to the selection of trees growing at xeric sites, where the radial  
25 growth was most likely limited by moisture availability. The climate–tree-ring-growth relationship  
26 in Lesser Poland Province was not stated – the coefficient of correlation was equal to 0.0. The  
27 reasons for this different climate–tree-growth behaviour in this part of Poland in comparison to  
28 other studied regions are unknown.

29 From the perspective of available historical sources from the period 1451–1800, an  
30 increasing number of droughts was reported from the second half of the 16<sup>th</sup> century onwards,  
31 excluding the first half of the 17<sup>th</sup> century. The decrease in their occurrence in this period can be  
32 explained by large source deficiencies. They resulted from the destruction of many documents  
33 during the Swedish invasion on Polish territories in 1655-1660. The number of droughts in the  
34 first half of the 17<sup>th</sup> century is likely to have been higher. As information about moderate droughts  
35 is quite accidental, the sources certifying extreme and severe droughts seem more reliable and  
36 complete. According to our research, droughts occurred most frequently in the second half of the

1 18<sup>th</sup> century. This rectifies the previously accepted data on drought in Poland available in some  
2 geographic works (see e.g. Słota et al., 1992; Kaca et al., 1993; Łabędzki, 2006), which include  
3 information that in the 14<sup>th</sup> century there were 20 droughts in Poland, 25 in the 15<sup>th</sup> century, 19 in  
4 the 16<sup>th</sup> century, 24 in the 17<sup>th</sup> century, and 22 in the 18<sup>th</sup> century. However, these numbers refer  
5 to the frequency of hot summer seasons distinguished by Sadowski (1991, Sadowski also assumed  
6 the year 1300, 1400, etc. to be the first year of a century). On the basis of the research presented  
7 in this paper, we conclude that severe and extreme droughts (indexes -2, -3, respectively) were in  
8 fact slightly less frequent, while their occurrence in the period from the 15<sup>th</sup> to the 18<sup>th</sup> century, as  
9 previously stated, was slightly increasing.

10

## 11 **Summary and concluding remarks**

12 The main results of the present paper can be summarised as follows:

- 13 1. More than one hundred droughts were found in documentary sources from the mid-15<sup>th</sup>  
14 century to the end of the 18<sup>th</sup> century, including 17 megadroughts. A greater-than-average  
15 number of droughts was observed in the second halves of the 17<sup>th</sup> and, particularly, the 18<sup>th</sup>  
16 century. Dendrochronological data confirmed this general tendency in the mentioned  
17 period. The clearly greatest number of negative pointer years occurred in the 18<sup>th</sup> century  
18 and then in the period 1451–1500.
- 19 2. Droughts in the period 1451–1800 occurred most frequently in the Baltic Coast–Pomerania  
20 and Silesia regions, while in the rest of the analysed regions their frequency was more-or-  
21 less similar. Generally similar results have been found for the period 1722–2015 based on  
22 instrumental data.
- 23 3. Analysis of SPI (including its lowest values – droughts) showed that the long-term  
24 frequency of droughts in Poland has been stable in the last two or three centuries.
- 25 4. Most droughts in the period 1722–2015 lasted for two months (about 60–70%), and the  
26 next most common duration was 3–4 months (10–20%). Frequencies of droughts of 5 or  
27 more months were below 10%. The longest droughts lasted for 7–8 months.
- 28 5. The frequency of all-category droughts in Poland in the period 1722–2015 was greatest in  
29 winter. This fact should be taken into account when droughts delimited using documentary  
30 evidence are analysed. In light of this information, droughts in spring and summer clearly  
31 dominated in Poland in the period 1451–1800, while in winter only three cases were  
32 mentioned.
- 33 6. Analysis of the occurrence of negative pointer years (a good proxy for droughts) showed a  
34 good correspondence with droughts delimited based on documentary and instrumental data  
35 in the periods 1451–1800 and 1722–2015, respectively.

1 Our study supports the usefulness of both kinds of proxy data as reliable tools for delimiting  
2 and characterising droughts for the pre-instrumental period in Poland. Information about droughts  
3 received from historical and dendrochronological data very often complete each other. In some  
4 cases where it is difficult to reliably categorise droughts based on historical sources, the occurrence  
5 of narrow rings in trees from different regions and their magnitude can significantly help in final  
6 and more reliable categorisation of this phenomenon. Such a possibility appears to be very  
7 important due to the fact that the historical data are based on subjective observations. On the other  
8 hand, the information received from old historical documents can be also useful for indicating  
9 reasons for the occurrence of the narrow rings noted in trees (droughts, insects, etc.). As long as  
10 historical buildings in Poland continue not to be extensively investigated for wood dating, and not  
11 all historical documents are analysed for the study of old weather conditions, the knowledge about  
12 droughts will be incomplete, and further work is thus needed.

13  
14 **Competing interests.** The authors declare that they have no conflict of interest.

15  
16 **Acknowledgements.** The research work of P. Oliński and R. Przybylak was supported by a grant  
17 entitled ‘*Climatic conditions in South Baltic Areas in the second half of the 15th and 16th centuries*  
18 *and their consequences for social, economic and cultural life*’, funded by the National Science  
19 Centre, Poland (Grant No. DEC-2013/11/b/HS3/01458). R. Puchałka was supported by a grant  
20 entitled ‘*Xylogenesis and tree-ring chronologies in European beech (*Fagus sylvatica*) and*  
21 *Sessile oak (*Quercus petraea*) in the north-eastern margin of their natural range*’, funded by the  
22 National Science Centre, Poland (Grant No. 2017/01/X/NZ8/00257). We also thank anonymous  
23 reviewers for their constructive and helpful suggestions and comments, which significantly help  
24 to improve the article.

25

## 26 **References**

27 Alexander, L. V., Zhang, X., Peterson, T. C., Caesar, J., Gleason, B., Klein Tank, A. M. G., Haylock, M., Collins,  
28 D., Trewin, B., Rahimzadeh, F., Tagipour, A., Rupa Kumar, K., Revadekar, J., Griffiths, G., Vincent, L.,  
29 Stephenson, D. B., Burn, J., Aguilar, E., Brunet, M., Taylor, M., New, M., Zhai, P., Rusticucci, M., Vazquez-  
30 Aguirre, J. L.: Global observed changes in daily climate extremes of temperature and precipitation. *Journal of*  
31 *Geophysical Research*, vol. 111, D05109, doi:10.1029/2005JD006290, 2006.

32 Allen, C. D., Macalady, A. K., Chenchouni, H., Bachelet, D., Mcdowell, N., Vennetier, M., Kitzberger, T., Rigling,  
33 A., Breshears, D. D., Hogg, E. H. T., Gonzalez, P., Fensham, R., Zhang, Z., Castro, J., Demidova, N., Lim, J., Allard,  
34 G., Running, S. W., Semerci, A. and Cobb, N.: A global overview of drought and heat-induced tree mortality reveals  
35 emerging climate change risks for forests, 259, 660–684, doi:10.1016/j.foreco.2009.09.001, 2010.

36 Bąk, B., Kejna, M., Uscka-Kowalkowska, J.: Susze meteorologiczne w rejonie Stacji ZMŚP w Koniczynie (Pojezierze  
37 Chełmińskie) w latach 1951–2010 (Meteorological droughts in the area of the ZMŚP Station in Koniczynka  
38 (Chełmińskie Lake District) in the years 1951-2010), *Woda-Środowisko-Obszary Wiejskie*, 12, 19-28, 2012.

39 Bąk, B. and Kubiak-Wójcicka, K.: Impact of meteorological drought on hydrological drought in Toruń (central  
40 Poland) in the period of 1971–2015. *Journal of Water and Land Development*, 32, 3–12, DOI:10.1515/jwld-2017-  
41 0001, 2017.

- 1 Bąk, B. and Łabędzki, L.: Assessing drought severity with the relative precipitation index (RPI) and the standardized  
2 precipitation index (SPI). *Journal of Water and Land Development*, 6, 89–105, 2002.
- 3 Balanzategui, D., Knorr, A., Heussner, K.-U., Wazny, T., Beck, W., Słowiński, M., Helle, G., Buras, A., Wilmking,  
4 M., Van Der Maaten, E., Scharnweber, T., Dorado-Liñán, I. and Heinrich, I.: An 810-year history of cold season  
5 temperature variability for northern Poland, *Boreas*, 47(2), 443–453, doi:10.1111/bor.12274, 2017.
- 6 Bartczak, A., Glazik, R., Tyszkowski, S.: Identyfikacja i ocena intensywności okresów suchych we wschodniej części  
7 Kujaw (Identification and evaluation of the intensity of dry periods in the eastern part of Kujawy), *Nauka Przyr.  
8 Technol.* 8, 4, #46, 1-22, 2014.
- 9 Bartholy, J. and Pongracz, R.: Regional analysis of extreme temperature and precipitation indices for the Carpathian  
10 Basin from 1946 to 2001, *Global Planet. Change*, 57, 83–95, 2007.
- 11 Bergemann, J.G.: Beschreibung und Geschichte von Warmbrunn und seinen Heilquellen, J.S. Landolt, Hirschberg,  
12 1830a.
- 13 Bergemann, J.G.: Chronik der Stadt Buznlau, Abt. 3, Bunzlau, 1830b.
- 14 Brázdil, R., Trnka, M., Dobrovolný P., Chromá, K., Hlavinka, P., and Žalud, Z.: Variability of droughts in the Czech  
15 Republic, 1881–2006, *Theor. Appl. Climatol.*, 97, 297–315, doi:10.1007/s00704-008-0065-x, 2009.
- 16 Brázdil, R., Trnka, M., Dobrovolný, P., Chromá, K., Hlavinka, P. and Žalud, Z.: Variability of droughts in the Czech  
17 Republic, 1881–2006. *Theoretical and Applied Climatology*, 97(3), 297-315, [https://doi.org/10.1007/s00704-008-](https://doi.org/10.1007/s00704-008-0065-x)  
18 [0065-x](https://doi.org/10.1007/s00704-008-0065-x), 2007.
- 19 Brázdil, R., Dobrovolný, P., Trnka, M., Büntgen, U., Řezníčková, L., Kotyza, O., Valášek, H., and Štěpánek, P.:  
20 Documentary and instrumental-based drought indices for the Czech Lands back to AD 1501, *Clim. Res.*, 70: 103–  
21 117, doi: 10.3354/cr01380, 2016.
- 22 Brázdil, R., Dobrovolný, P., Trnka, M., Kotyza, O., Řezníčková, L., Valášek, H., Zahradníček, P., and Štěpánek, P.:  
23 Droughts in the Czech Lands, 1090–2012 AD, *Clim. Past*, 9, 1985-2002, <https://doi.org/10.5194/cp-9-1985-2013>,  
24 2013.
- 25 Brázdil, R., Kiss, A., Luterbacher, J., Nash, D.J., Řezníčková, L.: Documentary data and the study of past droughts: a  
26 global state of the art, *Clim. Past.*, 14, 1915-1960, 2018
- 27 Brewer, S., Alleaume, S., Guiot, J., and Nicault, A.: Historical droughts in Mediterranean regions during the last 500  
28 years: a data/model approach, *Clim. Past*, 3, 355–366, [www.clim-past.net/3/355/2007/](http://www.clim-past.net/3/355/2007/), 2007
- 29 Bryś, K. and Bryś, T.: Reconstruction of the 217-year (1791–2007) Wrocław air temperature and precipitation series.  
30 *Bull. of Geogr. Phys. Geography Series*, 3, 121–171, 2010.
- 31 Bunn, A. G.: A dendrochronology program library in R (dplR), *Dendrochronologia*, 26(2), 115–124,  
32 doi:10.1016/j.dendro.2008.01.002, 2008.
- 33 Büntgen, U., Brázdil, R., Heussner, K.-U., Hofmann, J., Kontic, R., Kyncl, T. S., Pfister, C., Chromá, K. R. and Tegel,  
34 W.: Combined dendro-documentary evidence of Central European hydroclimatic springtime extremes over the last  
35 millennium, , doi:10.1016/j.quascirev.2011.10.010, 2011.
- 36 Büntgen, U., Frank, D. C., Kaczka, R. J., Verstege, A., Zwijacz-Kozica, T. and Esper, J.: Growth responses to climate  
37 in a multi-species tree-ring network in the Western Carpathian Tatra Mountains, Poland and Slovakia., *Tree Physiol.*,  
38 27(5), 689–702 [online] Available from: <http://www.ncbi.nlm.nih.gov/pubmed/17267360>, 2007.
- 39 Büntgen, U., Tegel, W., Carrer, M., Krusic, P.J., Hayes, M. and Esper, J.: Commentary to Wetter et al. (2014): Limited  
40 tree-ring evidence for a 1540 European ‘Megadrought’, *Clim. Change*, 131, 183–190, [https://doi.org/10.1007/s10584-](https://doi.org/10.1007/s10584-015-1423-1)  
41 [015-1423-1](https://doi.org/10.1007/s10584-015-1423-1), 2015.
- 42 Cook, E. R., Seager, R., Kushnir, Y., Briffa, K. R., Büntgen, U., Frank, D., Krusic, P. J., Tegel, W., van der Schrier,  
43 G., Andreu-Heyles, L., Bailie, M., Baittinger, C., Bleicher, N., Bonde, N., Brown, D., Carrer, M., Cooper, R., C̣ufar,  
44 K., Dittmar, C., Esper, J., Griggs, C., Gunnarson, B., Günther, B., Gutierrez, E., Haneca, K., Helama, S., Herzig, F.,  
45 Heussner, K.-U., Hofmann, J., Janda, P., Kontic, R., Köse, N., Kyncl, T., Levanić, T., Linderholm, H., Manning, S.,

- 1 Melvin, T. M., Miles, D., Neuwirth, B., Nicolussi, K., Nola, P., Panayotov, M., Popa, I., Rothe, A., Seftigen, K., Seim,  
2 A., Svarva, H., Svoboda, M., Thun, T., Timonen, M., Touchan, R., Trotsiuk, V., Trouet, V., Walder, F., Ważny, T.,  
3 Wilson, R., and Zang, C.: Old World megadroughts and pluvials during the Common Era, *Sci. Adv.*, 1, e150061,  
4 <https://doi.org/10.1126/sciadv.1500561>, 2015.
- 5 Cook, E.R., Anchukaitis, K.J., Buckley, B.M., D'Arrigo, R.D., Jacoby, G.C., and Wright W.E.: Asian monsoon failure  
6 and megadrought during the last millennium. *Science* 328, 486–489, 2010.
- 7 Cook, E.R., Woodhouse, C.A., Eakin, C.M., Meko, D.M., and Stahle D.W.: Long-term aridity changes in the western  
8 United States, *Science* 306, 1015–1018, 2004.
- 9 Čufar, K., De Luis, M., Eckstein, D. and Kajfež-Bogataj, L.: Reconstructing dry and wet summers in SE Slovenia  
10 from oak tree-ring series, *Int. J. Biometeorol.*, 52(7), 607–615, doi:10.1007/s00484-008-0153-8, 2008.
- 11 Dai, A. and Trenberth K.E.: Global Variations in Droughts and Wet Spells: 1900-1995, *Geophys. Res. Letters*, 25  
12 (17), 3367-3370, 1998.
- 13 Dai, A., Trenberth, K.E., and Qian T.: A Global Dataset of Palmer Drought Severity Index for 1870–2002:  
14 Relationship with Soil Moisture and Effects of Surface Warming, *J. of Hydrometeorology*, 5, 1117-1130, 2004.
- 15 Dai, A.: Drought under global warming: a review, *Wiley Interdisciplinary Reviews: Clim. Change*, 2, 45–65, 2011a.
- 16 Dai, A.: Characteristics and trends in various forms of the Palmer Drought Severity Index during 1900–2008, *J.*  
17 *Geophys. Res.*, 116, D12115, doi:10.1029/2010JD015541, 2011b.
- 18 Dai, A.: Increasing drought under global warming in observations and models, *Nature Climate Change*, 3, 52-58,  
19 2013.
- 20 Dobrovolný, P., Rybníček, M., Kolář, T., Brázdil, R., Trnka, M., and Büntgen, U.: A tree-ring perspective on temporal  
21 changes in the frequency and intensity of hydroclimatic extremes in the territory of the Czech Republic since 761 AD,  
22 *Clim. Past*, 11, 1453-1466, <https://doi.org/10.5194/cp-11-1453-2015>, 2015.
- 23 Domínguez-Castro, F., Garcia-Herrera, R., Ribera, P., and Barriendos, M.: A shift in the spatial patterns of Iberian  
24 droughts during the 17th century, *Clim. Past*, 6, 553–563, 2010.
- 25 Domínguez-Castro, F., Santisteban, J.I., Barriendos, M., and Mediavilla, R.: Reconstruction of drought episodes for  
26 central Spain from rogation ceremonies recorded at the Toledo Cathedral from 1506 to 1900: a methodological  
27 approach, *Global Planet Change*, 63, 230–242, 2008.
- 28 Doroszewski, A., Jadczyński, J., Kozyra, J., Pudełko, R., Stuczyński, T., Mizak, K., Łopatka, A., Koza, P., Górski,  
29 T., and Wróblewska E.: Podstawy systemu monitoringu suszy rolniczej (The basics of agricultural drought monitoring  
30 system), *Woda-Środowisko-Obszary Wiejskie*, 12 (2), 77-91, 2012.
- 31 Doroszewski, A., Kozyra, J., Pudełko, R., Stuczyński, T., Jadczyński, J., Koza, P., and Łopatka, A.: Monitoring suszy  
32 rolniczej w Polsce (Monitoring of agricultural drought in Poland), *Wiadomości Melioracyjne i Łąkarskie*, 1, 35-38,  
33 2008.
- 34 Dove, H.W.: Bericht über die in den Jahren 1848 und 1849 auf den Stationen des Meteorologischen Instituts im  
35 Preussen Staate angestellten Beobachtungen. Berlin, 1851.
- 36 Ephemerides Societatis Meteorologicae Palatinae. 1783–1795. vol. IIXIII, Mannheim.
- 37 Farat, R., Kepinska – Kasprzak, M., Kowalczak, P., and Mager, P.: Droughts in Poland, 1951-90, *Drought Network*  
38 *News* (1994-2001), 42, 1998. <http://digitalcommons.unl.edu/droughtnetnews/42>.
- 39 Filipiak, J., Przybylak, R. and Oliński, P.: The longest one-man weather chronicle (1721–1786) by Gottfried Reyger  
40 for Gdańsk, Poland as a source for improved understanding of past climate variability. *Int. J. Climatol.*, doi:  
41 10.1002/joc.5845, 828-842, 2019.



- 1 Filipiak, J.: Długookresowa zmienność opadów atmosferycznych w Gdańsku w okresie 1880-2010 (Long-term  
2 variability of atmospheric precipitation in Gdańsk in the period 1880-2010). *Prace i Studia Geograficzne UW*, 47,  
3 119-128, 2011.
- 4 Filipiak, J.: Obserwacje i pomiary opadów atmosferycznych w Gdańsku w XVIII wieku. In: Piotrowicz K., Twardosz  
5 R. (eds) *Wahania klimatu w różnych skalach przestrzennych i czasowych*, UJ, Kraków, Poland, 365–373, 2007.
- 6 Fragoso, M., Carraça, M. G., Alcoforado, M.J.: Droughts in Portugal in the 18<sup>th</sup> century: A study based on newly  
7 found documentary data, *Int. J. Climatol.* 38, 5522-5541, 2018.
- 8 Fritts, H.: *Tree rings and climate.*, Academic Press, London., 1976.
- 9 Girguś, R., Strupczewski, W. and Rojecki, A.: Wyjątki ze źródeł historycznych o nadzwyczajnych zjawiskach  
10 hydrologiczno-meteorologicznych na ziemiach polskich w wiekach od X do XVI (Exceptions from historical sources  
11 about extraordinary hydrological and meteorological phenomena in Polish lands from the 10th to the 16th centuries),  
12 Wydawnictwa Komunikacji i Łączności, Warszawa, Poland, 1965 (in Polish).
- 13 Greve, P., Orlowsky, B., Mueller, B, Sheffel, J., Reichstein, M. and Seneviratne, S.I.: Global assessment of trends in  
14 wetting and drying over land, *Nature Geoscience*, 7: 716–721, DOI: 10.1038/NGEO2247, 2014.
- 15 Hanel, M., Rakovec, O, Markonis, Y., Máca, P., Samaniego, L., Kyselý, J., Kumar R.: Revisiting the recent European  
16 droughts from a long-term perspective, *Scientific Report*, 8:9499 | DOI:10.1038/s41598-018-27464-4, 2018.
- 17 Hanow, M.C., 1773, *Wetterbeobachtungen in Danzig von aus Jahren 1739 bis 1773*. Volumes 1-3. Manuscript.
- 18 Helama, S. and Lindholm, M.: Droughts and rainfall in south-eastern Finland since AD 874 , inferred from Scots pine,  
19 *BOREAL Environ. Res.*, 8, 171–183, 2003.
- 20 Helama, S., Holopainen, J., Timonen, M., & Mielikäinen, K.: An 854-year tree-ring chronology of scots pine for  
21 south-west Finland. *Studia Quaternaria*, 31(1), 61-68, 2014.
- 22 Held, I.M., Delworth, T.L., Lu, J., Findell, K.L., and Knutson T.R.: Simulation of Sahel drought in the 20th and 21st  
23 centuries, *PNAS*, 102 (50), 17891–17896, 2005.
- 24 Hellmann, C.: *Repertorium der deutschen Meteorologie*, Leipzig, 1883.
- 25 Herweijer, C., Seager, R., Cook, E.R., and Emile-Geay J.: North American Droughts of the Last Millennium from a  
26 Gridded Network of Tree-Ring Data, *J. of Clim.*, 20, 1353-1375, 2007.
- 27 IMGW: Drought monitoring system “POSUCH@”, [http:// posucha.imgw.pl](http://posucha.imgw.pl), 2014.
- 28 Inglot, S.: Zjawiska klimatyczno-meteorologiczne na Śląsku od XVI do połowy XIX wieku, Z badań nad wpływem  
29 posuchy na rolnictwo na Dolnym Śląsku (Climatic and Meteorological Phenomena in Silesia from the 16th to the mid-  
30 19th century), ed. by B. Świętochowski, 9-52, Wrocławskie Towarzystwo Naukowe, Wrocław 1968.
- 31 IPCC, *Climate Change 2013: The Physical Science Basis*. IPCC Working Group I Contribution to Fifth Assessment  
32 Report of the Intergovernmental Panel on Climate Change, Cambridge University Press, Cambridge, United Kingdom  
33 and New York, NY, 2013.
- 34 IPCC, *Climate Change 2014: Impacts, Adaptation, and Vulnerability, Part A: Global and Sectoral Aspects*, in:  
35 Contribution of Working Group II to the Fifth Assessment Report of the Intergovernmental Panel on Climate Change,  
36 edited by: Field, C. B., Barros, V. R., Dokken, D. J., Mach, K. J., Mastrandrea, M. D., Bilir, T. E., Chatterjee, M., Ebi,  
37 K. L., Estrada, Y. O., Genova, R. C., Girma, B., Kissel, E. S., Levy, A. N., MacCracken, S., Mastrandrea, P. R., and  
38 White, L. L., Cambridge University Press, Cambridge, UK and New York, NY, USA, 1132 pp., 2014.
- 39 ITP: System “Monitoring and forecasting water deficit and surplus in agriculture”, <http://agrometeo.itp.edu.pl>, 2014.
- 40 Jevšenak, J. and Levanič, T.: dendroTools: R package for studying linear and nonlinear responses between tree-rings  
41 and daily environmental data, *Dendrochronologia*, 48, 32–39, doi:10.1016/J.DENDRO.2018.01.005, 2018.

- 1 Kaca, E., Stapel, Z. and Śniadowski Z.: Gospodarka wodna w rolnictwie w świetle suszy 1992 roku (Water  
2 management in agriculture in the light of drought in 1992), Materiały Informacyjne IMUZ, 22, Warsaw, Poland, 1993.
- 3 Kalbarczyk, R.: Temporal and spatial diversity of the occurrence of atmospheric drought in Poland (1966-2005) and  
4 its effect of yield of pickling cucumber (*Cucumis sativus* L.), Spanish J. of Agricult. Res., 8(4), 1147-1162, 2010.
- 5 Koprowski, M., Przybylak, R., Zielski, A. and Pospieszyńska, A.: Tree rings of Scots pine (*Pinus sylvestris* L.) as a  
6 source of information about past climate in northern Poland., Int. J. Biometeorol., 56(1), 1–10, doi:10.1007/s00484-  
7 010-0390-5, 2012.
- 8 Kożuchowski, K.: Zmienność opadów atmosferycznych w Polsce w stuleciu 1881-1980 (Variability of atmospheric  
9 precipitation in Poland in the 1881-1980 century). Acta Geograph. Lodz., 48, 158 pp., 1985.
- 10 Kożuchowski, K. and Miętus, M.: Historia zmian klimatu w Szczecinie (History of climate change in Szczecin) [in:]  
11 Kożuchowski, K. (ed.). Współczesne zmiany klimatyczne. Klimat Szczecina i współczesne zmiany klimatyczne w  
12 rejonie Morza Bałtyckiego, Uniwersytet Szczeciński, Rozprawy i Studia, 98, 45-60, 1996.
- 13 Kożuchowski, K. and Żmudzka, E.: 100 year series of the areally averaged temperatures and precipitation totals in  
14 Poland, [w:] L. J. Pyka i in. (red.), Men and Climate in the 20th century, Acta Univ. Wratislav., 2542, Stud. Geogr.,  
15 75: 116-222, 2003.
- 16 Larocque-Tobler, I., Filipiak, J., Tylmann, W., Bonk, A. and Grosjean, M.: Comparison between chironomid-inferred  
17 mean-August temperature from varved Lake Żabińskie (Poland) and instrumental data since 1896 AD. Quatern. Sc.  
18 Rev., 111, 35-50, 2015
- 19 Liang, W., Heinrich, I., Simard, S., Helle, G., Liñán, I. D. and Heinken, T.: Climate signals derived from cell anatomy  
20 of Scots pine in NE Germany., Tree Physiol., 33(8), 833–844, doi:10.1093/treephys/tpt059, 2013.
- 21 Limanówka, D., Rekonstrukcja warunków klimatycznych Krakowa w pierwszej połowie XVI wieku (Reconstruction  
22 of climatic conditions in Cracow in the first half of the 16th century). Materiały Badawcze IMGW, *Seria:*  
23 *Meteorologia* 33: 1–176, 2001.
- 24 Liszewska, M., Konca-Kędzierska, K., Jakubiak, B., and Śmiałecka, E.: Opracowanie scenariuszy zmian klimatu dla  
25 Polski i wybranych regionów (Development of climate change scenarios for Poland and selected regions), Report 2,  
26 KLIMADA project, ICM, Warsaw, 54 pp., 2012.
- 27 Lorenc, H.: Studia nad 220-letnią (1779-1998) serią temperatury powietrza w Warszawie oraz ocena jej wiekowych  
28 tendencji (Studies on 220-year-old (1779-1998) series of air temperature in Warsaw and assessment of its tendencies),  
29 Materiały Badawcze IMGW, seria: Meteorologia 31: 1-104 pp., 2000
- 30 Lorenc, H.: Długookresowe zmiany opadów atmosferycznych oraz maksymalnej i  
31 minimalnej temperatury powietrza w Warszawie (Long-term changes of monthly  
32 precipitation and maximum and minimum air temperature in Warsaw),  
33 Sprawozdanie z tematu badawczego DSK IMGW, 2007 (unpublished).
- 34 Łabędzki, L.: Susze rolnicze – zarys problematyki oraz metody monitorowania i klasyfikacji (Agricultural drought -  
35 an outline of the problems and methods of monitoring and classification), Woda-Środowisko-Obszary Wiejskie,  
36 Rozpr. Nauk. i Monografie, 17, 107 pp., 2006.
- 37 Łabędzki, L.: Estimation of local drought frequency in Central Poland using the standardized precipitation index SPI,  
38 Irrig. Drain., 56, 67–77, 2007.
- 39 Łabędzki, L.: Susze-potencjalne straty w plonach i sposoby przeciwdziałania, Odnawialne źródła energii i działania  
40 adaptacyjne do zmian klimatu w rolnictwie i na wsi - przykłady doświadczeń w UE (Drought-potential yield losses  
41 and counteracting measures, Renewable energy sources and adaptation measures to climate change in agriculture and  
42 the countryside - examples of experiences in the EU), ed. A. Grzybek, Scholar, Warszawa, Poland, 103-117 pp., 2009.
- 43 Łabędzki, L., Bąk, B.: Meteorological and agricultural drought indices used in drought monitoring in Poland: A  
44 review, Meteorology Hydrology Water Management, 2(2),3–14, 2014.

- 1 Łabędzki, L., Bąk, B., Kanecka-Geszke, E., Kasperska-Wołowicz, W., Smarzyńska, K.: Związek między suszą  
2 meteorologiczną i rolniczą w różnych regionach agroklimatycznych Polski (The relationship between meteorological  
3 and agricultural drought in various agroclimatic regions of Poland), Wydawnictwo IMUZ, 132 pp., 2008.
- 4 Łabędzki, L., Kanecka-Geszke, E.: Standardized evapotranspiration as an agricultural drought index. *Irrigation and*  
5 *Drainage*. Vol. 58, Issue 5, pp. 607-616, DOI: 10.1002/ird.421, 2009.
- 6 Magier, P., Kuźnicka, M., Kępińska-Kasprzak, M., and Farat, R.: Changes in the intensity and frequency of  
7 occurrence of droughts in Poland (1891-1995), *Geographa Polonica*, 73, 41-47, 2000.
- 8 Malewicz, H. M.: Zjawiska przyrodnicze w relacjach dziejopisarzy polskiego średniowiecza (Natural Events in  
9 Reports by the Historians of Medieval Poland), Zakład Narodowy im. Ossolińskich, Wrocław-Warszawa-Kraków-  
10 Gdańsk, 1980.
- 11 Maliszewski, K.: Obraz świata przyrody w kulturze staropolskiej. Egzemplifikacja zagadnienia na podstawie gazet  
12 pisanych (An image of the natural world in Old Polish culture. Exemplification of the issue based on written  
13 newspapers), [In:], *Historia-klimat-przyroda. Perspektywa antropocentryczna (Natura, Homines, Historia. Studia z*  
14 *historii środowiskowej*, vol. 1), ed. by P. Oliński, W. Piasek, p. 135-166, 2018.
- 15 McKee, T.B., Doesken, N.J., and Kleist J.: The relationship of drought frequency and duration to time scales, [In:],  
16 *Proceedings of the 8th Conference on Applied Climatology*, 17 (22), 179-183, 1993.
- 17 Miętus, M.: O ciągłości i jednorodności wieloletnich serii klimatologicznych na przykładzie rezultatów pomiarów w  
18 Koszalinie (On continuity and homogeneity of long-term climatological series on the example of measurement results  
19 in Koszalin) [in:] Wójcik, G. and Marciniak, K. (eds.) *Działalność naukowa Prof. Wł. Górczyńskiego i jej*  
20 *kontynuacja*, UMK Toruń, s.321- 336, 2002.
- 21 Miętus, M.: Zmienność temperatury i opadów w rejonie polskiego wybrzeża Morza Bałtyckiego i jej spodziewany  
22 przebieg do roku 2030 (Long-term variation of temperature and precipitation on the Polish coast and expected changes  
23 until 2030). *Materiały Badawcze IMGW, Seria: Meteorologia* 26: 1–72, 1996.
- 24 Miles, D., Neuwirth, B., Nicolussi, K., Nola, P., Panayotov, M., Popa, I., Rothe, A., Seftigen, K., Seim, A., Svarva,  
25 H., Svoboda, M., Thun, T., Timonen, M., Touchan, R., Trotsiuk, V., Trouet, V., Walder, F., Ważny, T., Wilson, R.,  
26 and Zang, C.: Old world megadroughts and pluvials during the common era, *Sci. Adv.*, 1, e1500561,  
27 doi:10.1126/sciadv.1500561, 2015.
- 28 Mishra, A. K. and Singh, V. P.: A review of drought concepts, *J. Hydrol.*, 391, 202–216, 2010.
- 29 Namaczyńska, S.: Kronika klęsk elementarnych w Polsce i w krajach sąsiednich w latach 1648-1696 (Chronicle of  
30 elementary events in Poland and in neighbouring countries in the years 1648-1696), Lwów, 1937.
- 31 NAS: Polish National Strategy for Adaptation to Climate Change (NAS 2020) with the perspective by 2030, Ministry  
32 of the Environment, Republic of Poland, Warsaw, [https://klimada.mos.gov.pl/wp-](https://klimada.mos.gov.pl/wp-content/uploads/2014/12/ENG_SPA2020_final.pdf)  
33 [content/uploads/2014/12/ENG\\_SPA2020\\_final.pdf](https://klimada.mos.gov.pl/wp-content/uploads/2014/12/ENG_SPA2020_final.pdf), 2013.
- 34 Neuwirth, B., Schweingruber, F. H. and Winiger, M.: Spatial patterns of central European pointer years from 1901 to  
35 1971, *Dendrochronologia*, 24(2–3), 79–89, doi:10.1016/j.dendro.2006.05.004, 2007.
- 36 Niedźwiedź, T., Glaser, R., Hansson, D., Helama, S., Klimentko, V., Łupikasza, E., Małarzewski, Ł., Nordli, Ø.,  
37 Przybylak, R., Riemann, D., Solomina, O.: The Historical Time Frame (Past 1000 Years), [In:] The BACC II Author  
38 Team, Second Assessment of Climate Change for the Baltic Sea Basin, *Regional Climate Studies*, Springer Open, 51-  
39 65, DOI 10.1007/978-3-319-16006-1\_3, 2015.
- 40 Nowosad, W. and Oliński, P.: The extreme year of 1540 in terms of climate variation from the perspective of historical  
41 sources derived from the Polish and Baltic territories. [In:] Kiss A. and Pribyl K. (eds.) *Dance of Death*. 2019.
- 42 Nowosad, W., Przybylak, R., Marciniak, K., Syta, K.: *Diariusz Jana Antoniego Chrapowickiego jako źródło do badań*  
43 *klimatu Rzeczypospolitej w drugiej połowie XVII wieku*, *Klio*, 9, 21-60, 2007.
- 44 Opała, M.: The 443-Year Tree-Ring Chronology for the Scots Pine from Upper Silesia (Poland) as A Dating Tool and  
45 Climate Proxy, *Geochronometria*, 42(1), 41–52, doi:10.1515/geochr-2015-0005, 2015.

- 1 Opała, M. and Mendecki, M. J.: An attempt to dendroclimatic reconstruction of winter temperature based on  
2 multispecies tree-ring widths and extreme years chronologies (example of Upper Silesia, Southern Poland), *Theor.*  
3 *Appl. Climatol.*, 115(1–2), 73–89, doi:10.1007/s00704-013-0865-5, 2014.
- 4 Osuch, M., Kindler, J., Romanowicz, R. J., Berbeka, K., and Banrowska, A.: KLIMADA Strategia adaptacji Polski  
5 do zmian klimatu w zakresie sektora “Zasoby i gospodarka wodna” (Strategy for Poland's adaptation to climate change  
6 in the sector of "Water resources and management"). KLIMADA project, IGF PAN, Warsaw, 245 pp., 2012.
- 7 Osuch, M., Romanowicz, R.J., Lawrence, D., and Wong, W.K.: Trends in projections of standardized precipitation  
8 indices in a future climate in Poland, *Hydrol. Earth Syst. Sci.*, 20, 1947–1969, doi:10.5194/hess-20-1947-2016, 2016.
- 9 Osuch, M., Romanowicz, R.J., Lawrence, D., and Wong, W.K.: Assessment of the influence of bias correction on  
10 meteorological drought projections for Poland, *Hydrol. Earth Syst. Sci. Discuss.*, 12, 10331–10377,  
11 doi:10.5194/hessd-12-10331-2015, 2015.
- 12 Pfister, C., Weingartner, R., and Luterbacher, J.: Hydrological winter droughts over the last 450 years in the Upper  
13 Rhine basin: a methodological approach, *Hydrol. Sci. J.*, 51, 966–985, doi:10.1623/hysj.51.5.966, 2006.
- 14 Pfister, C., Wetter, O., Brázdil, R., Dobrovolný, P., Glaser, R., Luterbacher, J., Seneviratne, S. I., Zorita, E., Alcoforado,  
15 M.-J., Barriendos, M., Bieber, U., Burmeister, K. H., Camenisch, C., Contino, A., Grünwald, U., Herget, J.,  
16 Himmelsbach, I., Labbé, T., Limanówka, D., Litzenburger, L., Kiss, A., Kotyza, O., Nordli, Ø., Pribyl, K., Retsö, D.,  
17 Riemann, D., Rohr, C., Siegfried, W., Spring, J.-L., Söderberg, J., Wagner, S., and Werner, J. P.: Tree rings and people  
18 – different view on the 1540 Megadrought. Reply to Büntgen et al. 2015, *Clim. Change*, 131, 191–198,  
19 <https://doi.org/10.1007/s10584-015-1429-8>, 2015.
- 20 Piervitali, E. and Colacino, M.: Evidence of drought in western Sicily during the period 1565–1915 from liturgical  
21 offices, *Clim Change*, 49, 225–238, 2001.
- 22 Pospieszńska, A. and Przybylak, R.: Ekstremalne warunki klimatyczne w Toruniu w okresie pomiarów  
23 instrumentalnych 1871–2010 (Extreme weather conditions in Toruń during the instrumental measurements period,  
24 1871–2010), [in:] Głowiński, T. and Kościk, E. (eds.) *Od powietrza, głodu, ognia i wojny... : klęski elementarne na*  
25 *przestrzeni wieków : Wrocławskie Spotkania z Historią Gospodarczą - Spotkanie VIII*, GAJT Wydawnictwo, 187-  
26 196, 2013.
- 27 Pritzkow, C., Wazny, T., Heußner, K. U., Słowiński, M., Bieber, A., Liñán, I. D., Helle, G. and Heinrich, I.: Minimum  
28 winter temperature reconstruction from average earlywood vessel area of European oak (*Quercus robur*) in N-Poland,  
29 *Palaeogeogr. Palaeoclimatol. Palaeoecol.*, 449, 520–530, doi:10.1016/j.palaeo.2016.02.046, 2016.
- 30 Pruchnicki, J.: *Metody opracowań klimatologicznych (Methods of climatological studies)*, Państwowe Wydawnictwo  
31 Naukowe, 1987.
- 32 Przybylak, R.: Changes in Poland's climate over the last millennium, *Czasopismo Geograficzne*, 82 (1-2): 23-48,  
33 2011.
- 34 Przybylak, R.: Poland's Climate in the Last Millennium, *Oxford Research Encyclopedia, Climate Science*, Oxford  
35 University Press USA, 36 pp., DOI: 10.1093/acrefore/9780190228620.013.2, 2016.
- 36 Przybylak, R., Majorowicz, J., Wójcik, G., Zielski, A., Chorążyczewski, W., Marciniak, K., Nowosad, W., Oliński,  
37 P. and Syta K.: Temperature changes in Poland from the 16th to the 20th centuries, *Int. Journal of Clim.*, 25, 773-791,  
38 <https://doi.org/10.1002/joc.1149>, 2005.
- 39 Przybylak, R. and Marciniak, K.: Climate Changes in the Central and North-eastern Parts of the Polish-Lithuanian  
40 Commonwealth from 1656 to 1685. [In:] *The Polish Climate in the European Context: An Historical Overview*,  
41 Przybylak, R., Majorowicz, J., Brázdil, R., Kejna, M. (eds), Springer, Berlin Heidelberg New York, 423-443, 2010.
- 42 Przybylak, R., Oliński, P., Chorążyczewski, W., Nowosad, W. and Syta K.: The Climate of Poland in Recent  
43 Centuries: A Synthesis of Current Knowledge: Documentary evidence. [In:] *The Polish Climate in the European*  
44 *Context: An Historical Overview*, Przybylak, R., Majorowicz, J., Brázdil, R., Kejna, M. (eds), Springer, Berlin  
45 Heidelberg New York, 167-190, 2010.
- 46 Przybylak, R., Pospieszńska, A., Wyszynski, P. and Nowakowski M.: Air temperature changes in Żagan (Poland) in  
47 the period from 1781 to 1792. *Int. J. Climatol.* 34: 2408–2426, 2014.

- 1 Przybylak, R., Wójcik, G., Marciniak, K., Chorążyczewski, W., Nowosad, W., Oliński, P. and Syta K.: Zmienność  
2 warunków termiczno-opadowych w Polsce w okresie 1501-1840 w świetle danych historycznych (Variability of  
3 thermal and precipitation conditions in Poland from 1501 to 1840 based on historical sources). *Przeegl. Geograficzny*  
4 76, 5–31, 2004.
- 5 Przybylak, R., Wójcik, G. and Majorowicz J.: Zmiany temperatury powietrza i opadów atmosferycznych w Polsce w  
6 okresie XVI-XX wiek (Changes of air temperature and atmospheric precipitation in Poland from 16th to 20th century),  
7 *Prace i Studia Geograficzne*, 29, Wyd. Uniw. Warszawskiego, 79-92, 2001.
- 8 Puchałka, R., Koprowski, M., Przybylak, J., Przybylak, R. and Dąbrowski, H.: Did the late spring frost in 2007 and  
9 2011 affect tree-ring width and earlywood vessel size in Pedunculate oak ( *Quercus robur* ) in northern Poland ?, *Int.*  
10 *J. Biometeorol.*, 60(8), 1143–1150, doi:10.1007/s00484-015-1107-6, 2016.
- 11 R Development Core Team: R: a language and environment for statistical computing, [online] Available from:  
12 <http://www.r-project.org>, 2007.
- 13 Radzka, E.: The assessment of atmospheric drought during vegetation season (according to standardized precipitation  
14 index SPI) in central-eastern Poland, *J. Ecol. Engineering*, 16 (1), 87–91, DOI: 10.12911/22998993/591, 2015.
- 15 Reichsamt für Wetterdienst: Klimakunde des Deutschen Reiches. Band II Tabellen mit Karten. Verlag von Dietrich  
16 Reimer, Andrews&Steiner, 560 pp., 1939.
- 17 Reinhold, W.: *Chronik der Stadt Soldin von der ältesten bis auf neueste Zeit*, Soldin, 1846.
- 18 Reyger, G.: *Die Beschaffenheit der Witterung in Danzig vom Jahre 1722–1769 beobachtet, nach ihren Veränderungen*  
19 *und Ursachen erwogen, und mit dem Wetter anderer Orten verglichen*. Gdańsk, Leipzig, Daniel Ludwig Wedel Press.  
20 520 pp., 1770.
- 21 Reyger, G.: *Die Beschaffenheit der Witterung in Danzig vom Jahre 1770–1786 beobachtet, nach ihren Veränderungen*  
22 *und Ursachen erwogen, und mit dem Wetter anderer Orten verglichen*. Gdańsk, Daniel Ludwig Wedel Press. 200 pp.  
23 (c.a.), 1788.
- 24 Rojecki, A.: Kilka uwag o najdawniejszych obserwacjach meteorologicznych w Toruniu na tle wyników jednocześnie  
25 prowadzonych spostrzeżeń w Warszawie. (A few remarks about the earliest meteorological observations in Toruń  
26 against the background of the results of simultaneous observations in Warsaw). *Przeegląd Geofizyczny* X, 141–151,  
27 1965.
- 28 Sadowski, M.: Variability of extreme climatic events in Central Europe since the 13th century, *Z. Meteorol.* 41, 350-  
29 356, 1991.
- 30 Seftigen, K., Linderholm, H.W., Drobyshev, I. and Niklasson, M.: Reconstructed drought variability in southeastern  
31 Sweden since the 1650s. *Int. J. Climatol.* 33(17): 2449–2458, 2013.
- 32 Seneviratne, S. I., Nicholls, N., Easterling, D., Goodess, C. M., Kanae, S., Kossin, J., Luo, Y., Marengo, J., McInnes,  
33 K., Rahimi, M., Reichstein, M., Sorteberg, A., Vera, C., and Zhang, X.: Changes in climate extremes and their impacts  
34 on the natural physical environment, in: *Managing the Risks of Extreme Events and Disasters to Advance Climate*  
35 *Change Adaptation, A Special Report of Working Groups I and II of the Intergovernmental Panel on Climate Change*  
36 (IPCC), edited by: Field, C. B., Barros, V., Stocker, T. F., Qin, D., Dokken, D. J., Ebi, K. L., Mastrandrea, M. D.,  
37 Mach, K. J., Plattner, G.-K., Allen, S. K., Tignor, M., and Midgley, P. M., Cambridge University Press, Cambridge,  
38 UK, and New York, NY, USA, 109–230, 2012.
- 39 Sheffield, J., Wood, E.F., and Roderick M.L. :Little change in global drought over the past 60 years, *Nature*, 491,  
40 435–438, 2012.
- 41 Słota, H., Bobiński, E., Dobrowolski, A., Fal, B., Gałka, S., Korol, R., Lorenc, H., Mierkiewicz, M., Rutkowski, Z.,  
42 Tomaszewska, T. and Żelaziński, J.: *Susza 1992. Zasięg, natężenie, przyczyny i skutki, wnioski na przyszłość*  
43 (Drought 1992. Range, intensity, causes and effects, conclusions for the future), Instytut Meteorologii i Gospodarki  
44 Wodnej, Warszawa, Poland, 1992.
- 45 Sohar, K., Helama, S., Läänelaid, A., Raisio, J. and Tuomenvirta, H.: Oak decline in a southern Finnish forest as  
46 affected by a drought sequence, *Geochronometria*, 41(1), 92–103, doi:10.2478/s13386-013-0137-2, 2013.

- 1 Štěpánek, P., Zahradníček, P., Skalák, P. (2009): Data quality control and homogenization of air temperature and  
2 precipitation series in the area of the Czech Republic in the period 1961-2007. *Advances in Science and Research*, 3,  
3 23-26, <http://www.adv-sci-res.net/3/23/2009/>
- 4 Szewczuk, J: *Kronika klęsk elementarnych w Galicji w latach 1772-1848 (Chronicle of elementary events in Galicia*  
5 *in the years 1772-1848)*, *Badania z Dziejów Społecznych i Gospodarczych*, 35, wyd. Kasa im. Mianowskiego w  
6 Warszawie, Lwów, 1939
- 7 Szychowska-Krąpiec, E.: Long-term chronologies of pine (*Pinus sylvestris* L.) and fir (*Abies alba* Mill.) from the  
8 Małopolska Region and their paleoclimatic interpretation. *Folia Quat* 79:5-24, , 5–124, 2010.
- 9 Tate, E.L. and Gustard, A.: Drought definition: a hydrological perspective. In: *Drought and Drought Mitigation in*  
10 *Europe*, Vogt JV, Somma F (eds). Kluwer: Dordrecht, 23–48, 2000.
- 11 Tokarczyk, T. and Szalińska, W.: The operational drought hazard assessment scheme – performance and preliminary  
12 results, *Arch. Environ. Prot.*, 39, 61–77, 2013.
- 13 Tokarczyk, T., and Szalińska, W.: Combined analysis of precipitation and water deficit for drought hazard assessment,  
14 *Hydrolog. Sci. J.*, 59, 1675–1689, 2014.
- 15 Twardosz, R.: *Dobowy przebieg opadów atmosferycznych w ujęciu synoptycznym i probabilistycznym na*  
16 *przykładzie Krakowa (1886-2002) (The daily course of precipitation in synoptic and probabilistic terms on the*  
17 *example of Krakow (1886-2002))*. UJ IGiP, 2005.
- 18 Twardosz, R.: *Opady atmosferyczne (Atmospheric precipitation) [in:] Matuszko D. (ed.) Klimat Krakowa w XX*  
19 *wieku*. UJ, Kraków, 127-152, 2007.
- 20 Vitas, A.: Drought of 1992 in Lithuania and Consequences to Norway Spruce, *Balt. For.*, 7(2), 25–30, 2001.
- 21 Walawender, A.: *Kronika klęsk elementarnych w Polsce i w krajach sąsiednich w latach 1450-1586 (Chronicle of*  
22 *elementary events in Poland and in neighboring countries in the years 1450-1586)*, Lwów-Warszawa, Poland, 1935.
- 23 Ważny, T.: *Aufbau und Anwendung der Dendrochronologie für Eichenholz in Polen, Dissertation, zur Erlangung des*  
24 *Doktorgrades des Fachbereichs Biologie der Universität Hamburg.*, 1990.
- 25 Wernicke, J.E.: *Geschichte Thorns aus Urkunden, Dokumenten und Handschriften*, 2, Thorn, 1842.
- 26 Wetter, O., Pfister, C., Werner J.P. Zorita, E., Wagner S., Seneviratne, S.I., Herget J. Grünewald U., Luterbacher J.,  
27 Alcoforado, M.-J., Barriendos M., Bieber U., Brázdil R., Burmeister K.H., Camenisch Ch., Contino A., Dobrovolný  
28 P., Glaser R., Himmelsbach I., Kiss A., Kotyza O., Labbé Th., Limanówka D., Litzenburger L., Nordl Ø., Pribyl K.,  
29 Retsö D., Riemann D., Rohr Ch., Siegfried W., Söderberg J., Spring J.-L., The year-long unprecedented European  
30 heat and drought of 1540 - a worst case, *Clim. Chang.*, 125, 349-363, <https://doi.org/10.1007/s10584-014-1184-2>,  
31 2014.
- 32 Wilhite, D.A. and Glantz, M.H.: Understanding the drought phenomenon: the role of definitions. *Water International*,  
33 10, 111–120, 1985.
- 34 White, S., Pfister, Ch. and Mauelshagen F. (eds.): *The Palgrave Handbook of Climate History*, London, Palgrave  
35 Macmillan, 2018.
- 36 Woodhouse, C.A., Mekob, D.M., MacDonald, G.M., Stahled D.W., and Cooke E.R.: A 1,200-year perspective of 21st  
37 century drought in southwestern North America, *PNAS*, 107( 50), 21283–21288, 2010.
- 38 Wójcik, G., Majorowicz, J., Marciniak, K., Przybylak, R., Šafanda, J. and Zielski A., The last millennium climate  
39 change in Northern Poland derived from well temperature profiles, tree-rings and instrumental data, *Prace Geogr.*,  
40 107, 137-148, 2000.
- 41 Wypych, A., Palarz, A., Kubacka, D.: Spatial differentiation and drought intensity in the Upper Silesia Region, Poland,  
42 (in:) G. Pandi, F. Moldovan (eds.), *Air and water components of the environment*, Cluj University Press, Romania,  
43 64-71, 2015

- 1 Zang, C. and Biondi, F.: Treeclim: an R package for the numerical calibration of proxy-climate relationships,  
2 Ecography (Cop.), 38(4), 431–436, doi:10.1111/ecog.01335, 2015.
- 3 Zielony, R. and Kliczkowska, A.: Regionalizacja przyrodniczo-leśna Polski 2010 (Regionalization of natural forests  
4 in Poland 2010). Centrum Informacyjne Lasów Państwowych., 2010.
- 5 Zielski, A., Krąpiec, M. and Koprowski, M.: Dendrochronological Data, [in:] Przybylak R., Majorowicz J., Brázdil  
6 R., Kejna M., (eds.). The Polish Climate in the European Context. An Historical Overview, doi:10.1007/978-90-481-  
7 3167-9, 2010.
- 8 **Main used archival sources**
- 9 Annales Conradi Molleri, meist Thorn angehend, Archiwum Państwowe w Toruniu, Akta miasta Torunia, Kat. II,  
10 XIII-12
- 11 Brauer Dawid, Geschichte der Stadt Thorn, zum Teil auch der Lande Preußen, vol. 1-3, Archiwum Państwowe w  
12 Toruniu, Akta miasta Torunia, Kat. II, XIII-54, XIII-54a, XIII-54b.
- 13 Diaryusz Życia JWJmci Pana Jana Antoniego Chrapowickiego Wojewody Witebskiego [...] przekopiowany w roku  
14 1786, T. 3 [1670-1673], Muzeum Narodowe w Krakowie, rps. MNKr. 169
- 15 Diaryusz Życia JWJmci Pana Jana Antoniego Chrapowickiego Wojewody Witebskiego [...] przekopiowany w roku  
16 1786, T. 4 [1674-1676], Muzeum Narodowe w Krakowie, rps. MNKr. 169
- 17 Diaryusz Życia JWJmci Pana Jana Antoniego Chrapowickiego Wojewody Witebskiego [...] przekopiowany w roku  
18 1786, T. 5 [1677-1679], Muzeum Narodowe w Krakowie, rps. MNKr. 169
- 19 Diaryusz Życia JWJmci Pana Jana Antoniego Chrapowickiego Wojewody Witebskiego [...] przekopiowany w roku  
20 1786, T. 6 [1680-1682], Muzeum Narodowe w Krakowie, rps. MNKr. 169
- 21 Diaryusz Życia JWJmci Pana Jana Antoniego Chrapowickiego Wojewody Witebskiego [...] przekopiowany w roku  
22 1786, T. 7 [1683-], Muzeum Narodowe w Krakowie, rps. MNKr. 169
- 23 Korespondencja Michała Dorengowskiego, Archiwum Główne Akt Dawnych, Archiwum Radziwiłłowskie, Dz. V,  
24 3207/II
- 25 Richtsteig Johann, Chronikalische Aufzeichnung Thorner und Thorn angehende Begebenheiten, 2. vol., Archiwum  
26 Państwowe w Toruniu, Akta miasta Torunia, Kat. II, XIII-80, XIII-80a
- 27 Żegota Pauli, Notaty z Kalendarzy dawnych krakowskich w. XV, XVI i XVII, Biblioteka Jagiellońska w Krakowie,  
28 Rękopis nr 5358
- 29 Old prints:
- 30 Curicke Reinhold, Der Stadt Dantzig historische Beschreibung, Amsterdam und Dantzig 1688
- 31 Gomolcke Daniel, Historische Beschreibung derer grossen Theuerungen, Hunger und Kummerjahre, welche nicht  
32 allein die k.u.k. Stadt Breslau, sondern auch dan gantze Land Schlesien bis auf das 1737 Jahr betroffen, Breslau 1737.
- 33 Kochowski Wespazjan, Annalium Poloniae ab obitu Vladislai IV. Climacter I-III, Cracoviae 1683-1698
- 34 Kronika Marcina Bielskiego (Zbiór dziejopisów polskich, 1), Warszawa 1764
- 35 Miechowita Maciej, Chronica Polonorum, Cracoviae 1521
- 36 Nicolai Henelius ab Hennenfeld Annales Silesiae, in: Silesiacarum rerum scriptores, ed. by F.W.von Sommersberg,  
37 Leipzig 1730
- 38 Theatrum Europaeum... das ist ausführliche Beschreibung der denckwürdigsten Geschichten, so sich hin und wieder  
39 durch Europa, wie auch in denen übrigen Welt-Theilen, von Jahr 1618 an ..., Franckfurt am Mayn 1663-1707
- 40 Zerneke J. H., Historiae Thoruniensis naufragae tabulae, Thorn 1711

- 1 The old press:
- 2 Kuryer Polski, Anno 1730 (Nr 15), 1739 (Nr 129, 133),
- 3 Kuryer Warszawski, 1763 (nr 75)
- 4 Thornische wöchentliche Nachrichten und Anzeigen nebst einem Anhang von gelehrten Sachen, Erstes Jahr 1760
- 5 Printed sources:
- 6 Annales Glogovienses bis z. J. 1493, ed. by Hermann Markgraf, in: *Scriptores rerum Silesiacarum*, vol. 10, Breslau
- 7 1877, p. 1-66.
- 8 Archivum vetus et novum Ecclesiae Archipresbyterialis Heilsbergensis, in: "Scriptores Rerum Warmiensium oder
- 9 Quellenschriften zur Geschichte Ermlands", ed. by Woelky Carl P., vol. 2, Braunsberg 1880, p. 587-758
- 10 Biblioteka starożytna pisarzy polskich, ed. K. Wł.. Wójcicki, Vol. 6, Warszawa 1844
- 11 Catalogus abbatum Saganensium, in: *Scriptores rerum Silesiacarum*, vol. 1, ed. by Gustav Adolf Stenzel, Breslau
- 12 1835, p. 173-528
- 13 Chrapowicki Jan Antoni, *Diariusz*, Vol 1-2: ed. by T. Wasilewski, Warszawa 1988
- 14 Chronik Michael Steinbergs, ed. by T. Schöborn, in: *Scriptores rerum Silesiacarum*, vol. 11 (Schweidnitzer Chronisten
- 15 des XVI. Jahrhunderts), ed. by Schimmelpfennig, Breslau 1878, p. 117-176
- 16 Die Thammendorf'sche Familienchronik, ed. by A. Schimmelpfennig, in: *Scriptores rerum Silesiacarum*, vol. 11
- 17 (Schweidnitzer Chronisten des XVI. Jahrhunderts), ed. by Schimmelpfennig, Schöborn, Breslau 1878, p. 1-58.
- 18 Długosza Jana Roczniki czyli Kroniki sławnego Królestwa Polskiego, 2. vol.: 12, 1445-1461 and 1462-1480, ed. by
- 19 Krzysztof Baczkowski et al., Warszawa 2009
- 20 Dupont Philippe, *Pamiętniki historii życia i czynów Jana III Sobieskiego*, ed. by Dariusz Milewski, transl. by Beata
- 21 Spieralska, Warszawa 2011
- 22 Kronika walichnowska (1703-1725), wyd. ks. A. Mańkowski, *Zapiski TNT*, t. 8, R. 1930
- 23 Kuczyński Wiktor, *Pamiętnik 1668-1737*, ed. by Józef Maroszek et al., Białystok 1999
- 24 Latopisiec albo kroniczka domowa Joachima Jerlicza, ed. K. W. Wójcicki, Vol. 2, Warszawa 1853
- 25 Marcin Murinius, *Kronika albo krótkie z kronik rozmaitych zebranie spraw potocznych ziemie z dawna słowney*
- 26 *pruskiey*, ed. by K. W. Wójcik, (Biblioteka starożytnych pisarzy polskich, IV), Warszawa 1843
- 27 Nicolaus Pol, *Jahrbücher der Stadt Breslau*, ed. by Johann Gustav Gottlieb Büsching, Johann Gottlieb Kunisch, vol.
- 28 1-5, Breslau 1813-1824
- 29 Niezabitowski Stanisław, *Dzienniki 1695-1700*, oprac. i wstęp A. Sajkowski, Poznań 1998
- 30 Ossoliński Zbigniew, *Pamiętnik*, ed. by Józef Długosz, Warszawa 1983
- 31 *Pamiętniki Łosia obejmujące wydarzenia 1646-1667*, ed. by Pauli Żegota, Kraków 1858
- 32 Pasek Jan Chryzostom, *Pamiętniki*, ed. by Roman Pollak, Warszawa 1963
- 33 Peter Eschenloer, *Geschichte der Stadt Breslau*, Vol. 1-2, ed. by Gunhild Roth, Münster-NewYork 2003
- 34 Peter Eschenloer, *Historia Wratislaviensis et que post mortem regis Ladislai sub electo Georgio de Podiebrat*
- 35 *Bohemorum rege illi acciderant prospera et adversa*, ed. by Hermann Markgraf, in: *Scriptores rerum Silesiacarum*,
- 36 vol. 7, Breslau 1872,



- 1 Preussische Chronik des Johannes Freiberg: aus den auf der Königsberger Stadtbibliothek befindlichen Handschriften  
2 ed. by Friedrich Adolf Meckelburg, Königsberg 1848
- 3 Radziwiłł Albrycht Stanisław, Pamiętnik o dziejach w Polsce, tom 1-3 1632-1656, oprac. A. Przyboś, R. Żelewski,  
4 Warszawa 1980
- 5 Rocznik Jana z Targowiska 1386-1491, ed. by Emil Kalitowski, in: Monumenta Poloniae Historica, vol. 3, Lwów  
6 1878, p. 232-240
- 7 Rocznik wrocławski dawny 1238-1308 i rocznik magistratu wrocławskiego 1149-1491, ed. by August Bielowski, in:  
8 Monumenta Poloniae Historica, vol. 3, Lwów 1878, p. 680-688
- 9 Rzączyński Gabriel, Historia Naturalis Curiosa Regni Poloniae, Magni Ducatus Lituaniae, annexarumque  
10 Provinciarum in tractatus XX divisa, Sandomiriae 1721
- 11 Sigismundi Rosiczii Chronica et numerus episcoporum Wratislaviensium, in: Scriptorum rerum Silesiacarum, ed. by  
12 F. Wächter, Breslau 1883, vol. 12, p. 29-86
- 13 Skoraczewski F., Materyały do historyi Miłosławia, Poznań 1910
- 14 Spominki kazimierskie 1422-1473, ed. by August Bielowski, in: Monumenta Poloniae Historica, vol. 3, Lwów 1878,  
15 p. 242-243.
- 16 Świętosława Orzelskiego Bezkrólewia ksiąg ósmioro 1572-1576, ed. by Edward Kuntze, in: Scriptorum rerum  
17 Polonicarum, vol. 22, Kraków 1917
- 18 Wernicke Julian Emil, Geschichte Thorns aus Urkunden, Dokumenten und Handschriften, 2. vol., Thorn 1839-1842
